# Supplementary material for: Assessing the relevance and implementation of patient-centredness from the patients’ perspective in Germany: results of a Delphi study
Source: PubMed Central journal article supplement — BMJ Open. 2019 Dec 23;9(12):e031741. doi: 10.1136/bmjopen-2019-031741 (PMC7008421; doi:10.1136/bmjopen-2019-031741), 2019-12-23
Supplement: bmjopen-2019-031741.draft_revisions.pdf [file bmjopen-2019-031741.draft_revisions.pdf]

# BMJ Open

BMJ Open is committed to open peer review. As part of this commitment we make the peer review history of every article we publish publicly available.

When an article is published we post the peer reviewers' comments and the authors' responses online. We also post the versions of the paper that were used during peer review. These are the versions that the peer review comments apply to.

The versions of the paper that follow are the versions that were submitted during the peer review process. They are not the versions of record or the final published versions. They should not be cited or distributed as the published version of this manuscript.

BMJ Open is an open access journal and the full, final, typeset and author-corrected version of record of the manuscript is available on our site with no access controls, subscription charges or pay-per-view fees (<http://bmjopen.bmj.com>).

If you have any questions on BMJ Open's open peer review process please email [editorial.bmjopen@bmj.com](mailto:editorial.bmjopen@bmj.com)

# BMJ Open

## Assessing the relevance and implementation of patient-centeredness from the patients' perspective in Germany: Results of a Delphi study

|                               |                                                                                                                                                                                                                                                                                                                                                                                                                                           |
|-------------------------------|-------------------------------------------------------------------------------------------------------------------------------------------------------------------------------------------------------------------------------------------------------------------------------------------------------------------------------------------------------------------------------------------------------------------------------------------|
| Journal:                      | <i>BMJ Open</i>                                                                                                                                                                                                                                                                                                                                                                                                                           |
| Manuscript ID                 | bmjopen-2019-031741                                                                                                                                                                                                                                                                                                                                                                                                                       |
| Article Type:                 | Research                                                                                                                                                                                                                                                                                                                                                                                                                                  |
| Date Submitted by the Author: | 21-May-2019                                                                                                                                                                                                                                                                                                                                                                                                                               |
| Complete List of Authors:     | Zeh, Stefan; Universitätsklinikum Hamburg-Eppendorf, Department of Psychosocial Medicine<br>Christalle, Eva; Universitätsklinikum Hamburg Eppendorf Zentrum für Psychosoziale Medizin, Department of Medical Psychology;<br>Hahlweg, Pola; Universitätsklinikum Hamburg-Eppendorf, Department of Medical Psychology<br>Härter, Martin; Universitätsklinikum Hamburg-Eppendorf<br>Scholl, Isabelle; Universitätsklinikum Hamburg-Eppendorf |
| Keywords:                     | patient-centeredness, chronic diseases, health care delivery, Delphi study, patient perspective                                                                                                                                                                                                                                                                                                                                           |
|                               |                                                                                                                                                                                                                                                                                                                                                                                                                                           |

SCHOLARONE™  
Manuscripts

1  
2  
3 **Assessing the relevance and implementation of patient-centeredness from the patients'**  
4 **perspective in Germany: Results of a Delphi study**  
5  
6  
7

8 Stefan Zeh<sup>1</sup>, Eva Christalle<sup>1</sup>, Pola Hahlweg<sup>1</sup>, Martin Härter<sup>1</sup>, Isabelle Scholl<sup>1</sup>  
9

10  
11 <sup>1</sup>Department of Medical Psychology, University Medical Center Hamburg-Eppendorf,  
12 Martinistraße 52, D-20246 Hamburg, Germany  
13  
14

15  
16 Email addresses:  
17

18 Stefan Zeh, M.Sc.: [s.zeh@uke.de](mailto:s.zeh@uke.de)  
19  
20 Eva Christalle, M.Sc.: [e.christalle@uke.de](mailto:e.christalle@uke.de)  
21  
22 Pola Hahlweg, Dipl.-Psych.: [p.hahlweg@uke.de](mailto:p.hahlweg@uke.de)  
23  
24 Prof. Dr. Dr. Martin Härter, Dipl.-Psych.: [m.haerter@uke.de](mailto:m.haerter@uke.de)  
25  
26 Dr. Isabelle Scholl, Dipl.-Psych.: [i.scholl@uke.de](mailto:i.scholl@uke.de)  
27  
28  
29

30 Corresponding author:  
31

32 Stefan Zeh, M.Sc.  
33 University Medical Center Hamburg-Eppendorf  
34 Department of Medical Psychology  
35 Martinistr. 52  
36  
37 20246 Hamburg, Germany  
38  
39 Email: [s.zeh@uke.de](mailto:s.zeh@uke.de)  
40  
41 Phone: +49-(0)40-7410-52001  
42  
43  
44  
45  
46  
47  
48  
49  
50  
51  
52  
53  
54  
55  
56  
57  
58  
59  
60

Word count for the abstract: 247 (max. 300)

Word count for the manuscript: 2457 (max. 4000)

Count for figures/tables: 4 (max. 5)

Count for references: 21

## 1 **ABSTRACT**

### 2 **Objective**

3 Patient-centeredness (PC) has particularly grown in importance in health services research as well as  
4 in politics and there has been much research on its conceptualization. However, conceptual work  
5 neglected the patients' perspective. Thus, it remains unclear which dimensions of PC matter most to  
6 patients. This study aims to assess relevance and current degree of implementation of PC from the  
7 perspective of chronically ill patients in Germany.

### 8 **Methods**

9 We conducted a Delphi study. Patients were recruited throughout Germany using community-based  
10 strategies (e.g. newspapers and support groups). In round one, patients rated relevance and  
11 implementation of 15 dimensions of PC anonymously. In round two, patients received results of  
12 round one and were asked to re-rate their own results. Participants had to have at least one of the  
13 following chronic diseases: cancer, cardiovascular disease, mental disorder, or musculoskeletal  
14 disorder. Furthermore, patients had to be at least 18 years old and had to give informed consent  
15 prior to participation.

### 16 **Results**

17 226 patients participated in round one, 214 patients in round two. In both rounds, all 15 dimensions  
18 were rated highly relevant, but currently insufficiently implemented. Most relevant dimensions  
19 included "patient safety", "access to care" and "patient information". There were no major  
20 differences between subgroups (e.g. comparing single disease and multi-morbidity).

### 21 **Conclusion**

22 This is one of the first studies assessing patient-centeredness from patients' perspective in Germany.  
23 Our results can be used to foster patient-centered health care delivery and to develop patient-  
24 reported experience measures to assess patient-centeredness of health care in Germany.

25

26 **Keywords:** patient-centeredness; chronic diseases; health care delivery; Delphi study; patient perspective

27

### 28 **Strengths and limitations of this study:**

- 29 - No rating of dimensions of patient-centeredness (PC) from the patients' perspective available yet
- 30 - Extensive inclusion of patients' perspectives within the Delphi study
- 31 - No restriction to a specific regional area through nation-wide community-based strategies
- 32 - Possibility for participants to give written feedback in order to enhance quality of given answers
- 33 - Limitation to only four chronic disease groups

34

35

36

37

38

39

40

41

## 35 INTRODUCTION

36 Over the last years, the concept of patient-centeredness (PC) has been widely discussed. Its  
37 relevance in politics, research and health care practice has been growing constantly [1–3]. Many  
38 studies showed a positive association of PC with relevant outcomes like patient satisfaction, well-  
39 being and adherence [4], which are especially relevant in chronic disease management.  
40 Nevertheless, there has been a lack of conceptual clarity regarding the use of the term of PC [5–10].  
41 Scholl and colleagues [9] closed this gap by developing an integrative generic model derived from  
42 literature extracting 15 dimensions of PC (see figure 1). This model was validated by assessing the  
43 views of different health care stakeholders on its relevance and clarity [11]. Although some  
44 representatives of patient organizations participated in this assessment, the perspective of the  
45 recipients of patient-centered care, the patients themselves, was underrepresented. In summary,  
46 without the patients' perspective, the conceptualization of PC is still missing its most crucial aspect:  
47 the assessment and evaluation of PC in health care from the view of patients [12–14].

48  
49 [Insert Figure 1 here]

50 **Figure 1 Integrative model of patient-centeredness (Scholl et al., 2014)**

51  
52 There are only few international studies investigating the patients' assessment of PC [15,16], without  
53 any published studies from Germany. Thus, we don't know what patients consider important about  
54 PC, nor how patients view the current degree of implementation of PC in the German health care  
55 system. Yet, this is crucial to foster PC as it allows prioritizing aspects especially relevant or not yet  
56 implemented.

57 Therefore, this study aims to close this gap by assessing relevance and current degree of  
58 implementation of different dimensions of PC from the patients' perspective in Germany.

## 60 METHODS

### 61 Study design

62 We used a Delphi study, comparable to the expert validation study mentioned before [11]. A Delphi  
63 study consists of several rounds. In each round after the first, participants get their own ratings as  
64 well as the median ratings of all participants in the previous round. This procedure generates the  
65 possibility for participants to discuss their opinion from different regional locations without the  
66 threat of some participants dominating the discussion [17]. It aims to reach high group consensus  
67 through a structured and anonymous group discussion [18]. Like Zill and colleagues [11], we decided  
68 to do two rounds.

1  
2  
3 70 **Preparation of the Delphi study – adaptation of the model of patient-centeredness using**  
4  
5 71 **cognitive interviews**

6 72 We based our Delphi study on the integrative model of PC [9,11]. In a first step, the scientific model  
7  
8 73 was adapted into a version comprehensible to patients (first version). Adaptation was done by group  
9  
10 74 discussions in our research team (SZ, EC, PH, IS) in nine iterations. To make sentences easy to  
11  
12 75 understand, we used dictionaries and recommendations on adaptation of wording and grammar  
13  
14 76 [19]. We then tested comprehensibility of the new version through cognitive interviews with  
15  
16 77 patients. We recruited ten patients through several community-based strategies (see below) in order  
17  
18 78 to get a heterogeneous sample regarding demographic variables (e.g. age, first language, educational  
19  
20 79 level). Participants had to have at least one of the following chronic diseases: cancer, cardiovascular  
21  
22 80 disease, mental disorder, or musculoskeletal disorder. In cognitive interviews, we handed out the  
23  
24 81 first adapted version described above. Participants were asked to read each dimension step by step  
25  
26 82 and explain in their own words how they understood the description. All interviews were audio-  
27  
28 83 recorded, transcribed, and analyzed independently by two researchers (SZ, EC). According to the  
29  
30 84 results, the model was revised (second version) in subsequent group discussions (SZ, EC, IS, PH).

31

32 85  
33 86 **Delphi study**

34 87 Participants received the adapted integrative model of PC (second version) and were asked to rate  
35  
36 88 relevance and current implementation from their perspective. For both aspects, a nine-point Likert  
37  
38 89 scale (1 = *not relevant/not well implemented*; 9 = *very relevant/well implemented*) was given. In  
39  
40 90 addition, we asked an open-ended question about whether any important aspects were missing in  
41  
42 91 the model and whether they had any further comments (e.g. regarding comprehensibility of  
43  
44 92 descriptions). Based on answers to those open-ended questions, we adapted the model again (third  
45  
46 93 version). In the second round of the Delphi study, we asked participants to repeat their rating after  
47  
48 94 they obtained their individual rating from the first round as well as the rating of other participants  
49  
50 95 (median). For all dimensions with adapted descriptions, participants were also asked to rate whether  
51  
52 96 the description worsened or improved with the adaptation (from 1 = *much worse* to 9 = *much*  
53  
54 97 *better*).

55 98 For both rounds, participants could choose whether they wanted to participate online or via mail.

56 99 Both versions were identical in terms of response format (see Appendix A1 for the mail-based  
57  
58 100 version with adaptations (highlighted) made after round 1). For the online version, we used  
59  
60 101 LimeSurvey [20]. The study was conducted from June 2018 to August 2018. For each round,  
102  
103 102 participants had three weeks to reply and there were four weeks between the two rounds. After  
completion of both rounds, participants received a compensation of 25€. Conducting the Delphi

1  
2  
3 104 study as well as reporting of methods and results were based on the recommendations of Hasson  
4  
5 105 and colleagues [18].

### 6 106 **Study population and recruitment**

8 107 We aimed to include 200 patients in the study. We expected a drop-out rate of 15% between round  
9  
10 108 1 and 2. Thus, we aimed to include 240 in the first round. We recruited patients through different  
11 109 community-based strategies: a) Notices in local stores in Hamburg, b) dissemination through national  
12  
13 110 and regional patient organizations and networks, c) Facebook groups of different towns, and d) two  
14  
15 111 national newspapers (ZEIT and Bild). Participants were included if they gave their informed consent,  
16 112 were 18 years or older and if they reported at least one disease from one of the aforementioned  
17 113 chronic disease groups.  
18  
19  
20 114

### 21 115 **Patient and Public Involvement**

23 116 Patients were not involved in the development of the research questions. However, during the  
24  
25 117 development of the research proposal and prior to submission to the funding agency, we obtained  
26 118 collaboration agreements with several federal and regional patient organizations in order to secure  
27  
28 119 field access and feasibility. Patient organizations were approached for that purpose. All gave us  
29  
30 120 positive feedback on the study aims, acknowledging that more research is needed on patients'  
31 121 experiences related to patient-centered care. Thus, patient organizations supported recruitment of  
32 122 study participants by disseminating advertisement for study participation. No individual patient was  
33  
34 123 involved in recruitment and conduct of the study. All study participants and every interested person  
35  
36 124 in the public have the possibility to read and download regular project updates and study results on  
37  
38 125 the project website (<http://www.ham-net.de/de/projekte/projekt-aspired.html>).  
39  
40 126

### 41 127 **Data analyses**

43 128 For the ratings, median, mean and standard deviation were calculated for all participants using SPSS  
44  
45 129 (Version 21) [21]. Demographic data were analyzed accordingly, except for nominal items where we  
46  
47 130 calculated frequencies. Consensus was examined by calculating distributions of answers per tertile  
48  
49 131 (1-3; 4-6; 7-9) in comparison to Zill et al. [11]. We compared different subgroups due to potential  
50 132 differences in using the health care system including age groups (18-30 (young); 31-65 (middle aged);  
51 133 over 65 (older)), way of participation (mail vs. online) and morbidity (single disease vs. multi-  
52  
53 134 morbidity). Open answers were analyzed, summarized by two researchers and the student assistant  
54  
55 135 (SZ, EC, TK), and reviewed in a group discussion (SZ, EC, IS).  
56  
57 136

## 58 137 **RESULTS**

### 59 138 **Adaptation of the integrative model into a comprehensible version**

139 Within cognitive interviews, each participant understood generally well the patient version of  
 140 patient-centeredness (first version). Some participants wanted easier terms (e.g. treatment  
 141 (“Behandlung”) instead of health care (“Gesundheitsversorgung”). We tested two versions: version  
 142 A wasn’t directed towards patients (“Patients can contact *their* health care provider easily”), version  
 143 B was directed towards patients (“You can contact *your* health care provider easily”). Nine out of ten  
 144 participants preferred personal pronouns (version B); thus, we adapted accordingly.

145

## 146 Delphi study

### 147 Characteristics of patients from the Delphi study

148 262 patients, who reacted to the community-based recruitment strategies, fulfilled the inclusion  
 149 criteria and were invited to participate via letter or online in the first round of the Delphi study after  
 150 having expressed interest in study participation. In the first round, 226 patients participated  
 151 (response rate = 86.26%), and in the second round, 214 patients participated (final response rate =  
 152 81.7%). Thus, the final sample consisted of 214 patients (drop-out rates: from invitation to first  
 153 round: n = 36 (13.7%); from invitation to second round: n = 48 (18.3%); from first to second round: n  
 154 = 12 (5.3%)). Mean age was 52 years (normally distributed), and two thirds were female. Further  
 155 information on participants’ demographic and clinical characteristics is displayed in Table 1.

156

157 **Table 1**

158 Demographic and clinical characteristics of participants of the first round (N = 226)

| Characteristic                                       | Frequency              |
|------------------------------------------------------|------------------------|
| Age (in years)                                       | M = 51.79 (SD = 16.46) |
| Sex                                                  |                        |
| <i>Female</i>                                        | 149 (65.9 %)           |
| <i>Male</i>                                          | 76 (33.6 %)            |
| First language                                       |                        |
| <i>German</i>                                        | 219 (96.9 %)           |
| <i>Other</i>                                         | 5 (2.2 %)              |
| Chronic disease group<br>(multiple answers possible) |                        |
| <i>Cancer</i>                                        | 36 (15.3 %)            |
| <i>Cardiovascular disease</i>                        | 90 (39.8 %)            |
| <i>Mental disorder</i>                               | 117 (51.8 %)           |
| <i>Musculoskeletal disorder</i>                      | 114 (50.4 %)           |
| <i>Others<sup>a</sup></i>                            | 149 (67.4 %)           |



|                            |                      |
|----------------------------|----------------------|
| Residence                  |                      |
| <i>Hamburg</i>             | 59 (26.1 %)          |
| <i>Other</i>               | 167 (73.9 %)         |
| Health status <sup>b</sup> | M = 2.49 (SD = 0.77) |

**Note:** M = Mean. SD = Standard Deviation.

*a* = Additional to one of the four groups mentioned above

*b* = Health status was assessed with the item "How would you assess your health status in general?" ranging from 1 = *excellent* to 5 = *bad*.

### Results of round 1

In Table 2, results from the first round of the ratings of relevance and degree of current implementation are shown. Regarding ratings of relevance, 13 out of 15 dimensions showed the maximum median of 9. The dimensions "patient as a unique person", "clinician-patient relationship", "clinician-patient communication", "access to care" and "physical support" showed highest means (range from 8.46 to 8.31). Every dimension showed consensus of > 50% for tertile seven to nine (i.e. majority of patients rated within the highest tertile). Regarding the current degree of implementation, 3 out of 15 dimensions showed a median of 6 ("clinician-patient relationship", "clinician-patient communication", and "physical support"). All other dimensions showed a median of 5. The dimensions with the highest means were the same as those with the highest medians. Regarding consensus, every dimension had a rating of > 50% for the tertile from four to six.

**Table 2**

Results for the assessment of relevance and implementation from the first round

|                                                                               | Relevance |             | Implementation |             |
|-------------------------------------------------------------------------------|-----------|-------------|----------------|-------------|
|                                                                               | Median    | M (SD)      | Median         | M (SD)      |
| <b>1. Patient-centered characteristics of health care providers</b>           | 9         | 8.46 (0.90) | 5              | 5.30 (1.44) |
| <b>2. Trustful relationship</b>                                               | 9         | 8.41 (0.94) | 6              | 5.61 (1.72) |
| <b>3. Uniqueness of each patient</b>                                          | 9         | 8.31 (1.11) | 5              | 5.21 (1.74) |
| <b>4. Consideration of personal circumstances</b>                             | 9         | 8.15 (1.23) | 5              | 4.77 (1.86) |
| <b>5. Appropriate communication</b>                                           | 9         | 8.31 (0.97) | 6              | 5.56 (1.74) |
| <b>6. Integration of additional health care elements</b>                      | 8         | 7.34 (1.81) | 5              | 4.56 (1.99) |
| <b>7. Teamwork of health care providers</b>                                   | 9         | 8.29 (1.18) | 5              | 5.08 (1.90) |
| <b>8. Access to care</b>                                                      | 9         | 8.31 (0.99) | 5              | 4.88 (2.08) |
| <b>9. Good planning of care</b>                                               | 9         | 8.30 (1.04) | 5              | 5.25 (1.92) |
| <b>10. Personally tailored information</b>                                    | 9         | 8.27 (1.12) | 5              | 5.10 (1.87) |
| <b>11. Collaboration as equal partners and involvement in decision making</b> | 9         | 8.25 (1.11) | 5              | 5.15 (2.04) |
| <b>12. Involvement of family and friends</b>                                  | 7         | 6.92 (2.16) | 5              | 4.91 (2.21) |
| <b>13. Empowerment of patients</b>                                            | 9         | 8.20 (1.13) | 5              | 5.23 (1.97) |
| <b>14. Support of physical wellbeing</b>                                      | 9         | 8.31 (0.98) | 6              | 5.58 (1.95) |
| <b>15. Support of mental wellbeing</b>                                        | 9         | 8.12 (1.35) | 5              | 4.83 (1.98) |

1  
2  
3 178 Sixty participants responded to the open-ended questions. Comments referred to additional aspects,  
4  
5 179 including time issues within health care (e.g. “Neither nurses, nor doctors have enough time for the  
6  
7 180 patients”), financial aspects (“without additional costs for people living in poverty”) and medication  
8  
9 181 plans (“discussing medication plans is too fast” or “more information about side effects”). We revised  
10  
11 182 descriptions after the first round according to the most frequent comments (third version). German  
12  
13 183 descriptions of dimensions used in round 2, in which changes from the second to third version are  
14  
15 184 highlighted, are listed in the appendix A1.

15 185 A few patients stated that patient safety could be improved by better coordination of medication  
16  
17 186 plans. Furthermore, patient safety was already depicted as part of the dimension “physical support”  
18  
19 187 in the model [11]. Due to comments, we revised the model to add “patient safety” as a separate 16<sup>th</sup>  
20  
21 188 dimension.  
22

23

## 190 Results of round 2

24  
25 191 In round 2, most ratings were very similar to the first round and medians did not change (see table  
26  
27 192 3). The added dimension of patient safety was also considered important but currently insufficiently  
28  
29 193 implemented. The adaptations we made based on the feedback were rated as “better than before”  
30  
31 194 (all means over 7). This time, most important dimensions were “patient safety”, “teamwork and  
32  
33 195 team building”, “access to care”, “patient information”, and “essential characteristics of clinicians”.  
34  
35 196 “Clinician-patient communication”, “clinician-patient relationship”, and “physical support” again  
36  
37 197 reached the best ratings regarding implementation. Additionally, the newly added dimension  
38  
39 198 “patient safety” also reached equally high ratings.  
40

41

40 **Table 3**

42 201 Results for the assessment of adaptation, relevance and implementation of the second round

|                                                                     | Adaptation (round one to round two) |      |      | Relevance |      |      | Implementation |      |      |
|---------------------------------------------------------------------|-------------------------------------|------|------|-----------|------|------|----------------|------|------|
|                                                                     | Median                              | M    | SD   | Median    | M    | SD   | Median         | M    | SD   |
| <b>1. Patient-centered characteristics of health care providers</b> | -                                   | -    | -    | 9         | 8,36 | 1,30 | 5              | 5,27 | 1,38 |
| <b>2. Trustful relationship</b>                                     | 8                                   | 7,64 | 1,59 | 9         | 8,18 | 1,34 | 6              | 5,47 | 1,44 |
| <b>3. Uniqueness of each patient</b>                                | -                                   | -    | -    | 9         | 8,30 | 1,24 | 5              | 5,17 | 1,50 |
| <b>4. Consideration of personal circumstances</b>                   | 8                                   | 7,14 | 1,80 | 9         | 8,07 | 1,36 | 5              | 4,83 | 1,61 |
| <b>5. Appropriate communication</b>                                 | -                                   | -    | -    | 9         | 8,33 | 1,12 | 6              | 5,62 | 1,54 |
| <b>6. Integration of additional health care elements</b>            | -                                   | -    | -    | 8         | 7,46 | 1,67 | 5              | 4,61 | 1,81 |
| <b>7. Teamwork of health care providers</b>                         | -                                   | -    | -    | 9         | 8,45 | 1,04 | 5              | 5,08 | 1,75 |
| <b>8. Access to care</b>                                            | 8                                   | 7,79 | 1,59 | 9         | 8,38 | 1,09 | 5              | 4,81 | 1,83 |
| <b>9. Good planning of care</b>                                     | 8                                   | 7,28 | 1,82 | 9         | 8,18 | 1,28 | 5              | 5,07 | 1,73 |
| <b>10. Patient safety</b>                                           | -                                   | -    | -    | 9         | 8,56 | 0,94 | 6              | 5,61 | 1,64 |

|    |     |  |  |  |  |  |  |  |  |  |
|----|-----|--|--|--|--|--|--|--|--|--|
| 11 | 202 |  |  |  |  |  |  |  |  |  |
| 12 | 203 |  |  |  |  |  |  |  |  |  |
| 13 | 204 |  |  |  |  |  |  |  |  |  |
| 14 | 205 |  |  |  |  |  |  |  |  |  |
| 15 | 206 |  |  |  |  |  |  |  |  |  |
| 16 | 207 |  |  |  |  |  |  |  |  |  |
| 17 | 208 |  |  |  |  |  |  |  |  |  |
| 18 | 209 |  |  |  |  |  |  |  |  |  |
| 19 | 210 |  |  |  |  |  |  |  |  |  |
| 20 | 211 |  |  |  |  |  |  |  |  |  |
| 21 | 212 |  |  |  |  |  |  |  |  |  |
| 22 | 213 |  |  |  |  |  |  |  |  |  |
| 23 | 214 |  |  |  |  |  |  |  |  |  |
| 24 | 215 |  |  |  |  |  |  |  |  |  |
| 25 | 216 |  |  |  |  |  |  |  |  |  |
| 26 | 217 |  |  |  |  |  |  |  |  |  |
| 27 | 218 |  |  |  |  |  |  |  |  |  |
| 28 | 219 |  |  |  |  |  |  |  |  |  |
| 29 | 220 |  |  |  |  |  |  |  |  |  |
| 30 | 221 |  |  |  |  |  |  |  |  |  |
| 31 | 222 |  |  |  |  |  |  |  |  |  |
| 32 | 223 |  |  |  |  |  |  |  |  |  |
| 33 | 224 |  |  |  |  |  |  |  |  |  |
| 34 | 225 |  |  |  |  |  |  |  |  |  |
| 35 | 226 |  |  |  |  |  |  |  |  |  |
| 36 | 227 |  |  |  |  |  |  |  |  |  |
| 37 | 228 |  |  |  |  |  |  |  |  |  |
| 38 | 229 |  |  |  |  |  |  |  |  |  |
| 39 | 230 |  |  |  |  |  |  |  |  |  |
| 40 |     |  |  |  |  |  |  |  |  |  |
| 41 |     |  |  |  |  |  |  |  |  |  |
| 42 |     |  |  |  |  |  |  |  |  |  |
| 43 |     |  |  |  |  |  |  |  |  |  |
| 44 |     |  |  |  |  |  |  |  |  |  |
| 45 |     |  |  |  |  |  |  |  |  |  |
| 46 |     |  |  |  |  |  |  |  |  |  |
| 47 |     |  |  |  |  |  |  |  |  |  |
| 48 |     |  |  |  |  |  |  |  |  |  |
| 49 |     |  |  |  |  |  |  |  |  |  |
| 50 |     |  |  |  |  |  |  |  |  |  |
| 51 |     |  |  |  |  |  |  |  |  |  |
| 52 |     |  |  |  |  |  |  |  |  |  |
| 53 |     |  |  |  |  |  |  |  |  |  |
| 54 |     |  |  |  |  |  |  |  |  |  |
| 55 |     |  |  |  |  |  |  |  |  |  |
| 56 |     |  |  |  |  |  |  |  |  |  |
| 57 |     |  |  |  |  |  |  |  |  |  |
| 58 |     |  |  |  |  |  |  |  |  |  |
| 59 |     |  |  |  |  |  |  |  |  |  |
| 60 |     |  |  |  |  |  |  |  |  |  |

### Subgroup analyses

In every chronic disease group, distribution of patients participating via mail or online was similar (approx. 45:55 ratio, respectively). There was no major age difference between mail- and online-based participation (mean age (mail): 54.83 years (SD = 17.85), mean age (online): 49.35 years (SD = 14.88)). Due to small sizes of sub-samples (e.g. only 6 patients indicated to only have cancer), differences in ratings depending on chronic disease groups could not be analyzed (i.e. via analysis of variance). Neither multi-morbidity (at least two chronic disease groups indicated compared to only one), nor type of participation (mail vs. online) did affect assessment of relevance and implementation by patients. That is, there were no differences between means bigger than 1. The only differences of means above 1 were found within different age groups. The implementation of “access to care” was rated lower by young patients in comparison to older patients (M = 4.37 for young vs. M = 5.38 for older patients). Implementation of “patient information” was also rated lower by young patients (M = 4.70 for young vs. M = 5.71 for older patients).

### DISCUSSION

In our study, we have assessed relevance and current degree of implementation of different dimensions of PC in the German health care system from the patients’ perspective. The findings show that patients consider every dimension of PC very relevant but currently only mediocly implemented. Furthermore, there were no evident factors influencing these results (e.g. way of participation or multi-morbidity).

These results point out the importance to ask patients when investigating PC. Comparing this assessment with the experts’ ratings of the same dimensions from the same model [11], differences between expert and patient ratings become evident. For example, experts did not rate each dimension as very relevant but patients did (e.g. involvement of family and friends which was less relevant to experts but patients considered it important). This discrepancy is important for development of strategies to foster implementation of PC. If only the experts’ perspective is known, implementation efforts might not match patient needs. Consequently, a more patient-centered care can only be achieved by taking into account patients’ perspectives.

1  
2  
3 231 First of all, in addition to the aforementioned experts' rating of the model, this study provides the  
4  
5 232 assessment from the patients' perspective and enriches thus the construct of PC. Most importantly,  
6  
7 233 by asking patients about relevance and implementation, we highlight not only the major gap  
8  
9 234 between perceived relevance of PC. Also, we portray the actual extent of PC in the German health  
10  
11 235 care system from the patients' perspective. Furthermore, findings of this study can be used on a  
12  
13 236 more scientific level. These results can function as the basis for development of questionnaires by  
14  
15 237 weighing different items respective to ratings of the corresponding dimension. For example,  
16  
17 238 dimensions with higher ratings of relevance could be better represented with more items than less  
18  
19 239 relevant dimensions.

### 240 **Strengths and limitations**

20 241 Major strengths of this study are the diverse sample from all over Germany and the possibility to  
21  
22 242 anonymously generate a group consensus by performing a Delphi study. By doing so, ratings of each  
23  
24 243 individual weren't affected by dominant people in group discussions, and therefore, are more likely  
25  
26 244 to be unbiased. Nonetheless, there was little variation within ratings of relevance of the dimensions  
27  
28 245 of PC. This could indicate a lack of specification in the descriptions. Patients might have been unable  
29  
30 246 to differentiate between sub-aspects of a single description. Thus, they might have rated the whole  
31  
32 247 dimension as relevant even if they considered only some parts relevant enough to give a high score.  
33  
34 248 Therefore, additional qualitative approaches (e.g. by conducting semi-structured interviews) could  
35  
36 249 help to enrich findings and further explain results by specifying relevant aspects instead of broad  
37  
38 250 dimensions.

### 37 **Conclusions**

38 252 In summary, our study provides the patients' perspective on PC and enriches current  
39  
40 253 conceptualization of PC. We showed that patients consider every dimension of PC important, but  
41  
42 254 currently not well implemented. Regarding the status quo, especially in Germany, we therefore still  
43  
44 255 need to make efforts since patients don't receive the patient-centered health care they consider so  
45  
46 256 important.

47 257

48 258

49 259

50 260

51 261

52 262

53 263

54 264

55 265

1  
2  
3 266  
4  
5 267  
6  
7 268  
8  
9 269  
10  
11 270  
12 271  
13 272  
14  
15 273  
16  
17 274  
18  
19 275  
20 276  
21  
22 277  
23 278  
24  
25 279  
26  
27 280  
28  
29 281  
30 282  
31  
32 283  
33 284  
34  
35 285  
36  
37 286  
38  
39 287  
40 288  
41  
42 289  
43 290  
44  
45 291  
46  
47 292  
48  
49 293  
50 294  
51  
52 295  
53 296  
54  
55 297  
56  
57 298  
58 299  
59  
60 300

## REFERENCES

- 1 Härter M, Dirmaier J, Scholl I, *et al*. The long way of implementing patient-centered care and shared decision making in Germany. *Z Evid Fortbild Qual Gesundheitswes* 2017;**123–124**:46–51. doi:10.1016/j.zefq.2017.05.006
- 2 Bundesrat. *Gesetzesbeschluss des deutschen Bundestages. Gesetz zur Verbesserung der Rechte von Patientinnen und Patienten (Patientenrechtegesetz)*. Retrieved from [http://www.bmjv.de/SharedDocs/Downloads/DE/pdfs/Gesetze/Gesetz\\_zur\\_Verbesserung\\_der\\_Rechte\\_von\\_Patientinnen\\_und\\_Patienten.pdf;jsessionid=1185B669A9CD4A090FDE13ABA75890D2.1\\_cid297?\\_\\_blob=publicationFile](http://www.bmjv.de/SharedDocs/Downloads/DE/pdfs/Gesetze/Gesetz_zur_Verbesserung_der_Rechte_von_Patientinnen_und_Patienten.pdf;jsessionid=1185B669A9CD4A090FDE13ABA75890D2.1_cid297?__blob=publicationFile) [cited 2014 04.12.2014]: 2013.
- 3 Baumgart J. Ambivalentes Verhältnis. *Dtsch Arztebl* 2010;**107**:2554–7.
- 4 Rathert C, Wyrwich MD, Boren SA. Patient-centered care and outcomes: a systematic review of the literature. *Med care Res Rev* 2013;**70**:351–79. doi:10.1177/1077558712465774
- 5 Epstein RM, Franks P, Fiscella K, *et al*. Measuring patient-centered communication in patient-physician consultations: Theoretical and practical issues. *Soc Sci Med* 2005;**61**:1516–28.
- 6 Mead N, Bower P. Patient-centredness: A conceptual framework and review of the empirical literature. *Soc Sci Med* 2000;**51**:1087–110.
- 7 Ouwens M, Hermens R, Hulscher M, *et al*. Development of indicators for patient-centred cancer care. *Support Care cancer* 2010;**18**:121.
- 8 Stewart MA, Brown JB, Weston W, *et al*. *Patient-centered medicine - Transforming the clinical method*. Abingdon: : Radcliffe Medical Press 2003.
- 9 Scholl I, Zill JM, Härter M, *et al*. An integrative model of patient-centeredness - A systematic review and concept analysis. *PLoS One* 2014;**9**:e107828. doi:10.1371/journal.pone.0107828
- 10 van Dulmen S. Patient-centredness. *Patient Educ Couns* 2003;**51**:195–6. doi:10.1016/S0738-3991(03)00039-9
- 11 Zill JM, Scholl I, Harter M, *et al*. Which Dimensions of Patient-Centeredness Matter? - Results of a Web-Based Expert Delphi Survey. *PLoS One* 2015;**10**:e0141978. doi:10.1371/journal.pone.0141978
- 12 Bensing J, Rimondini M, Visser A. What patients want. *Patient Educ Couns* 2013;**90**:287–90. doi:10.1016/j.pec.2013.01.005
- 13 Hudon C, Fortin M, Haggerty J, *et al*. Patient-centered care in chronic disease management: a

- 1  
2  
3 301 thematic analysis of the literature in family medicine. *Patient Educ Couns* 2012;**88**:170–6.  
4  
5 302 doi:10.1016/j.pec.2012.01.009  
6  
7 303 14 Luxford K. What does the patient know about quality? *Int J Qual Heal Care* 2012;**24**:439–40.  
8  
9 304 doi:10.1093/intqhc/mzs053  
10 305 15 Maassen EF, Schrevel SJC, Dedding CWM, *et al.* Comparing patients' perspectives of "good  
11 306 care" in Dutch outpatient psychiatric services with academic perspectives of patient-centred  
12 307 care. *J Ment Heal* 2017;**26**:84–94. doi:10.3109/09638237.2016.1167848  
13  
14  
15 308 16 Yasein NA, Shakhathreh FM, Shroukh WA, *et al.* A Comparison between Patients' and  
16 309 Residents' Perceptions of Patient Centeredness and Communication Skills among Physicians  
17 310 Working at Jordan University Hospital. *Open J Nurs* 2017;**07**:698–706.  
18 311 doi:10.4236/ojn.2017.76052  
19  
20 312 17 Boulkedid R, Abdoul H, Loustau M, *et al.* Using and reporting the delphi method for selecting  
21 313 healthcare quality indicators: A systematic review. *PLoS One* 2011;**6**:e20476.  
22 314 doi:10.1371/journal.pone.0020476  
23  
24  
25 315 18 Hasson F, Keeney S, McKenna H. Research guidelines for the Delphi survey technique. *J Adv*  
26 316 *Nurs* 2000;**32**:1008–15.  
27  
28 317 19 Soziales B für A und. Leichte Sprache. 2014.  
29  
30 318 20 Limesurvey GmbH. An Open Source survey tool /LimeSurvey GmbH, Hamburg, Germany.  
31 319 21 IBM SPSS Statistics for Windows. 2015.  
32  
33  
34  
35 320  
36 321  
37 322  
38 323  
39 324  
40 325  
41 326  
42 327  
43 328  
44 329  
45 330  
46 331  
47 332  
48 333  
49 334  
50 335  
51  
52  
53  
54  
55  
56  
57  
58  
59  
60

1  
2  
3 336  
4  
5 337  
6 338  
7  
8 339  
9  
10 340  
11 341  
12  
13 342  
14  
15 343  
16 344  
17  
18 345  
19  
20 346  
21  
22 347  
23 348  
24  
25 349  
26  
27 350  
28  
29 351  
30 352  
31  
32 353  
33  
34 354  
35  
36 355  
37  
38 356  
39  
40 357  
41  
42 358  
43  
44 359  
45  
46 360  
47  
48 361  
49  
50 362  
51  
52 363  
53  
54 364  
55  
56 365  
57  
58 366  
59  
60 367  
368  
369  
370

#### **AUTHOR STATEMENT**

IS is the responsible principle investigator of the study. IS, PH and MH were involved in planning and preparation of the study. SZ and EC recruited participants and collected data, SZ analyzed the data. SZ, IS, EC and PH interpreted the results. SZ wrote the first draft of the manuscript. IS, EC, PH, MH critically revised the manuscript for important intellectual content. All authors gave final approval of the version to be published and agree to be accountable for the work.

#### **DATA STATEMENT**

Corresponding with data transparency, data files can be made available with adaptations (pseudonyms and comments deleted due to data security) upon contacting the authors.

#### **CONFLICT OF INTERESTS**

PH gave one scientific presentation on shared decision-making during a lunch symposium, for which she received compensation and travel compensation from GlaxoSmithKline GmbH (pharmaceutical company) in 2018. The other authors declare that they have no competing interests.

#### **FUNDING STATEMENT**

This study is funded by the German Federal Ministry of Education and Research (Bundesministerium für Bildung und Forschung – BMBF) with the grant number 01GY1614. The funder had no role in decision to publish or preparation of the manuscript.

#### **ACKNOWLEDGEMENT**

We thank our student assistant Tanja Kloster and our research intern Lara Dreyer for supporting us preparing the manuscript and transcribing the interviews.

#### **ETHICS APPROVAL AND CONSENT TO PARTICIPATE**

The study was carried out according to the latest version of the Helsinki Declaration of the World Medical Association. Principles of good scientific practice were respected. The study had been approved by the Ethics Committee of the Medical Association Hamburg (study ID: PV5724). Study participation was voluntary and no foreseeable risks for participants resulted from the participation in

1  
2  
3 371 this study. Participants were fully informed about the aims of the study, data collection, and the use  
4  
5 372 of collected data. Written informed consent was obtained prior to participation. Preserving principles  
6  
7 373 of data sensitivity, data protection, and confidentiality requirements were met.

8 374

9 375

10 376 **APPENDIX**

11 377 A1: Descriptions of the dimensions of PC (mail-based version)

12 378

13 379 [Insert A1 here]

14 380

15  
16  
17  
18  
19  
20  
21  
22  
23  
24  
25  
26  
27  
28  
29  
30  
31  
32  
33  
34  
35  
36  
37  
38  
39  
40  
41  
42  
43  
44  
45  
46  
47  
48  
49  
50  
51  
52  
53  
54  
55  
56  
57  
58  
59  
60

For peer review only



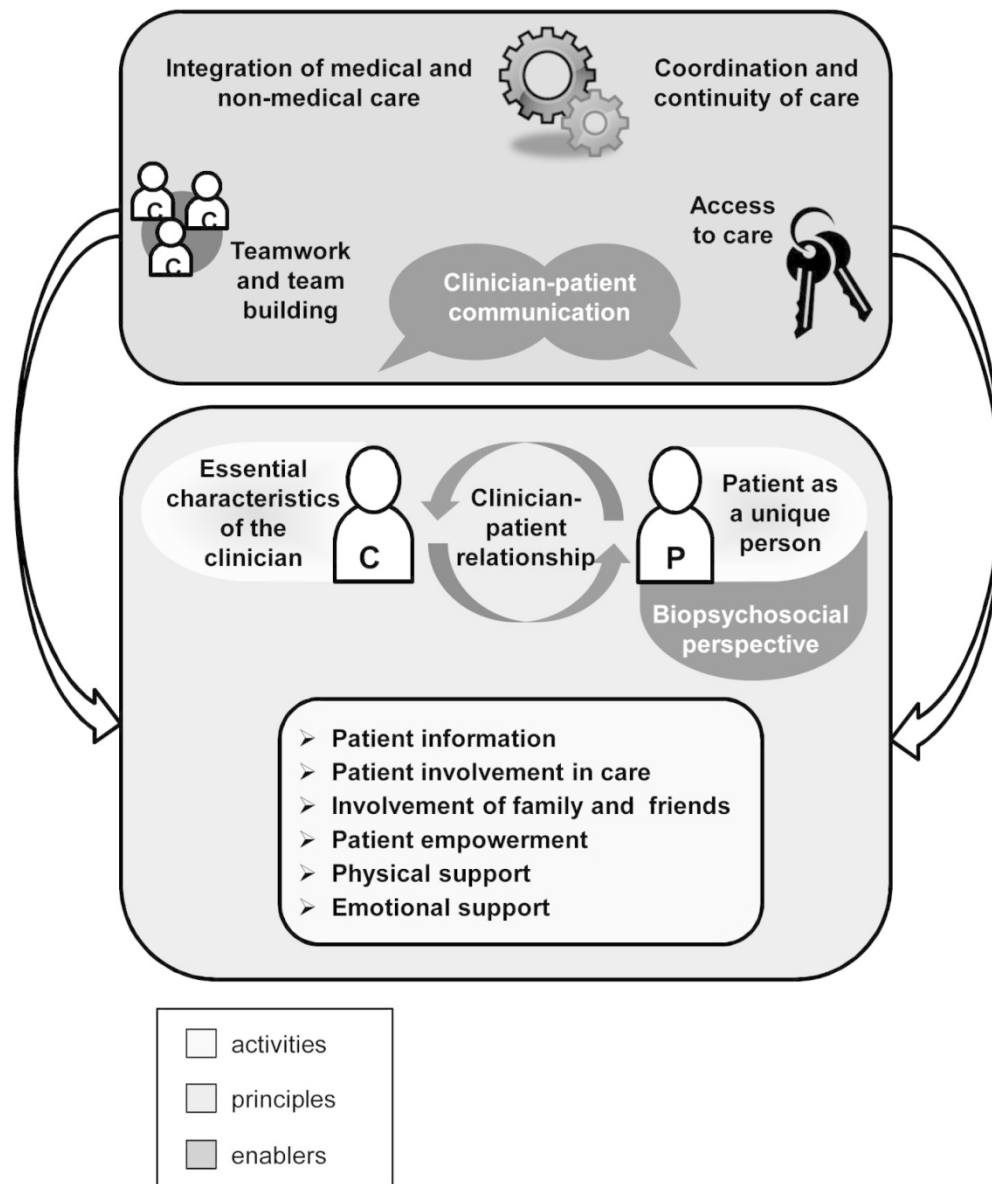

Figure 1. Integrative model of patient-centeredness

119x142mm (300 x 300 DPI)

Teilnehmercode: X

## Fragebogen für Patientinnen und Patienten

### Projekt „Patientenerfahrungen im Gesundheitswesen“

**Liebe Patientin, lieber Patient,**

Wir danken Ihnen herzlich für Ihre Antworten zu dem ersten Fragebogen. Wir haben uns Ihre Antworten durchgelesen und gemeinsam besprochen. Die häufigsten Rückmeldungen haben wir versucht einzuarbeiten. Das heißt, dass wir die Beschreibungen teilweise geändert haben. Die Änderungen haben wir jeweils **gelb** markiert. Außerdem ist ein Bestandteil, nämlich „Patientensicherheit“, neu hinzugekommen. Wir möchten Sie bitten, zu bewerten, ob Sie die Beschreibungen mit den Veränderungen besser oder schlechter finden.

Außerdem sehen Sie zu jedem Bestandteil Ihre Bewertung aus dem ersten Fragebogen sowie die Bewertung aller Teilnehmenden. Wir möchten Sie bitten, die Wichtigkeit und die Umsetzung aller Bestandteile noch einmal zu bewerten.

Wir verstehen, dass die Beschreibungen viele verschiedene Punkte beinhalten und es Ihnen deshalb manchmal schwerfällt, sie insgesamt zu bewerten. Besonders bei der Frage nach der Umsetzung kann das schwierig sein, weil Sie mit verschiedenen Behandlerinnen und Behandlern unterschiedliche Erfahrungen gemacht haben. Bitte versuchen Sie dennoch alles gemeinsam im Mittel zu bewerten.

Es gibt keine richtigen oder falschen Antworten.

Wenn Sie den Fragebogen ausgefüllt haben, stecken Sie ihn bitte in den beigefügten Briefumschlag, verschließen ihn und versenden ihn (die Versandgebühr zahlt das Universitätsklinikum).

Wir freuen uns sehr, dass Sie an der Befragung teilnehmen. Bereits an dieser Stelle danken wir Ihnen ganz herzlich für Ihre Unterstützung.



Dr. phil. Isabelle Scholl  
(Projektleiterin)



Stefan Zeh, M.Sc.  
(Projektmitarbeiter)



Eva Christalle, M.Sc.  
(Projektmitarbeiterin)

## Überblick der Bestandteile von Patientenorientierung:

### I. Patientenorientierte Grundhaltung

1. Patientenorientierte Merkmale der Behandler/innen
2. Vertrauensvolles Miteinander
3. Einzigartigkeit jeder Patientin/ jedes Patienten
4. Berücksichtigung der Lebensumstände

### II. Rahmenbedingungen der Patientenorientierung

5. Angemessene Kommunikation
6. Einbezug ergänzender Angebote
7. Zusammenarbeit von Behandlern
8. Zugang zur Behandlung
9. Gute Planung der Behandlung

#### 10. Patientensicherheit

### III. Konkrete Handlungen und Maßnahmen

11. Persönlich angepasste Informationen
12. Gleichberechtigte Zusammenarbeit und Beteiligung bei Entscheidungen
13. Beteiligung von Familie und Freunden
14. Aktivierung der Patientinnen und Patienten
15. Unterstützung des körperlichen Wohlbefindens
16. Unterstützung des psychischen Wohlbefindens

#### **Vorbemerkung:**

Behandler/innen meint alle Berufsgruppen, die sich um Patientinnen und Patienten kümmern. Dies sind zum Beispiel Ärztinnen und Ärzte, Pflegefachkräfte, Physiotherapeutinnen und Physiotherapeuten sowie Psychologinnen und Psychologen. Da wir eine möglichst kurze Beschreibung verwenden möchten, haben wir uns für einen Sammelbegriff entschieden. In Ihrer Behandlung sind vielleicht alle genannten Berufsgruppen beteiligt, möglicherweise sogar noch mehr. Wenn Sie daher „Behandlerin“ oder „Behandler“ lesen, bitte denken Sie dabei an alle behandelnden Berufsgruppen, die an Ihrer Behandlung beteiligt sind.

## I. Patientenorientierte Grundhaltung

### 1. Patientenorientierte Merkmale der Behandler/innen

Die Behandler/innen sind:

- einfühlsam
- ehrlich
- wertschätzend

Die Behandler/innen sind sich des eigenen Verhaltens und der eigenen Gefühle bewusst. Die Behandler/innen verfügen über eine gute fachliche Kompetenz.

Bewertung der Wichtigkeit durch alle Teilnehmenden im Mittel: **X**

Ihre persönliche Bewertung der Wichtigkeit: **X**

a) Wie wichtig finden Sie diesen Bestandteil?

|               |                          |                          |                          |                          |                          |                          |                          |                          |                          |         |
|---------------|--------------------------|--------------------------|--------------------------|--------------------------|--------------------------|--------------------------|--------------------------|--------------------------|--------------------------|---------|
| Überhaupt     | <input type="checkbox"/> | Äußerst |
| nicht wichtig | 1                        | 2                        | 3                        | 4                        | 5                        | 6                        | 7                        | 8                        | 9                        | wichtig |

Bewertung der Umsetzung durch alle Teilnehmenden im Mittel: **X**

Ihre persönliche Bewertung der Umsetzung: **X**

b) Wie gut ist dieser Bestandteil Ihrer Erfahrung nach derzeit in Deutschland umgesetzt?

|                 |                          |                          |                          |                          |                          |                          |                          |                          |                          |             |
|-----------------|--------------------------|--------------------------|--------------------------|--------------------------|--------------------------|--------------------------|--------------------------|--------------------------|--------------------------|-------------|
| Überhaupt       | <input type="checkbox"/> | Vollständig |
| nicht umgesetzt | 1                        | 2                        | 3                        | 4                        | 5                        | 6                        | 7                        | 8                        | 9                        | umgesetzt   |

### 2. Vertrauensvolles Miteinander

Es besteht ein vertrauensvolles Miteinander zwischen Ihnen und der Behandlerin / dem Behandler. Wenn möglich gibt es gleichbleibende Ansprechpartner/innen. **Vor dem Gespräch informiert sich die Behandlerin / der Behandler über Ihren bisherigen Erkrankungsverlauf. Die Behandlerin / der Behandler spricht Sie auf bestehende Beschwerden und Ihr aktuelles Befinden an.**

a) Finden Sie, dass die Beschreibung mit den Veränderungen besser oder schlechter ist?

|            |                          |                          |                          |                          |                          |                          |                          |                          |                          |           |
|------------|--------------------------|--------------------------|--------------------------|--------------------------|--------------------------|--------------------------|--------------------------|--------------------------|--------------------------|-----------|
| Sehr viel  | <input type="checkbox"/> | Sehr viel |
| schlechter | 1                        | 2                        | 3                        | 4                        | 5                        | 6                        | 7                        | 8                        | 9                        | besser    |

Bewertung der Wichtigkeit durch alle Teilnehmenden im Mittel: **X**

Ihre persönliche Bewertung der Wichtigkeit: **X**

b) Wie wichtig finden Sie diesen Bestandteil?

|               |                          |                          |                          |                          |                          |                          |                          |                          |                          |         |
|---------------|--------------------------|--------------------------|--------------------------|--------------------------|--------------------------|--------------------------|--------------------------|--------------------------|--------------------------|---------|
| Überhaupt     | <input type="checkbox"/> | Äußerst |
| nicht wichtig | 1                        | 2                        | 3                        | 4                        | 5                        | 6                        | 7                        | 8                        | 9                        | wichtig |

Bewertung der Umsetzung durch alle Teilnehmenden im Mittel: **X**

Ihre persönliche Bewertung der Umsetzung: **X**

c) Wie gut ist dieser Bestandteil Ihrer Erfahrung nach derzeit in Deutschland umgesetzt?

|                 |                          |                          |                          |                          |                          |                          |                          |                          |                          |             |
|-----------------|--------------------------|--------------------------|--------------------------|--------------------------|--------------------------|--------------------------|--------------------------|--------------------------|--------------------------|-------------|
| Überhaupt       | <input type="checkbox"/> | Vollständig |
| nicht umgesetzt | 1                        | 2                        | 3                        | 4                        | 5                        | 6                        | 7                        | 8                        | 9                        | umgesetzt   |

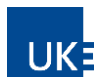

### 3. Einzigartigkeit jeder Patientin/ jedes Patienten

Die Behandler/innen gehen ein auf:

- Bedürfnisse
- Wünsche
- Sorgen
- Erwartungen

Sie erkennen an, dass Menschen verschieden sind.

Bewertung der Wichtigkeit durch alle Teilnehmenden im Mittel: **X**

Ihre persönliche Bewertung der Wichtigkeit: **X**

a) Wie wichtig finden Sie diesen Bestandteil?

|               |                          |                          |                          |                          |                          |                          |                          |                          |                          |         |
|---------------|--------------------------|--------------------------|--------------------------|--------------------------|--------------------------|--------------------------|--------------------------|--------------------------|--------------------------|---------|
| Überhaupt     | <input type="checkbox"/> | Äußerst |
| nicht wichtig | 1                        | 2                        | 3                        | 4                        | 5                        | 6                        | 7                        | 8                        | 9                        | wichtig |

Bewertung der Umsetzung durch alle Teilnehmenden im Mittel: **X**

Ihre persönliche Bewertung der Umsetzung: **X**

b) Wie gut ist dieser Bestandteil Ihrer Erfahrung nach derzeit in Deutschland umgesetzt?

|                 |                          |                          |                          |                          |                          |                          |                          |                          |                          |             |
|-----------------|--------------------------|--------------------------|--------------------------|--------------------------|--------------------------|--------------------------|--------------------------|--------------------------|--------------------------|-------------|
| Überhaupt       | <input type="checkbox"/> | Vollständig |
| nicht umgesetzt | 1                        | 2                        | 3                        | 4                        | 5                        | 6                        | 7                        | 8                        | 9                        | umgesetzt   |

### 4. Berücksichtigung der Lebensumstände

Die Behandler/innen sehen Sie als ganze Menschen. Es werden bei der Behandlung alle Lebensbereiche einbezogen.

Beispiele dafür sind:

- Körper
- Psyche/ Seele
- Familie und Freunde
- Beruf und Freizeit

a) Finden Sie, dass die Beschreibung mit den Veränderungen besser oder schlechter ist?

|            |                          |                          |                          |                          |                          |                          |                          |                          |                          |           |
|------------|--------------------------|--------------------------|--------------------------|--------------------------|--------------------------|--------------------------|--------------------------|--------------------------|--------------------------|-----------|
| Sehr viel  | <input type="checkbox"/> | Sehr viel |
| schlechter | 1                        | 2                        | 3                        | 4                        | 5                        | 6                        | 7                        | 8                        | 9                        | besser    |

Bewertung der Wichtigkeit durch alle Teilnehmenden im Mittel: **X**

Ihre persönliche Bewertung der Wichtigkeit: **X**

b) Wie wichtig finden Sie diesen Bestandteil?

|               |                          |                          |                          |                          |                          |                          |                          |                          |                          |         |
|---------------|--------------------------|--------------------------|--------------------------|--------------------------|--------------------------|--------------------------|--------------------------|--------------------------|--------------------------|---------|
| Überhaupt     | <input type="checkbox"/> | Äußerst |
| nicht wichtig | 1                        | 2                        | 3                        | 4                        | 5                        | 6                        | 7                        | 8                        | 9                        | wichtig |

Bewertung der Umsetzung durch alle Teilnehmenden im Mittel: **X**

Ihre persönliche Bewertung der Umsetzung: **X**

c) Wie gut ist dieser Bestandteil Ihrer Erfahrung nach derzeit in Deutschland umgesetzt?

|                 |                          |                          |                          |                          |                          |                          |                          |                          |                          |             |
|-----------------|--------------------------|--------------------------|--------------------------|--------------------------|--------------------------|--------------------------|--------------------------|--------------------------|--------------------------|-------------|
| Überhaupt       | <input type="checkbox"/> | Vollständig |
| nicht umgesetzt | 1                        | 2                        | 3                        | 4                        | 5                        | 6                        | 7                        | 8                        | 9                        | umgesetzt   |

## II. Rahmenbedingungen der Patientorientierung

### 5. Angemessene Kommunikation

Die Behandler/innen kommunizieren angemessen und unterstützend mit Ihnen. Beispiele dafür sind:

- Leicht verständliche Sprache
- Fragen stellen
- Aufmerksam zuhören
- Blickkontakt halten

Bewertung der Wichtigkeit durch alle Teilnehmenden im Mittel: **X**

Ihre persönliche Bewertung der Wichtigkeit: **X**

a) Wie wichtig finden Sie diesen Bestandteil?

|               |                          |                          |                          |                          |                          |                          |                          |                          |                          |         |
|---------------|--------------------------|--------------------------|--------------------------|--------------------------|--------------------------|--------------------------|--------------------------|--------------------------|--------------------------|---------|
| Überhaupt     | <input type="checkbox"/> | Äußerst |
| nicht wichtig | 1                        | 2                        | 3                        | 4                        | 5                        | 6                        | 7                        | 8                        | 9                        | wichtig |

Bewertung der Umsetzung durch alle Teilnehmenden im Mittel: **X**

Ihre persönliche Bewertung der Umsetzung: **X**

b) Wie gut ist dieser Bestandteil Ihrer Erfahrung nach derzeit in Deutschland umgesetzt?

|                 |                          |                          |                          |                          |                          |                          |                          |                          |                          |             |
|-----------------|--------------------------|--------------------------|--------------------------|--------------------------|--------------------------|--------------------------|--------------------------|--------------------------|--------------------------|-------------|
| Überhaupt       | <input type="checkbox"/> | Vollständig |
| nicht umgesetzt | 1                        | 2                        | 3                        | 4                        | 5                        | 6                        | 7                        | 8                        | 9                        | umgesetzt   |

### 6. Einbezug ergänzender Angebote

Ergänzende Angebote werden anerkannt und in die Behandlung einbezogen, falls Sie sich das wünschen.

Beispiele dafür sind:

- Selbsthilfegruppen
- Alternativmedizin / Komplementärmedizin (z.B. Homöopathie, Osteopathie, Akupunktur und Naturheilkunde)
- Spirituelle Unterstützung / Seelsorge

Bewertung der Wichtigkeit durch alle Teilnehmenden im Mittel: **X**

Ihre persönliche Bewertung der Wichtigkeit: **X**

a) Wie wichtig finden Sie diesen Bestandteil?

|               |                          |                          |                          |                          |                          |                          |                          |                          |                          |         |
|---------------|--------------------------|--------------------------|--------------------------|--------------------------|--------------------------|--------------------------|--------------------------|--------------------------|--------------------------|---------|
| Überhaupt     | <input type="checkbox"/> | Äußerst |
| nicht wichtig | 1                        | 2                        | 3                        | 4                        | 5                        | 6                        | 7                        | 8                        | 9                        | wichtig |

Bewertung der Umsetzung durch alle Teilnehmenden im Mittel: **X**

Ihre persönliche Bewertung der Umsetzung: **X**

b) Wie gut ist dieser Bestandteil Ihrer Erfahrung nach derzeit in Deutschland umgesetzt?

|                 |                          |                          |                          |                          |                          |                          |                          |                          |                          |             |
|-----------------|--------------------------|--------------------------|--------------------------|--------------------------|--------------------------|--------------------------|--------------------------|--------------------------|--------------------------|-------------|
| Überhaupt       | <input type="checkbox"/> | Vollständig |
| nicht umgesetzt | 1                        | 2                        | 3                        | 4                        | 5                        | 6                        | 7                        | 8                        | 9                        | umgesetzt   |

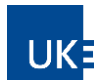

## 7. Zusammenarbeit von Behandlern

Innerhalb einer großen Praxis oder eines Krankenhauses hat die Zusammenarbeit einen hohen Stellenwert. Behandler/innen aus verschiedenen medizinischen Fachbereichen und Berufsgruppen arbeiten gut als Team zusammen. Die Zusammenarbeit ist geprägt von:

- Guten Absprachen
- Respekt
- Vertrauen
- Gemeinsamer Verantwortung

Die Leitungsebene fördert diese Teamarbeit.

Bewertung der Wichtigkeit durch alle Teilnehmenden im Mittel: **X**

Ihre persönliche Bewertung der Wichtigkeit: **X**

a) Wie wichtig finden Sie diesen Bestandteil?

|               |                          |                          |                          |                          |                          |                          |                          |                          |                          |         |
|---------------|--------------------------|--------------------------|--------------------------|--------------------------|--------------------------|--------------------------|--------------------------|--------------------------|--------------------------|---------|
| Überhaupt     | <input type="checkbox"/> | Äußerst |
| nicht wichtig | 1                        | 2                        | 3                        | 4                        | 5                        | 6                        | 7                        | 8                        | 9                        | wichtig |

Bewertung der Umsetzung durch alle Teilnehmenden im Mittel: **X**

Ihre persönliche Bewertung der Umsetzung: **X**

b) Wie gut ist dieser Bestandteil Ihrer Erfahrung nach derzeit in Deutschland umgesetzt?

|                 |                          |                          |                          |                          |                          |                          |                          |                          |                          |             |
|-----------------|--------------------------|--------------------------|--------------------------|--------------------------|--------------------------|--------------------------|--------------------------|--------------------------|--------------------------|-------------|
| Überhaupt       | <input type="checkbox"/> | Vollständig |
| nicht umgesetzt | 1                        | 2                        | 3                        | 4                        | 5                        | 6                        | 7                        | 8                        | 9                        | umgesetzt   |

## 8. Zugang zur Behandlung

Sie erreichen Behandler/innen leicht und ohne Hindernisse.

Beispiele hierfür sind:

- Krankenhäuser und Arztpraxen in der Nähe des Wohnortes (auch auf dem Land)
- Guter Zugang zur Behandlung auch bei möglichen Hindernissen (z.B. Behinderung oder mangelnden Deutschkenntnissen)
- Möglichst geringe Zuzahlungen bei Kassenleistungen **unter Berücksichtigung Ihrer finanziellen Möglichkeiten**
- **Gute Terminvergabe: Sie erhalten Termine rechtzeitig (auch Facharzttermine) und flexibel (z.B. auch telefonisch oder per Mail). Es wird ausreichend Zeit für den Termin eingeplant**
- **Bei einem Notfall erhalten Sie eine Behandlung auch außerhalb der üblichen Praxiszeiten (z.B. Bereitschaftsdienst oder Hausbesuche).**
- **Sie erhalten leicht Informationen darüber, welche Behandler/innen welche Behandlungen und Spezialisierungen anbieten.**

a) Finden Sie, dass die Beschreibung mit den Veränderungen besser oder schlechter ist?

|                      |                          |                          |                          |                          |                          |                          |                          |                          |                          |                          |                  |
|----------------------|--------------------------|--------------------------|--------------------------|--------------------------|--------------------------|--------------------------|--------------------------|--------------------------|--------------------------|--------------------------|------------------|
| Sehr viel schlechter | <input type="checkbox"/> | Sehr viel besser |
|                      | 1                        | 2                        | 3                        | 4                        | 5                        | 6                        | 7                        | 8                        | 9                        |                          |                  |

Bewertung der Wichtigkeit durch alle Teilnehmenden im Mittel: **X**

Ihre persönliche Bewertung der Wichtigkeit: **X**

b) Wie wichtig finden Sie diesen Bestandteil?

|                         |                          |                          |                          |                          |                          |                          |                          |                          |                          |                          |                 |
|-------------------------|--------------------------|--------------------------|--------------------------|--------------------------|--------------------------|--------------------------|--------------------------|--------------------------|--------------------------|--------------------------|-----------------|
| Überhaupt nicht wichtig | <input type="checkbox"/> | Äußerst wichtig |
|                         | 1                        | 2                        | 3                        | 4                        | 5                        | 6                        | 7                        | 8                        | 9                        |                          |                 |

Bewertung der Umsetzung durch alle Teilnehmenden im Mittel: **X**

Ihre persönliche Bewertung der Umsetzung: **X**

c) Wie gut ist dieser Bestandteil Ihrer Erfahrung nach derzeit in Deutschland umgesetzt?

|                           |                          |                          |                          |                          |                          |                          |                          |                          |                          |                          |                       |
|---------------------------|--------------------------|--------------------------|--------------------------|--------------------------|--------------------------|--------------------------|--------------------------|--------------------------|--------------------------|--------------------------|-----------------------|
| Überhaupt nicht umgesetzt | <input type="checkbox"/> | Vollständig umgesetzt |
|                           | 1                        | 2                        | 3                        | 4                        | 5                        | 6                        | 7                        | 8                        | 9                        |                          |                       |





## 9. Gute Planung der Behandlung

Es wird eine aufeinander abgestimmte und fortlaufende Behandlung sichergestellt.

Das bedeutet:

- Aufeinanderfolgende Behandlungen werden abgesprochen und geplant
- Termine zur Kontrolle und Nachsorge werden vereinbart
- Gute Absprachen beim Wechsel zwischen Krankenhäusern und Arztpraxen

Sie erhalten auf Wunsch Unterstützung durch einen festen Ansprechpartner im Gesundheitswesen, der Ihnen dabei hilft, die Behandlungen und Termine zu organisieren.

a) Finden Sie, dass die Beschreibung mit den Veränderungen besser oder schlechter ist?

|                      |                          |                          |                          |                          |                          |                          |                          |                          |                          |                  |
|----------------------|--------------------------|--------------------------|--------------------------|--------------------------|--------------------------|--------------------------|--------------------------|--------------------------|--------------------------|------------------|
| Sehr viel schlechter | <input type="checkbox"/> | Sehr viel besser |
|                      | 1                        | 2                        | 3                        | 4                        | 5                        | 6                        | 7                        | 8                        | 9                        |                  |

Bewertung der Wichtigkeit durch alle Teilnehmenden im Mittel: X

Ihre persönliche Bewertung der Wichtigkeit: X

b) Wie wichtig finden Sie diesen Bestandteil?

|                         |                          |                          |                          |                          |                          |                          |                          |                          |                          |                 |
|-------------------------|--------------------------|--------------------------|--------------------------|--------------------------|--------------------------|--------------------------|--------------------------|--------------------------|--------------------------|-----------------|
| Überhaupt nicht wichtig | <input type="checkbox"/> | Äußerst wichtig |
|                         | 1                        | 2                        | 3                        | 4                        | 5                        | 6                        | 7                        | 8                        | 9                        |                 |

Bewertung der Umsetzung durch alle Teilnehmenden im Mittel: X

Ihre persönliche Bewertung der Umsetzung: X

c) Wie gut ist dieser Bestandteil Ihrer Erfahrung nach derzeit in Deutschland umgesetzt?

|                           |                          |                          |                          |                          |                          |                          |                          |                          |                          |                       |
|---------------------------|--------------------------|--------------------------|--------------------------|--------------------------|--------------------------|--------------------------|--------------------------|--------------------------|--------------------------|-----------------------|
| Überhaupt nicht umgesetzt | <input type="checkbox"/> | Vollständig umgesetzt |
|                           | 1                        | 2                        | 3                        | 4                        | 5                        | 6                        | 7                        | 8                        | 9                        |                       |

## 10. Patientensicherheit

Die Behandlung wird so gestaltet, dass Ihr Risiko für negative Folgen und Fehler in der Behandlung möglichst gering ist.

Beispiele hierfür sind:

- Sauberkeit der Einrichtungen und der medizinischen Instrumente
- Aktuelle wissenschaftliche Ergebnisse werden bei der Behandlung berücksichtigt
- Wechselwirkungen zwischen verschiedenen Medikamenten werden beachtet
- Gründliche Aufzeichnung des Behandlungsverlaufs

a) Finden Sie, dass die Beschreibung mit den Veränderungen besser oder schlechter ist?

|                      |                          |                          |                          |                          |                          |                          |                          |                          |                          |                  |
|----------------------|--------------------------|--------------------------|--------------------------|--------------------------|--------------------------|--------------------------|--------------------------|--------------------------|--------------------------|------------------|
| Sehr viel schlechter | <input type="checkbox"/> | Sehr viel besser |
|                      | 1                        | 2                        | 3                        | 4                        | 5                        | 6                        | 7                        | 8                        | 9                        |                  |

Bewertung der Wichtigkeit durch alle Teilnehmenden im Mittel: **X**

Ihre persönliche Bewertung der Wichtigkeit: **X**

b) Wie wichtig finden Sie diesen Bestandteil?

|                         |                          |                          |                          |                          |                          |                          |                          |                          |                          |                 |
|-------------------------|--------------------------|--------------------------|--------------------------|--------------------------|--------------------------|--------------------------|--------------------------|--------------------------|--------------------------|-----------------|
| Überhaupt nicht wichtig | <input type="checkbox"/> | Äußerst wichtig |
|                         | 1                        | 2                        | 3                        | 4                        | 5                        | 6                        | 7                        | 8                        | 9                        |                 |

Bewertung der Umsetzung durch alle Teilnehmenden im Mittel: **X**

Ihre persönliche Bewertung der Umsetzung: **X**

c) Wie gut ist dieser Bestandteil Ihrer Erfahrung nach derzeit in Deutschland umgesetzt?

|                           |                          |                          |                          |                          |                          |                          |                          |                          |                          |                       |
|---------------------------|--------------------------|--------------------------|--------------------------|--------------------------|--------------------------|--------------------------|--------------------------|--------------------------|--------------------------|-----------------------|
| Überhaupt nicht umgesetzt | <input type="checkbox"/> | Vollständig umgesetzt |
|                           | 1                        | 2                        | 3                        | 4                        | 5                        | 6                        | 7                        | 8                        | 9                        |                       |

### III. Konkrete Handlungen und Maßnahmen

#### 11. Persönlich angepasste Informationen

Die Behandler/innen geben Ihnen Informationen über Ihre Vorsorge, Erkrankung und die Behandlungsmöglichkeiten **und deren mögliche Kosten in Form von Zuzahlungen**. Diese Informationen sind angepasst an Ihre persönlichen Wünsche und Bedürfnisse. Sie werden ermutigt, Ihr eigenes Wissen mit den Behandler/innen zu teilen. **Wenn Sie Medikamente verschrieben bekommen, erhalten Sie eine schriftliche Übersicht über die Einnahme und die möglichen Nebenwirkungen (Medikamentenplan).**

a) Finden Sie, dass die Beschreibung mit den Veränderungen besser oder schlechter ist?

|                      |                          |                          |                          |                          |                          |                          |                          |                          |                          |                  |
|----------------------|--------------------------|--------------------------|--------------------------|--------------------------|--------------------------|--------------------------|--------------------------|--------------------------|--------------------------|------------------|
| Sehr viel schlechter | <input type="checkbox"/> | Sehr viel besser |
|                      | 1                        | 2                        | 3                        | 4                        | 5                        | 6                        | 7                        | 8                        | 9                        |                  |

Bewertung der Wichtigkeit durch alle Teilnehmenden im Mittel: **X**

Ihre persönliche Bewertung der Wichtigkeit: **X**

b) Wie wichtig finden Sie diesen Bestandteil?

|                         |                          |                          |                          |                          |                          |                          |                          |                          |                          |                 |
|-------------------------|--------------------------|--------------------------|--------------------------|--------------------------|--------------------------|--------------------------|--------------------------|--------------------------|--------------------------|-----------------|
| Überhaupt nicht wichtig | <input type="checkbox"/> | Äußerst wichtig |
|                         | 1                        | 2                        | 3                        | 4                        | 5                        | 6                        | 7                        | 8                        | 9                        |                 |

Bewertung der Umsetzung durch alle Teilnehmenden im Mittel: **X**

Ihre persönliche Bewertung der Umsetzung: **X**

c) Wie gut ist dieser Bestandteil Ihrer Erfahrung nach derzeit in Deutschland umgesetzt?

|                           |                          |                          |                          |                          |                          |                          |                          |                          |                          |                       |
|---------------------------|--------------------------|--------------------------|--------------------------|--------------------------|--------------------------|--------------------------|--------------------------|--------------------------|--------------------------|-----------------------|
| Überhaupt nicht umgesetzt | <input type="checkbox"/> | Vollständig umgesetzt |
|                           | 1                        | 2                        | 3                        | 4                        | 5                        | 6                        | 7                        | 8                        | 9                        |                       |

#### 12. Gleichberechtigte Zusammenarbeit und Beteiligung bei Entscheidungen

Es wird eine gleichberechtigte Zusammenarbeit zwischen Ihnen und den Behandler/innen angestrebt. Entscheidungen zur Behandlung werden gemeinsam getroffen, falls Sie sich das wünschen. Dabei bringen Sie aktiv Ihre eigene Sicht, Wünsche und Ziele mit ein.

Bewertung der Wichtigkeit durch alle Teilnehmenden im Mittel: **X**

Ihre persönliche Bewertung der Wichtigkeit: **X**

a) Wie wichtig finden Sie diesen Bestandteil?

|                         |                          |                          |                          |                          |                          |                          |                          |                          |                          |                 |
|-------------------------|--------------------------|--------------------------|--------------------------|--------------------------|--------------------------|--------------------------|--------------------------|--------------------------|--------------------------|-----------------|
| Überhaupt nicht wichtig | <input type="checkbox"/> | Äußerst wichtig |
|                         | 1                        | 2                        | 3                        | 4                        | 5                        | 6                        | 7                        | 8                        | 9                        |                 |

Bewertung der Umsetzung durch alle Teilnehmenden im Mittel: **X**

Ihre persönliche Bewertung der Umsetzung: **X**

b) Wie gut ist dieser Bestandteil Ihrer Erfahrung nach derzeit in Deutschland umgesetzt?

|                           |                          |                          |                          |                          |                          |                          |                          |                          |                          |                       |
|---------------------------|--------------------------|--------------------------|--------------------------|--------------------------|--------------------------|--------------------------|--------------------------|--------------------------|--------------------------|-----------------------|
| Überhaupt nicht umgesetzt | <input type="checkbox"/> | Vollständig umgesetzt |
|                           | 1                        | 2                        | 3                        | 4                        | 5                        | 6                        | 7                        | 8                        | 9                        |                       |

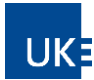

### 13. Beteiligung von Familie und Freunden

Ihre Familienmitglieder und Freunde werden in dem Maß in die Behandlung einbezogen, wie Sie es sich wünschen.

Beispiele dafür sind:

- Familie und Freunde bekommen Informationen
- Familie und Freunde nehmen an Gesprächen teil
- Familie und Freunde unterstützen aktiv die Behandlung im Alltag (z.B. beim Einnehmen von Medikamenten oder Hinbringen zur Behandlung)

Bewertung der Wichtigkeit durch alle Teilnehmenden im Mittel: X

Ihre persönliche Bewertung der Wichtigkeit: X

a) Wie wichtig finden Sie diesen Bestandteil?

|               |                          |                          |                          |                          |                          |                          |                          |                          |                          |         |
|---------------|--------------------------|--------------------------|--------------------------|--------------------------|--------------------------|--------------------------|--------------------------|--------------------------|--------------------------|---------|
| Überhaupt     | <input type="checkbox"/> | Äußerst |
| nicht wichtig | 1                        | 2                        | 3                        | 4                        | 5                        | 6                        | 7                        | 8                        | 9                        | wichtig |

Bewertung der Umsetzung durch alle Teilnehmenden im Mittel: X

Ihre persönliche Bewertung der Umsetzung: X

b) Wie gut ist dieser Bestandteil Ihrer Erfahrung nach derzeit in Deutschland umgesetzt?

|                 |                          |                          |                          |                          |                          |                          |                          |                          |                          |             |
|-----------------|--------------------------|--------------------------|--------------------------|--------------------------|--------------------------|--------------------------|--------------------------|--------------------------|--------------------------|-------------|
| Überhaupt       | <input type="checkbox"/> | Vollständig |
| nicht umgesetzt | 1                        | 2                        | 3                        | 4                        | 5                        | 6                        | 7                        | 8                        | 9                        | umgesetzt   |

### 14. Aktivierung der Patientinnen und Patienten

Die Behandler/innen bestärken Sie darin, aktiv und selbstständig mit Ihrer Erkrankung und der Behandlung umzugehen. Dadurch werden Sie zu Experten Ihrer eigenen Erkrankung.

Beispiele dafür sind:

- Im Alltag gut mit den Anforderungen der Erkrankung umgehen
- Aktiv am Gespräch mit Behandler/innen teilnehmen
- Zurechtfinden im Gesundheitswesen
- Möglichkeiten zur Verbesserung der eigenen Situation suchen (z.B. mehr Sport treiben oder ein neues Hobby für sich finden)

a) Finden Sie, dass die Beschreibung mit den Veränderungen besser oder schlechter ist?

|            |                          |                          |                          |                          |                          |                          |                          |                          |                          |           |
|------------|--------------------------|--------------------------|--------------------------|--------------------------|--------------------------|--------------------------|--------------------------|--------------------------|--------------------------|-----------|
| Sehr viel  | <input type="checkbox"/> | Sehr viel |
| schlechter | 1                        | 2                        | 3                        | 4                        | 5                        | 6                        | 7                        | 8                        | 9                        | besser    |

Bewertung der Wichtigkeit durch alle Teilnehmenden im Mittel: X

Ihre persönliche Bewertung der Wichtigkeit: X

b) Wie wichtig finden Sie diesen Bestandteil?

|               |                          |                          |                          |                          |                          |                          |                          |                          |                          |         |
|---------------|--------------------------|--------------------------|--------------------------|--------------------------|--------------------------|--------------------------|--------------------------|--------------------------|--------------------------|---------|
| Überhaupt     | <input type="checkbox"/> | Äußerst |
| nicht wichtig | 1                        | 2                        | 3                        | 4                        | 5                        | 6                        | 7                        | 8                        | 9                        | wichtig |

Bewertung der Umsetzung durch alle Teilnehmenden im Mittel: X

Ihre persönliche Bewertung der Umsetzung: X

c) Wie gut ist dieser Bestandteil Ihrer Erfahrung nach derzeit in Deutschland umgesetzt?

|                 |                          |                          |                          |                          |                          |                          |                          |                          |                          |             |
|-----------------|--------------------------|--------------------------|--------------------------|--------------------------|--------------------------|--------------------------|--------------------------|--------------------------|--------------------------|-------------|
| Überhaupt       | <input type="checkbox"/> | Vollständig |
| nicht umgesetzt | 1                        | 2                        | 3                        | 4                        | 5                        | 6                        | 7                        | 8                        | 9                        | umgesetzt   |

## 15. Unterstützung des körperlichen Wohlbefindens

Die Behandler/innen kümmern sich um Ihr körperliches Wohlbefinden.

Beispiele dafür sind:

- Behandlung von Schmerzen
- Gesunde Ernährung
- Unterstützung im Alltag (z.B. durch die Verordnung von Gehhilfen **und durch Übungen, diese im Alltag richtig zu benutzen**)

a) Finden Sie, dass die Beschreibung mit den Veränderungen besser oder schlechter ist?

|                      |                          |                          |                          |                          |                          |                          |                          |                          |                          |                  |
|----------------------|--------------------------|--------------------------|--------------------------|--------------------------|--------------------------|--------------------------|--------------------------|--------------------------|--------------------------|------------------|
| Sehr viel schlechter | <input type="checkbox"/> | Sehr viel besser |
|                      | 1                        | 2                        | 3                        | 4                        | 5                        | 6                        | 7                        | 8                        | 9                        |                  |

Bewertung der Wichtigkeit durch alle Teilnehmenden im Mittel: **X**

Ihre persönliche Bewertung der Wichtigkeit: **X**

b) Wie wichtig finden Sie diesen Bestandteil?

|                         |                          |                          |                          |                          |                          |                          |                          |                          |                          |                 |
|-------------------------|--------------------------|--------------------------|--------------------------|--------------------------|--------------------------|--------------------------|--------------------------|--------------------------|--------------------------|-----------------|
| Überhaupt nicht wichtig | <input type="checkbox"/> | Äußerst wichtig |
|                         | 1                        | 2                        | 3                        | 4                        | 5                        | 6                        | 7                        | 8                        | 9                        |                 |

Bewertung der Umsetzung durch alle Teilnehmenden im Mittel: **X**

Ihre persönliche Bewertung der Umsetzung: **X**

c) Wie gut ist dieser Bestandteil Ihrer Erfahrung nach derzeit in Deutschland umgesetzt?

|                           |                          |                          |                          |                          |                          |                          |                          |                          |                          |                       |
|---------------------------|--------------------------|--------------------------|--------------------------|--------------------------|--------------------------|--------------------------|--------------------------|--------------------------|--------------------------|-----------------------|
| Überhaupt nicht umgesetzt | <input type="checkbox"/> | Vollständig umgesetzt |
|                           | 1                        | 2                        | 3                        | 4                        | 5                        | 6                        | 7                        | 8                        | 9                        |                       |

## 16. Unterstützung des psychischen Wohlbefindens

Die Behandler/innen gehen auf Ihre Gefühlslage und Ihr psychisches Befinden ein.

Beispiele dafür sind:

- Ansprechen von Sorgen und Ängsten
- Angebot psychologischer Unterstützung

Bewertung der Wichtigkeit durch alle Teilnehmenden im Mittel: **X**

Ihre persönliche Bewertung der Wichtigkeit: **X**

a) Wie wichtig finden Sie diesen Bestandteil?

|                         |                          |                          |                          |                          |                          |                          |                          |                          |                          |                 |
|-------------------------|--------------------------|--------------------------|--------------------------|--------------------------|--------------------------|--------------------------|--------------------------|--------------------------|--------------------------|-----------------|
| Überhaupt nicht wichtig | <input type="checkbox"/> | Äußerst wichtig |
|                         | 1                        | 2                        | 3                        | 4                        | 5                        | 6                        | 7                        | 8                        | 9                        |                 |

Bewertung der Umsetzung durch alle Teilnehmenden im Mittel: **X**

Ihre persönliche Bewertung der Umsetzung: **X**

b) Wie gut ist dieser Bestandteil Ihrer Erfahrung nach derzeit in Deutschland umgesetzt?

|                           |                          |                          |                          |                          |                          |                          |                          |                          |                          |                       |
|---------------------------|--------------------------|--------------------------|--------------------------|--------------------------|--------------------------|--------------------------|--------------------------|--------------------------|--------------------------|-----------------------|
| Überhaupt nicht umgesetzt | <input type="checkbox"/> | Vollständig umgesetzt |
|                           | 1                        | 2                        | 3                        | 4                        | 5                        | 6                        | 7                        | 8                        | 9                        |                       |

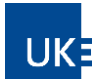

Sie haben nun unsere Beschreibung zur Patientenorientierung gelesen und bewertet.

Wenn Sie finden, dass Bestandteile in unserer Beschreibung immer noch fehlen, können Sie diese hier benennen:

---

---

---

---

---

---

---

---

---

---

Haben Sie noch weitere Anmerkungen zu der Beschreibung (z.B. Verständlichkeit)?

---

---

---

---

---

---

---

---

Vielen Dank für das Ausfüllen des Fragebogens. Sie haben uns damit sehr geholfen und einen Beitrag für die Verbesserung der Versorgung geleistet!

# BMJ Open

## Assessing the relevance and implementation of patient-centeredness from the patients' perspective in Germany: Results of a Delphi study

|                                 |                                                                                                                                                                                                                                                                                                                                                                                                                                           |
|---------------------------------|-------------------------------------------------------------------------------------------------------------------------------------------------------------------------------------------------------------------------------------------------------------------------------------------------------------------------------------------------------------------------------------------------------------------------------------------|
| Journal:                        | <i>BMJ Open</i>                                                                                                                                                                                                                                                                                                                                                                                                                           |
| Manuscript ID                   | bmjopen-2019-031741.R1                                                                                                                                                                                                                                                                                                                                                                                                                    |
| Article Type:                   | Original research                                                                                                                                                                                                                                                                                                                                                                                                                         |
| Date Submitted by the Author:   | 25-Sep-2019                                                                                                                                                                                                                                                                                                                                                                                                                               |
| Complete List of Authors:       | Zeh, Stefan; Universitätsklinikum Hamburg-Eppendorf, Department of Psychosocial Medicine<br>Christalle, Eva; Universitätsklinikum Hamburg Eppendorf Zentrum für Psychosoziale Medizin, Department of Medical Psychology;<br>Hahlweg, Pola; Universitätsklinikum Hamburg-Eppendorf, Department of Medical Psychology<br>Härter, Martin; Universitätsklinikum Hamburg-Eppendorf<br>Scholl, Isabelle; Universitätsklinikum Hamburg-Eppendorf |
| <b>Primary Subject Heading</b>: | Health services research                                                                                                                                                                                                                                                                                                                                                                                                                  |
| Secondary Subject Heading:      | Health policy                                                                                                                                                                                                                                                                                                                                                                                                                             |
| Keywords:                       | patient-centeredness, chronic diseases, health care delivery, Delphi study, patient perspective                                                                                                                                                                                                                                                                                                                                           |
|                                 |                                                                                                                                                                                                                                                                                                                                                                                                                                           |

SCHOLARONE™  
Manuscripts

1  
2  
3 **Assessing the relevance and implementation of patient-centeredness from the patients'**  
4 **perspective in Germany: Results of a Delphi study**  
5  
6  
7

8 Stefan Zeh<sup>1</sup>, Eva Christalle<sup>1</sup>, Pola Hahlweg<sup>1</sup>, Martin Härter<sup>1</sup>, Isabelle Scholl<sup>1</sup>  
9

10  
11 <sup>1</sup>Department of Medical Psychology, University Medical Center Hamburg-Eppendorf,  
12 Martinistraße 52, D-20246 Hamburg, Germany  
13  
14

15  
16 Email addresses:  
17

18 Stefan Zeh, M.Sc.: [s.zeh@uke.de](mailto:s.zeh@uke.de)  
19  
20 Eva Christalle, M.Sc.: [e.christalle@uke.de](mailto:e.christalle@uke.de)  
21  
22 Pola Hahlweg, Dipl.-Psych.: [p.hahlweg@uke.de](mailto:p.hahlweg@uke.de)  
23  
24 Prof. Dr. Dr. Martin Härter, Dipl.-Psych.: [m.haerter@uke.de](mailto:m.haerter@uke.de)  
25  
26 Dr. Isabelle Scholl, Dipl.-Psych.: [i.scholl@uke.de](mailto:i.scholl@uke.de)  
27  
28  
29

30 Corresponding author:  
31

32 Stefan Zeh, M.Sc.  
33 University Medical Center Hamburg-Eppendorf  
34 Department of Medical Psychology  
35 Martinistr. 52  
36  
37 20246 Hamburg, Germany  
38  
39 Email: [s.zeh@uke.de](mailto:s.zeh@uke.de)  
40  
41 Phone: +49-(0)40-7410-52001  
42  
43  
44  
45  
46

47 Word count for the abstract: 278 (max. 300)

48 Word count for the manuscript: 3858 (max. 4000)

49 Count for figures/tables: 5 (2 figures, 3 tables) (max. 5)

50 Count of online supplements: 1 table

51  
52 Count for references: 32  
53  
54  
55  
56  
57  
58  
59  
60



## 1 **ABSTRACT**

### 2 **Objective**

3 Patient-centeredness (PC) has particularly grown in relevance in health services research as well as in  
4 politics and there has been much research on its conceptualization. However, conceptual work  
5 neglected the patients' perspective. Thus, it remains unclear which dimensions of PC matter most to  
6 patients. This study aims to assess relevance and current degree of implementation of PC from the  
7 perspective of chronically ill patients in Germany.

### 8 **Methods**

9 We conducted a Delphi study. Patients were recruited throughout Germany using community-based  
10 strategies (e.g. newspapers and support groups). In round one, patients rated relevance and  
11 implementation of 15 dimensions of PC anonymously. In round two, patients received results of  
12 round one and were asked to re-rate their own results. Participants had to have at least one of the  
13 following chronic diseases: cancer, cardiovascular disease, mental disorder, or musculoskeletal  
14 disorder. Furthermore, patients had to be at least 18 years old and had to give informed consent  
15 prior to participation.

### 16 **Results**

17 226 patients participated in round one, 214 patients in round two. In both rounds, all 15 dimensions  
18 were rated highly relevant, but currently insufficiently implemented. Most relevant dimensions  
19 included "patient safety", "access to care" and "patient information". Due to small sizes of sub-  
20 samples between chronic disease groups, differences could not be computed. For the other  
21 subgroups (e.g. single disease vs. multi-morbidity), there were no major differences.

### 22 **Conclusion**

23 This is one of the first studies assessing patient-centeredness from patients' perspective in Germany.  
24 We showed that patients consider every dimension of PC relevant, but currently not well  
25 implemented. Our results can be used to foster patient-centered health care delivery and to develop  
26 patient-reported experience measures to assess patient-centeredness of health care in Germany.

27  
28 **Keywords:** patient-centeredness; chronic diseases; health care delivery; Delphi study; patient perspective

### 29 30 **Strengths and limitations of this study:**

- 31 - No rating of dimensions of patient-centeredness (PC) from the patients' perspective available yet
- 32 - Extensive inclusion of patients' perspectives within the Delphi study
- 33 - No restriction to a specific regional area through nation-wide community-based strategies
- 34 - Possibility for participants to give written feedback in order to enhance quality of given answers
- 35 - Limitation to only four chronic disease groups

## 36 INTRODUCTION

37  
38 Over the last years, the concept of patient-centeredness (PC) has been widely discussed. More and  
39 more, the terms person-centeredness [1,2] and people-centeredness [3] also appear in the literature,  
40 either being used synonymously to patient-centeredness or converging around central ideas. Its  
41 relevance in politics, research and health care practice has been growing constantly [4–6]. In  
42 Germany, the Law on Patients' Rights [5] mandates certain aspects of patient-centered care, like the  
43 right for comprehensible and comprehensive patient information. However, there is no national  
44 recommendation for the implementation of patient-centered care in Germany yet. Many studies  
45 showed a positive association of PC with relevant outcomes like patient satisfaction, well-being and  
46 adherence [7], which are especially relevant in chronic disease management. Nevertheless, there has  
47 been a lack of conceptual clarity regarding the use of the term of PC [8–13]. Scholl and colleagues  
48 [12] closed this gap by developing an integrative generic model derived from literature extracting 15  
49 dimensions of PC (see figure 1). This model was validated by assessing the views of different health  
50 care stakeholders on its relevance and clarity [14]. Although some representatives of patient  
51 organizations participated in this assessment, the perspective of the recipients of patient-centered  
52 care, the patients themselves, was underrepresented. In summary, without the patients' perspective,  
53 the conceptualization of PC is still missing its most crucial aspect: the assessment and evaluation of  
54 PC in health care from the view of patients [15–17].

56 [Insert Figure 1 here]

57 **Figure 1 Integrative model of patient-centeredness (Scholl et al., 2014)**

58  
59 There are only few international studies investigating the patients' assessment of PC [18,19], without  
60 any published studies from Germany. Thus, we don't know what patients consider relevant about PC,  
61 nor how patients view the current degree of implementation of PC in the German health care  
62 system. It is a system in which, health care coverage is universal, mandatory and offers extensive  
63 services. Government delegates decision-making powers to self-regulated organizations of payers  
64 and providers. While outpatient care is mainly delivered in one- or two-physician practices on a fee-  
65 for-service payment model, hospitals mainly deliver inpatient care on case-based payment model  
66 [20,21]. Yet, in order to foster PC in Germany, it is crucial to know what aspects of PC are relevant to  
67 patients and how well these aspects are already implemented, as it allows prioritizing aspects  
68 especially relevant or not yet implemented.  
69 Therefore, this study aims to close this gap by assessing relevance and current degree of  
70 implementation of different dimensions of PC from the patients' perspective in Germany. Assessing

1  
2  
3 71 relevance and current degree of implementation of different aspects of PC can therefore be seen as  
4  
5 72 the first steps in achieving a more patient-centered health care.

6  
7 73 This Delphi study was conducted as part of the study “Assessment of patient-centeredness through  
8  
9 74 patient-reported experience measures (ASPIRED)” [22]. Within the study ASPIRED, a patient-reported  
10  
11 75 experience measure will be developed to foster patient-centered care.  
12  
13 76

## 13 77 **METHODS**

### 14 15 78 **Study design**

16  
17 79 We used a Delphi study, comparable to the expert validation study mentioned before [14]. A Delphi  
18  
19 80 study consists of several rounds. In each round after the first, participants get their own ratings as  
20  
21 81 well as the median ratings of all participants in the previous round. This procedure generates the  
22  
23 82 possibility for participants to share their opinion from different regional locations without the threat  
24  
25 83 of some participants dominating the discussion [23]. It aims to reach high group consensus through a  
26  
27 84 structured and anonymous group discussion [24]. Like Zill and colleagues [14] or van Rijssen and  
28  
29 85 colleagues [25], we planned to perform two rounds prior to conducting the first round. However, if  
30  
31 86 we had seen major discrepancies after two rounds, we would have performed another round, if  
32  
33 87 necessary.  
34  
35 88

### 33 89 **Preparation of the Delphi study – adaptation of the model of patient-centeredness using** 34 35 90 **cognitive interviews**

36  
37 91 We based our Delphi study on the integrative model of PC [12,14]. In a first step, the scientific model  
38  
39 92 was adapted into a version comprehensible to patients (first version). Adaptation was done by group  
40  
41 93 discussions in our research team (SZ, EC, PH, IS) in nine iterations. To make sentences easy to  
42  
43 94 understand, we used dictionaries and recommendations on adaptation of wording and grammar  
44  
45 95 [26]. We then tested comprehensibility of the new version through cognitive interviews with  
46  
47 96 patients. We recruited ten patients through several community-based strategies (see below) in order  
48  
49 97 to get a heterogeneous sample regarding demographic variables (e.g. age, first language, educational  
50  
51 98 level). Participants had to have at least one of the following chronic diseases: cancer, cardiovascular  
52  
53 99 disease, mental disorder, or musculoskeletal disorder. In cognitive interviews, we handed out the  
54  
55 100 first adapted version described above. Participants were asked to read each dimension step by step  
56  
57 101 and explain in their own words how they understood the description. All interviews were audio-  
58  
59 102 recorded, transcribed, and analyzed independently by two researchers (SZ, EC). According to the  
60  
103 results, the model was revised (second version) in subsequent group discussions (SZ, EC, IS, PH).  
104  
105

### 106 **Delphi study**

107 Participants received the adapted integrative model of PC (second version) and were asked to rate  
108 relevance and current implementation from their perspective. For both aspects, a nine-point Likert  
109 scale (1 = *not relevant/not well implemented*; 9 = *very relevant/well implemented*) was given. In  
110 addition, we asked an open-ended question about whether any relevant aspects were missing in the  
111 model and whether they had any further comments (e.g. regarding comprehensibility of  
112 descriptions). Based on answers to those open-ended questions, we adapted the model again (third  
113 version). In the second round of the Delphi study, patients received their own ratings from the first  
114 round again. Furthermore, we gave them the median rating of other participants in comparison.  
115 Following, we then asked participants to repeat their rating. For all dimensions with adapted  
116 descriptions, participants were also asked to rate whether the description worsened or improved  
117 with the adaptation (from 1 = *much worse* to 9 = *much better*).  
118 For both rounds, participants could choose whether they wanted to participate online or via mail.  
119 Both versions were identical in terms of response format (see Appendix A1 for the mail-based  
120 version with adaptations (highlighted) made after round 1). For the online version, we used  
121 LimeSurvey [27]. The study was conducted from June 2018 to August 2018. For each round,  
122 participants had three weeks to reply and there were four weeks between the two rounds. After  
123 completion of both rounds, participants received a compensation of 25€. Conducting the Delphi  
124 study as well as reporting of methods and results were based on the recommendations of Hasson  
125 and colleagues [24] as well as of Jünger and colleagues [28].

### 126 **Study population and recruitment**

127 We aimed to include 200 patients in the study. We expected a drop-out rate of 15% between round  
128 1 and 2. Thus, we aimed to include 240 in the first round. We recruited patients through different  
129 community-based strategies: a) Notices in local stores in Hamburg, b) dissemination through national  
130 and regional patient organizations and networks, c) Facebook groups of different towns, and d) two  
131 national newspapers (ZEIT and Bild). Participants could reach out to SZ and EC with the contact  
132 information provided on the notices and in emails. Since no member of the research team had direct  
133 contact with participants, the possibility of having influenced the participants' judgements was  
134 reduced. Participants were included if they gave their informed consent by signing the informed  
135 consent letter (mail version) or by choosing „yes“ in a dropdown menu after a question whether they  
136 consent (online version) , were 18 years or older and if they reported at least one disease from one  
137 of the aforementioned chronic disease groups. In Figure 2, an overview illustrates the procedure.

138  
139 [Please insert Figure 2 around here]  
140

## 141 **Patient and Public Involvement**

142 Patients were not involved in the development of the research questions. However, during the  
143 development of the research proposal and prior to submission to the funding agency, we obtained  
144 collaboration agreements with several federal and regional patient organizations in order to secure  
145 field access and feasibility. Patient organizations were approached for that purpose. All gave us  
146 positive feedback on the study aims, acknowledging that more research is needed on patients'  
147 experiences related to patient-centered care. Thus, patient organizations supported recruitment of  
148 study participants by disseminating advertisement for study participation. No individual patient was  
149 involved in recruitment and conduct of the study. All study participants and every interested person  
150 in the public have the possibility to read and download regular project updates and study results on  
151 the project website (<http://www.ham-net.de/de/projekte/projekt-aspired.html>).

## 153 **Data analyses**

154 For the ratings, median, mean and standard deviation were calculated for all participants using SPSS  
155 (Version 21) [29]. Demographic data were analyzed accordingly, except for nominal items where we  
156 calculated frequencies. Consensus was examined by calculating distributions of answers per tertile  
157 (1-3; 4-6; 7-9) in comparison to Zill et al. [14]. We compared different subgroups due to potential  
158 differences in using the health care system including age groups (18-30 (young); 31-65 (middle aged);  
159 over 65 (older)), way of participation (mail vs. online) and morbidity (single disease vs. multi-  
160 morbidity). Open answers were analyzed, summarized by two researchers and the student assistant  
161 (SZ, EC, TK), and reviewed in a group discussion (SZ, EC, IS).

## 163 **RESULTS**

### 164 **Adaptation of the integrative model into a comprehensible version**

165 Within cognitive interviews, each participant understood generally well the patient version of  
166 patient-centeredness (first version). Some participants wanted easier terms (e.g. treatment  
167 ("Behandlung") instead of health care ("Gesundheitsversorgung")). We tested two versions: version  
168 A wasn't directed towards patients ("*Patients* can contact *their* health care provider easily"), version  
169 B was directed towards patients ("*You* can contact *your* health care provider easily"). Nine out of ten  
170 participants preferred personal pronouns (version B); thus, we adapted accordingly.

## 172 **Delphi study**

### 173 **Characteristics of patients from the Delphi study**

174 262 patients, who reacted to the community-based recruitment strategies, fulfilled the inclusion  
175 criteria and were invited to participate via letter or online in the first round of the Delphi study after

176 having expressed interest in study participation. In the first round, 226 patients participated  
 177 (response rate = 86.26%), and in the second round, 214 patients participated (final response rate =  
 178 81.7%). Thus, the final sample consisted of 214 patients (drop-out rates: from invitation to first  
 179 round: n = 36 (13.7%); from invitation to second round: n = 48 (18.3%); from first to second round: n  
 180 = 12 (5.3%)). Mean age was 52 years (normally distributed), and two thirds were female. Further  
 181 information on participants' demographic and clinical characteristics is displayed in Table 1 and in  
 182 Table S1 (online supplement).

183 **Table 1**

184 Demographic and clinical characteristics of participants of the first round (N = 226)

| Characteristic                                       | Frequency              |
|------------------------------------------------------|------------------------|
| Age (in years)                                       | M = 51.79 (SD = 16.46) |
| Sex                                                  |                        |
| <i>Female</i>                                        | 149 (65.9 %)           |
| <i>Male</i>                                          | 76 (33.6 %)            |
| First language                                       |                        |
| <i>German</i>                                        | 219 (96.9 %)           |
| <i>Other</i>                                         | 5 (2.2 %)              |
| Chronic disease group<br>(multiple answers possible) |                        |
| <i>Cancer</i>                                        | 36 (15.3 %)            |
| <i>Cardiovascular disease</i>                        | 90 (39.8 %)            |
| <i>Mental disorder</i>                               | 117 (51.8 %)           |
| <i>Musculoskeletal disorder</i>                      | 114 (50.4 %)           |
| <i>Others<sup>a</sup></i>                            | 149 (67.4 %)           |
| Residence                                            |                        |
| <i>Hamburg</i>                                       | 59 (26.1 %)            |
| <i>Baden-Wuerttemberg</i>                            | 13 (5.8%)              |
| <i>North-Rhine Westphalia</i>                        | 23 (10.2%)             |
| <i>Rhineland-Palatinate</i>                          | 3 (1.3%)               |
| <i>Saarland</i>                                      | 3 (1.3%)               |
| <i>Saxony</i>                                        | 13 (5.8%)              |
| <i>Saxony-Anhalt</i>                                 | 4 (1.8%)               |
| <i>Schleswig-Holstein</i>                            | 10 (4.4%)              |
| <i>Thuringia</i>                                     | 1 (0.4%)               |

|                                      |                      |
|--------------------------------------|----------------------|
| <b>Bavaria</b>                       | 22 (9.7%)            |
| <b>Berlin</b>                        | 14 (6.2%)            |
| <b>Brandenburg</b>                   | 11 (4.9%)            |
| <b>Bremen</b>                        | 4 (1.8%)             |
| <b>Hesse</b>                         | 14 (6.2%)            |
| <b>Mecklenburg-Western Pomerania</b> | 19 (8.4%)            |
| <b>Lower Saxony</b>                  | 13 (5.8%)            |
| Health status <sup>b</sup>           | M = 2.49 (SD = 0.77) |

Note: M = Mean. SD = Standard Deviation.

*a* = Additional to one of the four groups mentioned above. Other chronic diseases included for example diabetes (*n* = 12), sleep apnea (*n* = 5) and hypothyroidism (*n* = 4). Please see the online supplement S1 for a comprehensive overview of other diseases.

*b* = Health status was assessed with the item "How would you assess your health status in general?" ranging from 1 = excellent to 5 = bad.

### Results of round 1

In Table 2, results from the first round of the ratings of relevance and degree of current implementation are shown. Regarding ratings of relevance, 13 out of 15 dimensions showed the maximum median of 9. The dimensions "patient as a unique person", "clinician-patient relationship", "clinician-patient communication", "access to care" and "physical support" showed highest means (range from 8.46 to 8.31). Consensus was defined as the degree to which patients rated dimensions in agreement and was predefined as reached if it was higher than 50%. That means that consensus was reached when at least 50% of the patients rated dimensions to be very or not very relevant (tertile from 7 to 9 or 1 to 3, respectively). Every dimension showed consensus of > 50% for tertile seven to nine (i.e. majority of patients rated within the highest tertile). Regarding the current degree of implementation, 3 out of 15 dimensions showed a median of 6 ("clinician-patient relationship", "clinician-patient communication", and "physical support"). All other dimensions showed a median of 5. The dimensions with the highest means were the same as those with the highest medians. Regarding consensus, every dimension had a rating of > 50% for the tertile from four to six. In general, every dimension of round 1 was rated as very relevant and as insufficiently implemented. Furthermore, patients were united in their rating because of the high consensus.

**Table 2**

Results for the assessment of relevance and implementation from the first round

|                                                                     | Relevance |             | Implementation |             |
|---------------------------------------------------------------------|-----------|-------------|----------------|-------------|
|                                                                     | Median    | M (SD)      | Median         | M (SD)      |
| <b>1. Patient-centered characteristics of health care providers</b> | 9         | 8.46 (0.90) | 5              | 5.30 (1.44) |
| <b>2. Trustful relationship</b>                                     | 9         | 8.41 (0.94) | 6              | 5.61 (1.72) |
| <b>3. Uniqueness of each patient</b>                                | 9         | 8.31 (1.11) | 5              | 5.21 (1.74) |
| <b>4. Consideration of personal circumstances</b>                   | 9         | 8.15 (1.23) | 5              | 4.77 (1.86) |



|                                                                        |   |             |   |             |
|------------------------------------------------------------------------|---|-------------|---|-------------|
| 5. Appropriate communication                                           | 9 | 8.31 (0.97) | 6 | 5.56 (1.74) |
| 6. Integration of additional health care elements                      | 8 | 7.34 (1.81) | 5 | 4.56 (1.99) |
| 7. Teamwork of health care providers                                   | 9 | 8.29 (1.18) | 5 | 5.08 (1.90) |
| 8. Access to care                                                      | 9 | 8.31 (0.99) | 5 | 4.88 (2.08) |
| 9. Good planning of care                                               | 9 | 8.30 (1.04) | 5 | 5.25 (1.92) |
| 10. Personally tailored information                                    | 9 | 8.27 (1.12) | 5 | 5.10 (1.87) |
| 11. Collaboration as equal partners and involvement in decision making | 9 | 8.25 (1.11) | 5 | 5.15 (2.04) |
| 12. Involvement of family and friends                                  | 7 | 6.92 (2.16) | 5 | 4.91 (2.21) |
| 13. Empowerment of patients                                            | 9 | 8.20 (1.13) | 5 | 5.23 (1.97) |
| 14. Support of physical wellbeing                                      | 9 | 8.31 (0.98) | 6 | 5.58 (1.95) |
| 15. Support of mental wellbeing                                        | 9 | 8.12 (1.35) | 5 | 4.83 (1.98) |

209  
210 Sixty participants responded to the open-ended questions. Comments referred to additional aspects,  
211 including time issues within health care (e.g. “Neither nurses, nor doctors have enough time for the  
212 patients”), financial aspects (“without additional costs for people living in poverty”) and medication  
213 plans (“discussing medication plans is too fast” or “more information about side effects”). We revised  
214 descriptions after the first round according to the most frequent comments (third version). German  
215 descriptions of dimensions used in round 2, in which changes from the second to third version are  
216 highlighted, are listed in the appendix A1.

217 A few patients stated that patient safety could be improved by better coordination of medication  
218 plans. Furthermore, patient safety was already depicted as part of the dimension “physical support”  
219 in the model [14]. Due to comments, we revised the model to add “patient safety” as a separate 16<sup>th</sup>  
220 dimension.

### 222 Results of round 2

223 In round 2, most ratings were very similar to the first round and medians did not change (see table  
224 3). The added dimension of patient safety was also considered relevant but currently insufficiently  
225 implemented. The adaptations we made based on the feedback were rated as “better than before”  
226 (all means over 7). This time, most relevant dimensions were “patient safety”, “teamwork and team  
227 building”, “access to care”, “patient information”, and “essential characteristics of clinicians”.  
228 “Clinician-patient communication”, “clinician-patient relationship”, and “physical support” again  
229 reached the best ratings regarding implementation. Additionally, the newly added dimension  
230 “patient safety” also reached equally high ratings.

232 **Table 3**

233 Results for the assessment of adaptation, relevance and implementation of the second round

| Adaptation (round one to round two) |   |    | Relevance |   |    | Implementation |   |    |
|-------------------------------------|---|----|-----------|---|----|----------------|---|----|
| Median                              | M | SD | Median    | M | SD | Median         | M | SD |



|                                                                               |   |      |      |   |      |      |   |      |      |
|-------------------------------------------------------------------------------|---|------|------|---|------|------|---|------|------|
| <b>1. Patient-centered characteristics of health care providers</b>           | - | -    | -    | 9 | 8,36 | 1,30 | 5 | 5,27 | 1,38 |
| <b>2. Trustful relationship</b>                                               | 8 | 7,64 | 1,59 | 9 | 8,18 | 1,34 | 6 | 5,47 | 1,44 |
| <b>3. Uniqueness of each patient</b>                                          | - | -    | -    | 9 | 8,30 | 1,24 | 5 | 5,17 | 1,50 |
| <b>4. Consideration of personal circumstances</b>                             | 8 | 7,14 | 1,80 | 9 | 8,07 | 1,36 | 5 | 4,83 | 1,61 |
| <b>5. Appropriate communication</b>                                           | - | -    | -    | 9 | 8,33 | 1,12 | 6 | 5,62 | 1,54 |
| <b>6. Integration of additional health care elements</b>                      | - | -    | -    | 8 | 7,46 | 1,67 | 5 | 4,61 | 1,81 |
| <b>7. Teamwork of health care providers</b>                                   | - | -    | -    | 9 | 8,45 | 1,04 | 5 | 5,08 | 1,75 |
| <b>8. Access to care</b>                                                      | 8 | 7,79 | 1,59 | 9 | 8,38 | 1,09 | 5 | 4,81 | 1,83 |
| <b>9. Good planning of care</b>                                               | 8 | 7,28 | 1,82 | 9 | 8,18 | 1,28 | 5 | 5,07 | 1,73 |
| <b>10. Patient safety</b>                                                     | - | -    | -    | 9 | 8,56 | 0,94 | 6 | 5,61 | 1,64 |
| <b>11. Personally tailored information</b>                                    | 8 | 7,86 | 1,43 | 9 | 8,37 | 1,02 | 5 | 5,03 | 1,82 |
| <b>12. Collaboration as equal partners and involvement in decision making</b> | - | -    | -    | 9 | 8,32 | 1,12 | 5 | 5,25 | 1,74 |
| <b>13. Involvement of family and friends</b>                                  | - | -    | -    | 7 | 6,85 | 2,01 | 5 | 4,92 | 1,91 |
| <b>14. Empowerment of patients</b>                                            | 8 | 7,59 | 1,41 | 9 | 8,15 | 1,23 | 5 | 5,21 | 1,77 |
| <b>15. Support of physical wellbeing</b>                                      | 8 | 7,40 | 1,74 | 9 | 8,18 | 1,26 | 6 | 5,55 | 1,71 |
| <b>16. Support of mental wellbeing</b>                                        | - | -    | -    | 9 | 8,25 | 1,33 | 5 | 4,87 | 1,85 |

234

### 235 Subgroup analyses

236 In every chronic disease group, distribution of patients participating via mail or online was similar  
 237 (approx. 45:55 ratio, respectively). There was no major age difference between mail- and online-  
 238 based participation (mean age (mail): 54.83 years (SD = 17.85), mean age (online): 49.35 years (SD =  
 239 14.88)). Due to small sizes of sub-samples (e.g. only 6 patients indicated to only have cancer),  
 240 differences in ratings depending on chronic disease groups could not be analyzed (i.e. via analysis of  
 241 variance). Neither multi-morbidity (at least two chronic disease groups indicated compared to only  
 242 one), nor type of participation (mail vs. online) did affect assessment of relevance and  
 243 implementation by patients. That is, there were no differences between means bigger than 1. The  
 244 only differences of means above 1 were found within different age groups. The implementation of  
 245 "access to care" was rated lower by young patients in comparison to older patients (M = 4.37 for  
 246 young vs. M = 5.38 for older patients). Implementation of "patient information" was also rated lower  
 247 by young patients (M = 4.70 for young vs. M = 5.71 for older patients).

248

### 249 DISCUSSION

250 In our study, we have assessed relevance and current degree of implementation of different  
 251 dimensions of PC in the German health care system from the patients' perspective. The findings  
 252 show that patients consider every dimension of PC very relevant but currently only mediocly  
 253 implemented. Furthermore, there were no evident factors influencing these results (e.g. way of  
 254 participation or multi-morbidity).

1  
2  
3 255 These results point out the relevance to ask patients when investigating PC. Comparing this  
4  
5 256 assessment with the experts' ratings of the same dimensions from the same model [14], differences  
6  
7 257 between expert and patient ratings become evident. For example, experts did not rate each  
8  
9 258 dimension as very relevant but patients did (e.g. involvement of family and friends which was less  
10  
11 259 relevant to experts but patients considered it relevant). This discrepancy is relevant for development  
12  
13 260 of strategies to foster implementation of PC in Germany. If only the experts' perspective is known,  
14  
15 261 implementation efforts might not match patient needs. Consequently, a more patient-centered care  
16  
17 262 can only be achieved by taking into account patients' perspectives.  
18  
19 263 Furthermore, the study reveals that, while patients in Germany find patient-centeredness extremely  
20  
21 264 relevant, they do not find it well implemented in the German health care system. Thus, interventions  
22  
23 265 to foster dimensions of patient-centeredness on the micro level of care (e.g. tools for clinicians and  
24  
25 266 patients) could be developed and evaluated in future research. Furthermore, the results can guide  
26  
27 267 the development of patient-reported experience measures. On the federal level, the results indicate  
28  
29 268 that the German health care system could benefit from stronger health policy directives in regard to  
30  
31 269 the delivery of patient-centered care.

### 270 **Strengths and limitations**

30 271 Major strengths of this study are the diverse sample from all over Germany and the possibility to  
31  
32 272 anonymously generate a group consensus by performing a Delphi study. By doing so, ratings of each  
33  
34 273 individual weren't affected by dominant people in group discussions, and therefore, are more likely  
35  
36 274 to be unbiased. Furthermore, another strength of this study are the response rates indicating little  
37  
38 275 drop out from round one to round two. This could be ascribed to the internal motivation of  
39  
40 276 participating patients wanting to ameliorate health care services in Germany. Another explanation  
41  
42 277 could be the financial compensation which they only received after having completed both rounds.  
43  
44 278 Nonetheless, there was little variation within ratings of relevance of the dimensions of PC. This could  
45  
46 279 indicate a lack of specification in the descriptions. Patients might have been unable to differentiate  
47  
48 280 between sub-aspects of a single description. Thus, they might have rated the whole dimension as  
49  
50 281 relevant even if they considered only some parts relevant enough to give a high score. Therefore,  
51  
52 282 additional qualitative approaches (e.g. by conducting semi-structured interviews) could help to  
53  
54 283 enrich findings and further explain results by specifying relevant aspects instead of broad  
55  
56 284 dimensions. Additionally, as our study focused on adding the patient perspective to the concept of  
57  
58 285 patient-centered care, we based our study on the integrative model of patient-centeredness, which  
59  
60 286 integrates over 400 definitions and models published between 1969 and 2012 [12]. We did not take  
287 into account further conceptual work published since (e.g. the framework developed by Santana and  
288 colleagues [30]) which can be considered a limitation of this study. Furthermore, it is unclear if the  
289 results are generalizable to other countries. Since health care systems differ substantially between

1  
2  
3 290 countries (e.g. role of government, coverage, organization of the delivery system, lengths of stay)  
4  
5 291 [20,31] patients' perspective on PCC might also differ. Further research is needed to evaluate the  
6  
7 292 patients' perspective in other countries. Finally, another limitation of our study was the relatively low  
8  
9 293 level of co-production with patients. As patients are recipients of PCC, this study could have  
10  
11 294 benefitted from a higher level of patient participation (e.g. [32]).

12 295 Regarding future studies or specific recommendations, policy makers or other stakeholders,  
13  
14 296 interested in fostering patient-centered health care, should therefore not only focus on the ratings of  
15  
16 297 relevance of experts but consider the patients rating, too. In their opinion, every dimension of  
17  
18 298 patient-centeredness is relevant. These results should not be neglected. When implementing  
19  
20 299 patient-centered care, a wholesome perspective is therefore needed.

21 300

## 22 301 **Conclusions**

23  
24 302 In summary, our study provides the patients' perspective on PC by assessing relevance and current  
25  
26 303 degree of implementation and enriches therefore current conceptualizations of PC. We showed that  
27  
28 304 patients consider every dimension of PC relevant, but currently not well implemented. Furthermore,  
29  
30 305 these results can be used for developing comprehensive questionnaires like patient-reported  
31  
32 306 experience measures regarding patient-centered care. Regarding the status quo, especially in  
33  
34 307 Germany, we therefore still need to make efforts since patients don't receive the patient-centered  
35  
36 308 health care they consider so relevant.

35 309

36 310

37 311

## 38 312 **REFERENCES**

- 39 313 1 Louw JM, Marcus TS, Hugo JFM. Patient- or person-centred practice in medicine? - A review of  
40  
41 314 concepts. *African J Prim Heal care Fam Med* 2017;**9**:e1–7. doi:10.4102/phcfm.v9i1.1455  
42  
43 315 2 Håkansson Eklund J, Holmström IK, Kumlin T, *et al.* "Same same or different?" A review of  
44  
45 316 reviews of person-centered and patient-centered care. *Patient Educ Couns* 2019;**102**:3–11.  
46  
47 317 doi:https://doi.org/10.1016/j.pec.2018.08.029  
48  
49 318 3 World Health Organization (WHO). WHO Framework on integrated people-centred health  
50  
51 319 services. <https://www.who.int/servicedeliverysafety/areas/people-centred-care/en/>  
52  
53 320 4 Härter M, Dirmaier J, Scholl I, *et al.* The long way of implementing patient-centered care and  
54  
55 321 shared decision making in Germany. *Z Evid Fortbild Qual Gesundheitswes* 2017;**123–124**:46–51.  
56  
57 322 doi:10.1016/j.zefq.2017.05.006  
58  
59 323 5 Bundesrat. *Gesetzesbeschluss des deutschen Bundestages. Gesetz zur Verbesserung der*  
60  
324 *Rechte von Patientinnen und Patienten (Patientenrechtegesetz)*. Retrieved from

- 1  
2  
3 325 [http://www.bmjv.de/SharedDocs/Downloads/DE/pdfs/Gesetze/Gesetz\\_zur\\_Verbesserung\\_de](http://www.bmjv.de/SharedDocs/Downloads/DE/pdfs/Gesetze/Gesetz_zur_Verbesserung_de)  
4  
5 326 [r\\_Rechte\\_von\\_Patientinnen\\_und\\_Patienten.pdf](http://www.bmjv.de/SharedDocs/Downloads/DE/pdfs/Gesetze/Gesetz_zur_Verbesserung_de);jsessionid=1185B669A9CD4A090FDE13ABA7  
6  
7 327 5890D2.1\_cid297?\_\_blob=publicationFile [cited 2014 04.12.2014]: 2013.
- 8 328 6 Baumgart J. Ambivalentes Verhältnis. *Dtsch Arztebl* 2010;**107**:2554–7.
- 9  
10 329 7 Rathert C, Wyrwich MD, Boren SA. Patient-centered care and outcomes: a systematic review  
11  
12 330 of the literature. *Med care Res Rev* 2013;**70**:351–79. doi:10.1177/1077558712465774
- 13 331 8 Epstein RM, Franks P, Fiscella K, *et al.* Measuring patient-centered communication in patient-  
14  
15 332 physician consultations: Theoretical and practical issues. *Soc Sci Med* 2005;**61**:1516–  
16  
17 333 28.[internal-pdf://epstein\\_2005-3931253760/Epstein\\_2005.pdf](http://www.ncbi.nlm.nih.gov/entrez/query.fcgi?cmd=Retrieve&db=PubMed&dopt=Citation&list_uids=11005395)
- 18 334 9 Mead N, Bower P. Patient-centredness: A conceptual framework and review of the empirical  
19  
20 335 literature. *Soc Sci Med* 2000;**51**:1087–  
21  
22 336 110.[http://www.ncbi.nlm.nih.gov/entrez/query.fcgi?cmd=Retrieve&db=PubMed&dopt=Citati](http://www.ncbi.nlm.nih.gov/entrez/query.fcgi?cmd=Retrieve&db=PubMed&dopt=Citation&list_uids=11005395)  
23  
24 337 [on&list\\_uids=11005395](http://www.ncbi.nlm.nih.gov/entrez/query.fcgi?cmd=Retrieve&db=PubMed&dopt=Citation&list_uids=11005395)
- 25 338 10 Ouwens M, Hermens R, Hulscher M, *et al.* Development of indicators for patient-centred  
26  
27 339 cancer care. *Support Care cancer* 2010;**18**:121.
- 28 340 11 Stewart MA, Brown JB, Weston W, *et al.* *Patient-centered medicine - Transforming the clinical*  
29  
30 341 *method*. Abingdon: : Radcliffe Medical Press 2003.
- 31  
32 342 12 Scholl I, Zill JM, Härter M, *et al.* An integrative model of patient-centeredness - A systematic  
33  
34 343 review and concept analysis. *PLoS One* 2014;**9**:e107828. doi:10.1371/journal.pone.0107828
- 35 344 13 van Dulmen S. Patient-centredness. *Patient Educ Couns* 2003;**51**:195–6. doi:10.1016/S0738-  
36  
37 345 3991(03)00039-9
- 38 346 14 Zill JM, Scholl I, Härter M, *et al.* Which Dimensions of Patient-Centeredness Matter? - Results  
39  
40 347 of a Web-Based Expert Delphi Survey. *PLoS One* 2015;**10**:e0141978.  
41  
42 348 doi:10.1371/journal.pone.0141978
- 43 349 15 Bensing J, Rimondini M, Visser A. What patients want. *Patient Educ Couns* 2013;**90**:287–90.  
44  
45 350 doi:10.1016/j.pec.2013.01.005
- 46 351 16 Hudon C, Fortin M, Haggerty J, *et al.* Patient-centered care in chronic disease management: a  
47  
48 352 thematic analysis of the literature in family medicine. *Patient Educ Couns* 2012;**88**:170–6.  
49  
50 353 doi:10.1016/j.pec.2012.01.009
- 51  
52 354 17 Luxford K. What does the patient know about quality? *Int J Qual Heal Care* 2012;**24**:439–40.  
53  
54 355 doi:10.1093/intqhc/mzs053
- 55 356 18 Maassen EF, Schrevel SJC, Dedding CWM, *et al.* Comparing patients' perspectives of "good  
56  
57 357 care" in Dutch outpatient psychiatric services with academic perspectives of patient-centred  
58  
59 358 care. *J Ment Heal* 2017;**26**:84–94. doi:10.3109/09638237.2016.1167848
- 60 359 19 Yasein NA, Shakhathreh FM, Shroukh WA, *et al.* A Comparison between Patients' and

- 1  
2  
3 360 Residents' Perceptions of Patient Centeredness and Communication Skills among Physicians  
4  
5 361 Working at Jordan University Hospital. *Open J Nurs* 2017;**07**:698–706.  
6  
7 362 doi:10.4236/ojn.2017.76052  
8 363 20 Busse R, Riesberg A, World Health Organization. Health care systems in transition: Germany.  
9  
10 364 Copenhagen: WHO Regional Office for Europe 2004.  
11 365 21 Mossialos E, Djordjevic A, Osborn R, *et al.* International Profiles of Health Care Systems.  
12  
13 366 Published Online First: 2017. doi:10.1056/NEJMp0910064  
14  
15 367 22 Christalle E, Zeh S, Hahlweg P, *et al.* Assessment of patient centredness through patient-  
16  
17 368 reported experience measures (ASPIRED): Protocol of a mixed-methods study. *BMJ Open*  
18  
19 369 2018;**8**:9–13. doi:10.1136/bmjopen-2018-025896  
20 370 23 Boulkedid R, Abdoul H, Loustau M, *et al.* Using and reporting the delphi method for selecting  
21  
22 371 healthcare quality indicators: A systematic review. *PLoS One* 2011;**6**:e20476.  
23  
24 372 doi:10.1371/journal.pone.0020476  
25 373 24 Hasson F, Keeney S, McKenna H. Research guidelines for the Delphi survey technique. *J Adv*  
26  
27 374 *Nurs* 2000;**32**:1008–15.  
28 375 25 van Rijssen LB, Gerritsen A, Henselmans I, *et al.* Core Set of Patient-reported Outcomes in  
29  
30 376 Pancreatic Cancer (COPRAC): An International Delphi Study Among Patients and Health Care  
31  
32 377 Providers. *Ann Surg* 2019;**270**:158–64. doi:10.1097/SLA.0000000000002633  
33  
34 378 26 Bundesministerium für Arbeit und Soziales. Leichte Sprache - Ein Ratgeber. 2014.  
35 379 27 Limesurvey GmbH. An Open Source survey tool /LimeSurvey GmbH, Hamburg, Germany.  
36  
37 380 28 Jünger S, Payne SA, Brine J, *et al.* Guidance on Conducting and REporting DELphi Studies  
38  
39 381 (CREDES) in palliative care: Recommendations based on a methodological systematic review.  
40  
41 382 *Palliat Med* 2017;**31**:684–706. doi:10.1177/0269216317690685  
42  
43 383 29 IBM SPSS Statistics for Windows. 2015.  
44  
45 384 30 Santana MJ, Manalili K, Jolley RJ, *et al.* How to practice person-centred care: A conceptual  
46  
47 385 framework. *Heal Expect* 2018;**21**:429–40. doi:10.1111/hex.12640  
48  
49 386 31 Eurostat. Hospital discharges and length of stay for inpatient and curative care. 2018;:1–  
50  
51 387 16.<http://appsso.eurostat.ec.europa.eu/nui/submitViewTableAction.do>  
52  
53 388 32 Sacristan JA, Aguaron A, Avendaño C, *et al.* Patient involvement in clinical research: why,  
54  
55 389 when, and how. *Patient Prefer Adherence* 2016;**10**:631–40. doi:10.2147/PPA.S104259  
56  
57 390  
58 391  
59 392  
60 393  
394

1  
2  
3 395  
4  
5 396  
6  
7 397  
8 398  
9  
10 399  
11 400  
12  
13 401  
14  
15 402  
16  
17 403  
18 404  
19  
20 405  
21  
22 406  
23 407  
24  
25 408  
26  
27 409  
28 410  
29  
30 411  
31  
32 412  
33 413  
34  
35 414  
36  
37 415  
38 416  
39  
40 417  
41  
42 418  
43 419  
44  
45 420  
46  
47 421  
48 422  
49  
50 423  
51  
52 424  
53 425  
54  
55 426  
56  
57 427  
58 428  
59  
60 429

For peer review only

1  
2  
3 430 **AUTHOR STATEMENT**

4 431 IS is the responsible principle investigator of the study. IS, PH and MH were involved in planning and  
5 432 preparation of the study. SZ and EC recruited participants and collected data, SZ analyzed the data.  
6 433 SZ, IS, EC and PH interpreted the results. SZ wrote the first draft of the manuscript. IS, EC, PH, MH  
7 434 critically revised the manuscript for relevant intellectual content. All authors gave final approval of  
8 435 the version to be published and agree to be accountable for the work.  
9 436

10 437 **DATA STATEMENT**

11 438 Corresponding with data transparency, data files can be made available with adaptations  
12 439 (pseudonyms and comments deleted due to data security) upon contacting the authors.  
13 440

14 441 **CONFLICT OF INTERESTS**

15 442 PH gave one scientific presentation on shared decision-making during a lunch symposium, for which  
16 443 she received compensation and travel compensation from GlaxoSmithKline GmbH (pharmaceutical  
17 444 company) in 2018. The other authors declare that they have no competing interests.  
18 445

19 446 **FUNDING STATEMENT**

20 447 This study is funded by the German Federal Ministry of Education and Research (Bundesministerium  
21 448 für Bildung und Forschung – BMBF) with the grant number 01GY1614. The funder had no role in  
22 449 decision to publish or preparation of the manuscript.  
23 450

24 451 **ACKNOWLEDGEMENT**

25 452 We thank our student assistant Tanja Kloster and our research intern Lara Dreyer for supporting us  
26 453 preparing the manuscript and transcribing the interviews.  
27 454

28 455 **ETHICS APPROVAL AND CONSENT TO PARTICIPATE**

29 456 The study was carried out according to the latest version of the Helsinki Declaration of the World  
30 457 Medical Association. Principles of good scientific practice were respected. The study had been  
31 458 approved by the Ethics Committee of the Medical Association Hamburg (study ID: PV5724) prior to  
32 459 the start of data collection. Study participation was voluntary and no foreseeable risks for  
33 460 participants resulted from the participation in this study. Participants were fully informed about the  
34 461 aims of the study, data collection, and the use of collected data. Written informed consent was  
35 462 obtained prior to participation. Preserving principles of data sensitivity, data protection, and  
36 463 confidentiality requirements were met.  
37 464

1  
2  
3  
4  
5  
6  
7  
8  
9  
10  
11  
12  
13  
14  
15  
16  
17  
18  
19  
20  
21  
22  
23  
24  
25  
26  
27  
28  
29  
30  
31  
32  
33  
34  
35  
36  
37  
38  
39  
40  
41  
42  
43  
44  
45  
46  
47  
48  
49  
50  
51  
52  
53  
54  
55  
56  
57  
58  
59  
60

465 **APPENDIX**

466 A1: Descriptions of the dimensions of PC (mail-based version)

467

[Insert A1 here]

469

470 S1: Overview of diseases indicated by patients (online supplement)

471

[Insert S1 here]

473

474 **Descriptions for figures:**

475 Figure 1. Integrative model of patient-centeredness

476 Figure 2. Flow chart for the Delphi study

477

For peer review only



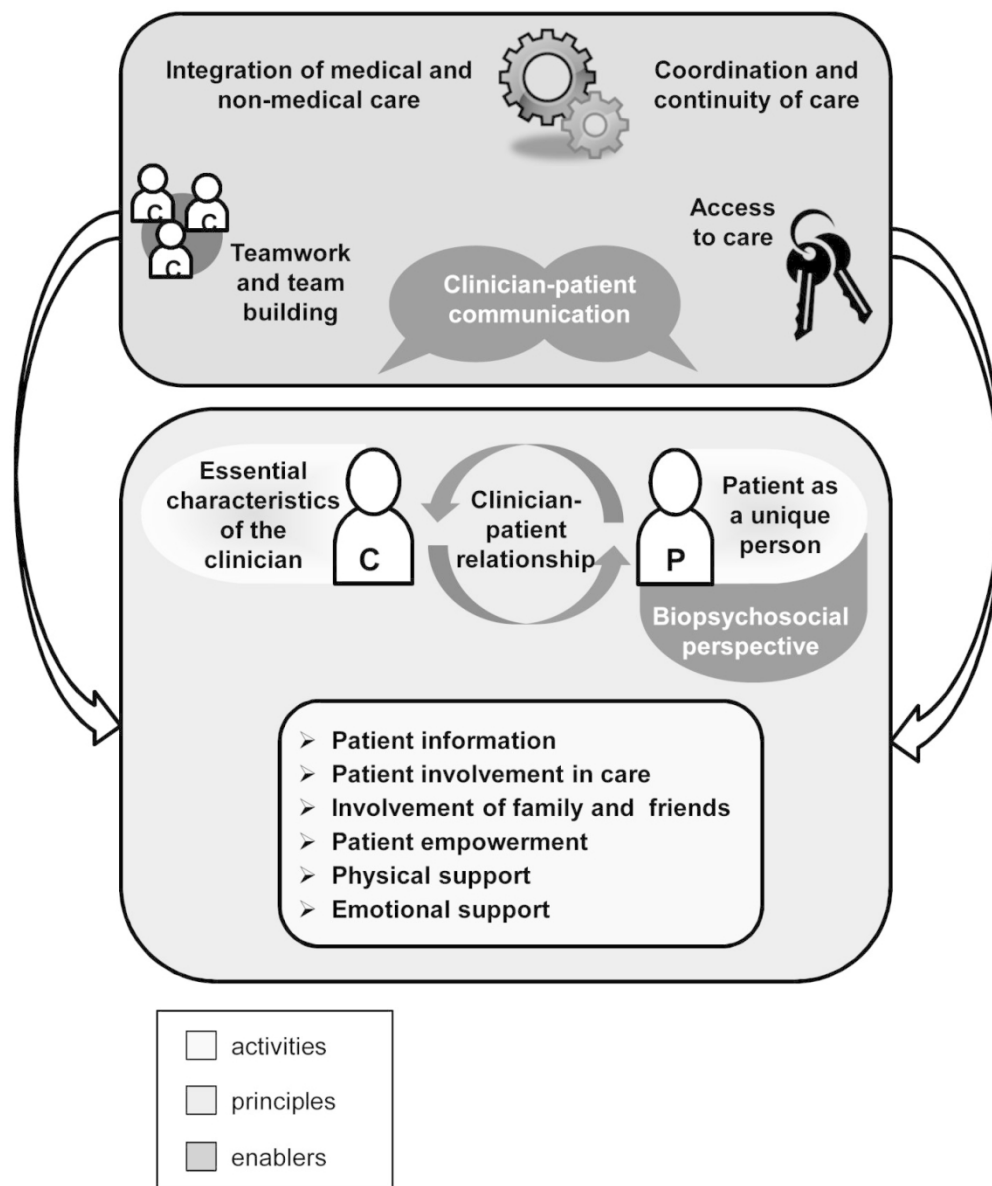

Figure 1. Integrative model of patient-centeredness

119x142mm (300 x 300 DPI)

1  
2  
3  
4  
5  
6  
7  
8  
9  
10  
11  
12  
13  
14  
15  
16  
17  
18  
19  
20  
21  
22  
23  
24  
25  
26  
27  
28  
29  
30  
31  
32  
33  
34  
35  
36  
37  
38  
39  
40  
41  
42  
43  
44  
45  
46  
47  
48  
49  
50  
51  
52  
53  
54  
55  
56  
57  
58  
59  
60

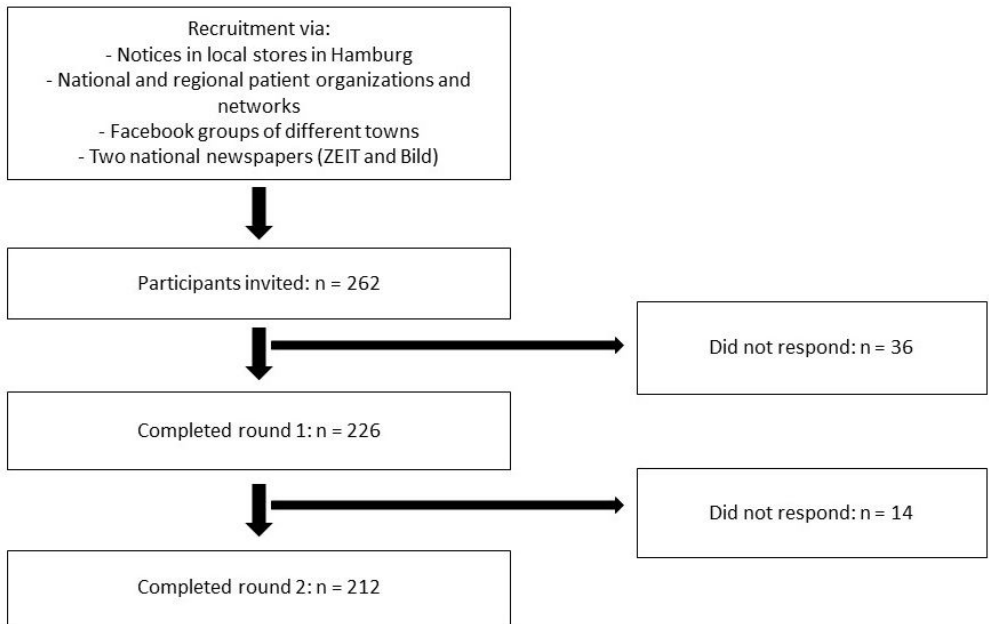

Figure 2. Flow chart for the Delphi study

74x47mm (300 x 300 DPI)

Teilnehmercode: X

## Fragebogen für Patientinnen und Patienten

### Projekt „Patientenerfahrungen im Gesundheitswesen“

**Liebe Patientin, lieber Patient,**

Wir danken Ihnen herzlich für Ihre Antworten zu dem ersten Fragebogen. Wir haben uns Ihre Antworten durchgelesen und gemeinsam besprochen. Die häufigsten Rückmeldungen haben wir versucht einzuarbeiten. Das heißt, dass wir die Beschreibungen teilweise geändert haben. Die Änderungen haben wir jeweils **gelb** markiert. Außerdem ist ein Bestandteil, nämlich „Patientensicherheit“, neu hinzugekommen. Wir möchten Sie bitten, zu bewerten, ob Sie die Beschreibungen mit den Veränderungen besser oder schlechter finden.

Außerdem sehen Sie zu jedem Bestandteil Ihre Bewertung aus dem ersten Fragebogen sowie die Bewertung aller Teilnehmenden. Wir möchten Sie bitten, die Wichtigkeit und die Umsetzung aller Bestandteile noch einmal zu bewerten.

Wir verstehen, dass die Beschreibungen viele verschiedene Punkte beinhalten und es Ihnen deshalb manchmal schwerfällt, sie insgesamt zu bewerten. Besonders bei der Frage nach der Umsetzung kann das schwierig sein, weil Sie mit verschiedenen Behandlerinnen und Behandlern unterschiedliche Erfahrungen gemacht haben. Bitte versuchen Sie dennoch alles gemeinsam im Mittel zu bewerten.

Es gibt keine richtigen oder falschen Antworten.

Wenn Sie den Fragebogen ausgefüllt haben, stecken Sie ihn bitte in den beigegefügt Briefumschlag, verschließen ihn und versenden ihn (die Versandgebühr zahlt das Universitätsklinikum).

Wir freuen uns sehr, dass Sie an der Befragung teilnehmen. Bereits an dieser Stelle danken wir Ihnen ganz herzlich für Ihre Unterstützung.



Dr. phil. Isabelle Scholl  
(Projektleiterin)



Stefan Zeh, M.Sc.  
(Projektmitarbeiter)



Eva Christalle, M.Sc.  
(Projektmitarbeiterin)

## Überblick der Bestandteile von Patientorientierung:

### I. Patientenorientierte Grundhaltung

1. Patientenorientierte Merkmale der Behandler/innen
2. Vertrauensvolles Miteinander
3. Einzigartigkeit jeder Patientin/ jedes Patienten
4. Berücksichtigung der Lebensumstände

### II. Rahmenbedingungen der Patientenorientierung

5. Angemessene Kommunikation
6. Einbezug ergänzender Angebote
7. Zusammenarbeit von Behandlern
8. Zugang zur Behandlung
9. Gute Planung der Behandlung

#### 10. Patientensicherheit

### III. Konkrete Handlungen und Maßnahmen

11. Persönlich angepasste Informationen
12. Gleichberechtigte Zusammenarbeit und Beteiligung bei Entscheidungen
13. Beteiligung von Familie und Freunden
14. Aktivierung der Patientinnen und Patienten
15. Unterstützung des körperlichen Wohlbefindens
16. Unterstützung des psychischen Wohlbefindens

#### **Vorbemerkung:**

Behandler/innen meint alle Berufsgruppen, die sich um Patientinnen und Patienten kümmern. Dies sind zum Beispiel Ärztinnen und Ärzte, Pflegefachkräfte, Physiotherapeutinnen und Physiotherapeuten sowie Psychologinnen und Psychologen. Da wir eine möglichst kurze Beschreibung verwenden möchten, haben wir uns für einen Sammelbegriff entschieden. In Ihrer Behandlung sind vielleicht alle genannten Berufsgruppen beteiligt, möglicherweise sogar noch mehr. Wenn Sie daher „Behandlerin“ oder „Behandler“ lesen, bitte denken Sie dabei an alle behandelnden Berufsgruppen, die an Ihrer Behandlung beteiligt sind.

## I. Patientenorientierte Grundhaltung

### 1. Patientenorientierte Merkmale der Behandler/innen

Die Behandler/innen sind:

- einfühlsam
- ehrlich
- wertschätzend

Die Behandler/innen sind sich des eigenen Verhaltens und der eigenen Gefühle bewusst. Die Behandler/innen verfügen über eine gute fachliche Kompetenz.

Bewertung der Wichtigkeit durch alle Teilnehmenden im Mittel: **X**

Ihre persönliche Bewertung der Wichtigkeit: **X**

a) Wie wichtig finden Sie diesen Bestandteil?

|               |                          |                          |                          |                          |                          |                          |                          |                          |                          |         |
|---------------|--------------------------|--------------------------|--------------------------|--------------------------|--------------------------|--------------------------|--------------------------|--------------------------|--------------------------|---------|
| Überhaupt     | <input type="checkbox"/> | Äußerst |
| nicht wichtig | 1                        | 2                        | 3                        | 4                        | 5                        | 6                        | 7                        | 8                        | 9                        | wichtig |

Bewertung der Umsetzung durch alle Teilnehmenden im Mittel: **X**

Ihre persönliche Bewertung der Umsetzung: **X**

b) Wie gut ist dieser Bestandteil Ihrer Erfahrung nach derzeit in Deutschland umgesetzt?

|                 |                          |                          |                          |                          |                          |                          |                          |                          |                          |             |
|-----------------|--------------------------|--------------------------|--------------------------|--------------------------|--------------------------|--------------------------|--------------------------|--------------------------|--------------------------|-------------|
| Überhaupt       | <input type="checkbox"/> | Vollständig |
| nicht umgesetzt | 1                        | 2                        | 3                        | 4                        | 5                        | 6                        | 7                        | 8                        | 9                        | umgesetzt   |

### 2. Vertrauensvolles Miteinander

Es besteht ein vertrauensvolles Miteinander zwischen Ihnen und der Behandlerin / dem Behandler. Wenn möglich gibt es gleichbleibende Ansprechpartner/innen. **Vor dem Gespräch informiert sich die Behandlerin / der Behandler über Ihren bisherigen Erkrankungsverlauf. Die Behandlerin / der Behandler spricht Sie auf bestehende Beschwerden und Ihr aktuelles Befinden an.**

a) Finden Sie, dass die Beschreibung mit den Veränderungen besser oder schlechter ist?

|            |                          |                          |                          |                          |                          |                          |                          |                          |                          |           |
|------------|--------------------------|--------------------------|--------------------------|--------------------------|--------------------------|--------------------------|--------------------------|--------------------------|--------------------------|-----------|
| Sehr viel  | <input type="checkbox"/> | Sehr viel |
| schlechter | 1                        | 2                        | 3                        | 4                        | 5                        | 6                        | 7                        | 8                        | 9                        | besser    |

Bewertung der Wichtigkeit durch alle Teilnehmenden im Mittel: **X**

Ihre persönliche Bewertung der Wichtigkeit: **X**

b) Wie wichtig finden Sie diesen Bestandteil?

|               |                          |                          |                          |                          |                          |                          |                          |                          |                          |         |
|---------------|--------------------------|--------------------------|--------------------------|--------------------------|--------------------------|--------------------------|--------------------------|--------------------------|--------------------------|---------|
| Überhaupt     | <input type="checkbox"/> | Äußerst |
| nicht wichtig | 1                        | 2                        | 3                        | 4                        | 5                        | 6                        | 7                        | 8                        | 9                        | wichtig |

Bewertung der Umsetzung durch alle Teilnehmenden im Mittel: **X**

Ihre persönliche Bewertung der Umsetzung: **X**

c) Wie gut ist dieser Bestandteil Ihrer Erfahrung nach derzeit in Deutschland umgesetzt?

|                 |                          |                          |                          |                          |                          |                          |                          |                          |                          |             |
|-----------------|--------------------------|--------------------------|--------------------------|--------------------------|--------------------------|--------------------------|--------------------------|--------------------------|--------------------------|-------------|
| Überhaupt       | <input type="checkbox"/> | Vollständig |
| nicht umgesetzt | 1                        | 2                        | 3                        | 4                        | 5                        | 6                        | 7                        | 8                        | 9                        | umgesetzt   |

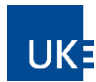

### 3. Einzigartigkeit jeder Patientin/ jedes Patienten

Die Behandler/innen gehen ein auf:

- Bedürfnisse
- Wünsche
- Sorgen
- Erwartungen

Sie erkennen an, dass Menschen verschieden sind.

Bewertung der Wichtigkeit durch alle Teilnehmenden im Mittel: **X**

Ihre persönliche Bewertung der Wichtigkeit: **X**

a) Wie wichtig finden Sie diesen Bestandteil?

|               |                          |                          |                          |                          |                          |                          |                          |                          |                          |         |
|---------------|--------------------------|--------------------------|--------------------------|--------------------------|--------------------------|--------------------------|--------------------------|--------------------------|--------------------------|---------|
| Überhaupt     | <input type="checkbox"/> | Äußerst |
| nicht wichtig | 1                        | 2                        | 3                        | 4                        | 5                        | 6                        | 7                        | 8                        | 9                        | wichtig |

Bewertung der Umsetzung durch alle Teilnehmenden im Mittel: **X**

Ihre persönliche Bewertung der Umsetzung: **X**

b) Wie gut ist dieser Bestandteil Ihrer Erfahrung nach derzeit in Deutschland umgesetzt?

|                 |                          |                          |                          |                          |                          |                          |                          |                          |                          |             |
|-----------------|--------------------------|--------------------------|--------------------------|--------------------------|--------------------------|--------------------------|--------------------------|--------------------------|--------------------------|-------------|
| Überhaupt       | <input type="checkbox"/> | Vollständig |
| nicht umgesetzt | 1                        | 2                        | 3                        | 4                        | 5                        | 6                        | 7                        | 8                        | 9                        | umgesetzt   |

### 4. Berücksichtigung der Lebensumstände

Die Behandler/innen sehen Sie als ganze Menschen. Es werden bei der Behandlung alle Lebensbereiche einbezogen.

Beispiele dafür sind:

- Körper
- Psyche/ Seele
- Familie und Freunde
- Beruf und Freizeit

a) Finden Sie, dass die Beschreibung mit den Veränderungen besser oder schlechter ist?

|            |                          |                          |                          |                          |                          |                          |                          |                          |                          |           |
|------------|--------------------------|--------------------------|--------------------------|--------------------------|--------------------------|--------------------------|--------------------------|--------------------------|--------------------------|-----------|
| Sehr viel  | <input type="checkbox"/> | Sehr viel |
| schlechter | 1                        | 2                        | 3                        | 4                        | 5                        | 6                        | 7                        | 8                        | 9                        | besser    |

Bewertung der Wichtigkeit durch alle Teilnehmenden im Mittel: **X**

Ihre persönliche Bewertung der Wichtigkeit: **X**

b) Wie wichtig finden Sie diesen Bestandteil?

|               |                          |                          |                          |                          |                          |                          |                          |                          |                          |         |
|---------------|--------------------------|--------------------------|--------------------------|--------------------------|--------------------------|--------------------------|--------------------------|--------------------------|--------------------------|---------|
| Überhaupt     | <input type="checkbox"/> | Äußerst |
| nicht wichtig | 1                        | 2                        | 3                        | 4                        | 5                        | 6                        | 7                        | 8                        | 9                        | wichtig |

Bewertung der Umsetzung durch alle Teilnehmenden im Mittel: **X**

Ihre persönliche Bewertung der Umsetzung: **X**

c) Wie gut ist dieser Bestandteil Ihrer Erfahrung nach derzeit in Deutschland umgesetzt?

|                 |                          |                          |                          |                          |                          |                          |                          |                          |                          |             |
|-----------------|--------------------------|--------------------------|--------------------------|--------------------------|--------------------------|--------------------------|--------------------------|--------------------------|--------------------------|-------------|
| Überhaupt       | <input type="checkbox"/> | Vollständig |
| nicht umgesetzt | 1                        | 2                        | 3                        | 4                        | 5                        | 6                        | 7                        | 8                        | 9                        | umgesetzt   |

## II. Rahmenbedingungen der Patientorientierung

### 5. Angemessene Kommunikation

Die Behandler/innen kommunizieren angemessen und unterstützend mit Ihnen. Beispiele dafür sind:

- Leicht verständliche Sprache
- Fragen stellen
- Aufmerksam zuhören
- Blickkontakt halten

Bewertung der Wichtigkeit durch alle Teilnehmenden im Mittel: **X**

Ihre persönliche Bewertung der Wichtigkeit: **X**

a) Wie wichtig finden Sie diesen Bestandteil?

|               |                          |                          |                          |                          |                          |                          |                          |                          |                          |         |
|---------------|--------------------------|--------------------------|--------------------------|--------------------------|--------------------------|--------------------------|--------------------------|--------------------------|--------------------------|---------|
| Überhaupt     | <input type="checkbox"/> | Äußerst |
| nicht wichtig | 1                        | 2                        | 3                        | 4                        | 5                        | 6                        | 7                        | 8                        | 9                        | wichtig |

Bewertung der Umsetzung durch alle Teilnehmenden im Mittel: **X**

Ihre persönliche Bewertung der Umsetzung: **X**

b) Wie gut ist dieser Bestandteil Ihrer Erfahrung nach derzeit in Deutschland umgesetzt?

|                 |                          |                          |                          |                          |                          |                          |                          |                          |                          |             |
|-----------------|--------------------------|--------------------------|--------------------------|--------------------------|--------------------------|--------------------------|--------------------------|--------------------------|--------------------------|-------------|
| Überhaupt       | <input type="checkbox"/> | Vollständig |
| nicht umgesetzt | 1                        | 2                        | 3                        | 4                        | 5                        | 6                        | 7                        | 8                        | 9                        | umgesetzt   |

### 6. Einbezug ergänzender Angebote

Ergänzende Angebote werden anerkannt und in die Behandlung einbezogen, falls Sie sich das wünschen.

Beispiele dafür sind:

- Selbsthilfegruppen
- Alternativmedizin / Komplementärmedizin (z.B. Homöopathie, Osteopathie, Akupunktur und Naturheilkunde)
- Spirituelle Unterstützung / Seelsorge

Bewertung der Wichtigkeit durch alle Teilnehmenden im Mittel: **X**

Ihre persönliche Bewertung der Wichtigkeit: **X**

a) Wie wichtig finden Sie diesen Bestandteil?

|               |                          |                          |                          |                          |                          |                          |                          |                          |                          |         |
|---------------|--------------------------|--------------------------|--------------------------|--------------------------|--------------------------|--------------------------|--------------------------|--------------------------|--------------------------|---------|
| Überhaupt     | <input type="checkbox"/> | Äußerst |
| nicht wichtig | 1                        | 2                        | 3                        | 4                        | 5                        | 6                        | 7                        | 8                        | 9                        | wichtig |

Bewertung der Umsetzung durch alle Teilnehmenden im Mittel: **X**

Ihre persönliche Bewertung der Umsetzung: **X**

b) Wie gut ist dieser Bestandteil Ihrer Erfahrung nach derzeit in Deutschland umgesetzt?

|                 |                          |                          |                          |                          |                          |                          |                          |                          |                          |             |
|-----------------|--------------------------|--------------------------|--------------------------|--------------------------|--------------------------|--------------------------|--------------------------|--------------------------|--------------------------|-------------|
| Überhaupt       | <input type="checkbox"/> | Vollständig |
| nicht umgesetzt | 1                        | 2                        | 3                        | 4                        | 5                        | 6                        | 7                        | 8                        | 9                        | umgesetzt   |



## 7. Zusammenarbeit von Behandlern

Innerhalb einer großen Praxis oder eines Krankenhauses hat die Zusammenarbeit einen hohen Stellenwert. Behandler/innen aus verschiedenen medizinischen Fachbereichen und Berufsgruppen arbeiten gut als Team zusammen. Die Zusammenarbeit ist geprägt von:

- Guten Absprachen
- Respekt
- Vertrauen
- Gemeinsamer Verantwortung

Die Leitungsebene fördert diese Teamarbeit.

Bewertung der Wichtigkeit durch alle Teilnehmenden im Mittel: **X**

Ihre persönliche Bewertung der Wichtigkeit: **X**

a) Wie wichtig finden Sie diesen Bestandteil?

|               |                          |                          |                          |                          |                          |                          |                          |                          |                          |         |
|---------------|--------------------------|--------------------------|--------------------------|--------------------------|--------------------------|--------------------------|--------------------------|--------------------------|--------------------------|---------|
| Überhaupt     | <input type="checkbox"/> | Äußerst |
| nicht wichtig | 1                        | 2                        | 3                        | 4                        | 5                        | 6                        | 7                        | 8                        | 9                        | wichtig |

Bewertung der Umsetzung durch alle Teilnehmenden im Mittel: **X**

Ihre persönliche Bewertung der Umsetzung: **X**

b) Wie gut ist dieser Bestandteil Ihrer Erfahrung nach derzeit in Deutschland umgesetzt?

|                 |                          |                          |                          |                          |                          |                          |                          |                          |                          |             |
|-----------------|--------------------------|--------------------------|--------------------------|--------------------------|--------------------------|--------------------------|--------------------------|--------------------------|--------------------------|-------------|
| Überhaupt       | <input type="checkbox"/> | Vollständig |
| nicht umgesetzt | 1                        | 2                        | 3                        | 4                        | 5                        | 6                        | 7                        | 8                        | 9                        | umgesetzt   |



## 8. Zugang zur Behandlung

Sie erreichen Behandler/innen leicht und ohne Hindernisse.

Beispiele hierfür sind:

- Krankenhäuser und Arztpraxen in der Nähe des Wohnortes (auch auf dem Land)
- Guter Zugang zur Behandlung auch bei möglichen Hindernissen (z.B. Behinderung oder mangelnden Deutschkenntnissen)
- Möglichst geringe Zuzahlungen bei Kassenleistungen **unter Berücksichtigung Ihrer finanziellen Möglichkeiten**
- **Gute Terminvergabe: Sie erhalten Termine rechtzeitig (auch Facharzttermine) und flexibel (z.B. auch telefonisch oder per Mail). Es wird ausreichend Zeit für den Termin eingeplant**
- **Bei einem Notfall erhalten Sie eine Behandlung auch außerhalb der üblichen Praxiszeiten (z.B. Bereitschaftsdienst oder Hausbesuche).**
- **Sie erhalten leicht Informationen darüber, welche Behandler/innen welche Behandlungen und Spezialisierungen anbieten.**

a) Finden Sie, dass die Beschreibung mit den Veränderungen besser oder schlechter ist?

|                      |                          |                          |                          |                          |                          |                          |                          |                          |                          |                          |                  |
|----------------------|--------------------------|--------------------------|--------------------------|--------------------------|--------------------------|--------------------------|--------------------------|--------------------------|--------------------------|--------------------------|------------------|
| Sehr viel schlechter | <input type="checkbox"/> | Sehr viel besser |
|                      | 1                        | 2                        | 3                        | 4                        | 5                        | 6                        | 7                        | 8                        | 9                        |                          |                  |

Bewertung der Wichtigkeit durch alle Teilnehmenden im Mittel: **X**

Ihre persönliche Bewertung der Wichtigkeit: **X**

b) Wie wichtig finden Sie diesen Bestandteil?

|                         |                          |                          |                          |                          |                          |                          |                          |                          |                          |                          |                 |
|-------------------------|--------------------------|--------------------------|--------------------------|--------------------------|--------------------------|--------------------------|--------------------------|--------------------------|--------------------------|--------------------------|-----------------|
| Überhaupt nicht wichtig | <input type="checkbox"/> | Äußerst wichtig |
|                         | 1                        | 2                        | 3                        | 4                        | 5                        | 6                        | 7                        | 8                        | 9                        |                          |                 |

Bewertung der Umsetzung durch alle Teilnehmenden im Mittel: **X**

Ihre persönliche Bewertung der Umsetzung: **X**

c) Wie gut ist dieser Bestandteil Ihrer Erfahrung nach derzeit in Deutschland umgesetzt?

|                           |                          |                          |                          |                          |                          |                          |                          |                          |                          |                          |                       |
|---------------------------|--------------------------|--------------------------|--------------------------|--------------------------|--------------------------|--------------------------|--------------------------|--------------------------|--------------------------|--------------------------|-----------------------|
| Überhaupt nicht umgesetzt | <input type="checkbox"/> | Vollständig umgesetzt |
|                           | 1                        | 2                        | 3                        | 4                        | 5                        | 6                        | 7                        | 8                        | 9                        |                          |                       |



## 9. Gute Planung der Behandlung

Es wird eine aufeinander abgestimmte und fortlaufende Behandlung sichergestellt.

Das bedeutet:

- Aufeinanderfolgende Behandlungen werden abgesprochen und geplant
- Termine zur Kontrolle und Nachsorge werden vereinbart
- Gute Absprachen beim Wechsel zwischen Krankenhäusern und Arztpraxen

Sie erhalten auf Wunsch Unterstützung durch einen festen Ansprechpartner im Gesundheitswesen, der Ihnen dabei hilft, die Behandlungen und Termine zu organisieren.

a) Finden Sie, dass die Beschreibung mit den Veränderungen besser oder schlechter ist?

|                      |                          |                          |                          |                          |                          |                          |                          |                          |                          |                  |
|----------------------|--------------------------|--------------------------|--------------------------|--------------------------|--------------------------|--------------------------|--------------------------|--------------------------|--------------------------|------------------|
| Sehr viel schlechter | <input type="checkbox"/> | Sehr viel besser |
|                      | 1                        | 2                        | 3                        | 4                        | 5                        | 6                        | 7                        | 8                        | 9                        |                  |

Bewertung der Wichtigkeit durch alle Teilnehmenden im Mittel: X

Ihre persönliche Bewertung der Wichtigkeit: X

b) Wie wichtig finden Sie diesen Bestandteil?

|                         |                          |                          |                          |                          |                          |                          |                          |                          |                          |                 |
|-------------------------|--------------------------|--------------------------|--------------------------|--------------------------|--------------------------|--------------------------|--------------------------|--------------------------|--------------------------|-----------------|
| Überhaupt nicht wichtig | <input type="checkbox"/> | Äußerst wichtig |
|                         | 1                        | 2                        | 3                        | 4                        | 5                        | 6                        | 7                        | 8                        | 9                        |                 |

Bewertung der Umsetzung durch alle Teilnehmenden im Mittel: X

Ihre persönliche Bewertung der Umsetzung: X

c) Wie gut ist dieser Bestandteil Ihrer Erfahrung nach derzeit in Deutschland umgesetzt?

|                           |                          |                          |                          |                          |                          |                          |                          |                          |                          |                       |
|---------------------------|--------------------------|--------------------------|--------------------------|--------------------------|--------------------------|--------------------------|--------------------------|--------------------------|--------------------------|-----------------------|
| Überhaupt nicht umgesetzt | <input type="checkbox"/> | Vollständig umgesetzt |
|                           | 1                        | 2                        | 3                        | 4                        | 5                        | 6                        | 7                        | 8                        | 9                        |                       |

## 10. Patientensicherheit

Die Behandlung wird so gestaltet, dass Ihr Risiko für negative Folgen und Fehler in der Behandlung möglichst gering ist.

Beispiele hierfür sind:

- Sauberkeit der Einrichtungen und der medizinischen Instrumente
- Aktuelle wissenschaftliche Ergebnisse werden bei der Behandlung berücksichtigt
- Wechselwirkungen zwischen verschiedenen Medikamenten werden beachtet
- Gründliche Aufzeichnung des Behandlungsverlaufs

a) Finden Sie, dass die Beschreibung mit den Veränderungen besser oder schlechter ist?

|                      |                          |                          |                          |                          |                          |                          |                          |                          |                          |                  |
|----------------------|--------------------------|--------------------------|--------------------------|--------------------------|--------------------------|--------------------------|--------------------------|--------------------------|--------------------------|------------------|
| Sehr viel schlechter | <input type="checkbox"/> | Sehr viel besser |
|                      | 1                        | 2                        | 3                        | 4                        | 5                        | 6                        | 7                        | 8                        | 9                        |                  |

Bewertung der Wichtigkeit durch alle Teilnehmenden im Mittel: **X**

Ihre persönliche Bewertung der Wichtigkeit: **X**

b) Wie wichtig finden Sie diesen Bestandteil?

|                         |                          |                          |                          |                          |                          |                          |                          |                          |                          |                 |
|-------------------------|--------------------------|--------------------------|--------------------------|--------------------------|--------------------------|--------------------------|--------------------------|--------------------------|--------------------------|-----------------|
| Überhaupt nicht wichtig | <input type="checkbox"/> | Äußerst wichtig |
|                         | 1                        | 2                        | 3                        | 4                        | 5                        | 6                        | 7                        | 8                        | 9                        |                 |

Bewertung der Umsetzung durch alle Teilnehmenden im Mittel: **X**

Ihre persönliche Bewertung der Umsetzung: **X**

c) Wie gut ist dieser Bestandteil Ihrer Erfahrung nach derzeit in Deutschland umgesetzt?

|                           |                          |                          |                          |                          |                          |                          |                          |                          |                          |                       |
|---------------------------|--------------------------|--------------------------|--------------------------|--------------------------|--------------------------|--------------------------|--------------------------|--------------------------|--------------------------|-----------------------|
| Überhaupt nicht umgesetzt | <input type="checkbox"/> | Vollständig umgesetzt |
|                           | 1                        | 2                        | 3                        | 4                        | 5                        | 6                        | 7                        | 8                        | 9                        |                       |

### III. Konkrete Handlungen und Maßnahmen

#### 11. Persönlich angepasste Informationen

Die Behandler/innen geben Ihnen Informationen über Ihre Vorsorge, Erkrankung und die Behandlungsmöglichkeiten **und deren mögliche Kosten in Form von Zuzahlungen**. Diese Informationen sind angepasst an Ihre persönlichen Wünsche und Bedürfnisse. Sie werden ermutigt, Ihr eigenes Wissen mit den Behandler/innen zu teilen. **Wenn Sie Medikamente verschrieben bekommen, erhalten Sie eine schriftliche Übersicht über die Einnahme und die möglichen Nebenwirkungen (Medikamentenplan).**

a) Finden Sie, dass die Beschreibung mit den Veränderungen besser oder schlechter ist?

|                      |                          |                          |                          |                          |                          |                          |                          |                          |                          |                  |
|----------------------|--------------------------|--------------------------|--------------------------|--------------------------|--------------------------|--------------------------|--------------------------|--------------------------|--------------------------|------------------|
| Sehr viel schlechter | <input type="checkbox"/> | Sehr viel besser |
|                      | 1                        | 2                        | 3                        | 4                        | 5                        | 6                        | 7                        | 8                        | 9                        |                  |

Bewertung der Wichtigkeit durch alle Teilnehmenden im Mittel: **X**

Ihre persönliche Bewertung der Wichtigkeit: **X**

b) Wie wichtig finden Sie diesen Bestandteil?

|                         |                          |                          |                          |                          |                          |                          |                          |                          |                          |                 |
|-------------------------|--------------------------|--------------------------|--------------------------|--------------------------|--------------------------|--------------------------|--------------------------|--------------------------|--------------------------|-----------------|
| Überhaupt nicht wichtig | <input type="checkbox"/> | Äußerst wichtig |
|                         | 1                        | 2                        | 3                        | 4                        | 5                        | 6                        | 7                        | 8                        | 9                        |                 |

Bewertung der Umsetzung durch alle Teilnehmenden im Mittel: **X**

Ihre persönliche Bewertung der Umsetzung: **X**

c) Wie gut ist dieser Bestandteil Ihrer Erfahrung nach derzeit in Deutschland umgesetzt?

|                           |                          |                          |                          |                          |                          |                          |                          |                          |                          |                       |
|---------------------------|--------------------------|--------------------------|--------------------------|--------------------------|--------------------------|--------------------------|--------------------------|--------------------------|--------------------------|-----------------------|
| Überhaupt nicht umgesetzt | <input type="checkbox"/> | Vollständig umgesetzt |
|                           | 1                        | 2                        | 3                        | 4                        | 5                        | 6                        | 7                        | 8                        | 9                        |                       |

#### 12. Gleichberechtigte Zusammenarbeit und Beteiligung bei Entscheidungen

Es wird eine gleichberechtigte Zusammenarbeit zwischen Ihnen und den Behandler/innen angestrebt. Entscheidungen zur Behandlung werden gemeinsam getroffen, falls Sie sich das wünschen. Dabei bringen Sie aktiv Ihre eigene Sicht, Wünsche und Ziele mit ein.

Bewertung der Wichtigkeit durch alle Teilnehmenden im Mittel: **X**

Ihre persönliche Bewertung der Wichtigkeit: **X**

a) Wie wichtig finden Sie diesen Bestandteil?

|                         |                          |                          |                          |                          |                          |                          |                          |                          |                          |                 |
|-------------------------|--------------------------|--------------------------|--------------------------|--------------------------|--------------------------|--------------------------|--------------------------|--------------------------|--------------------------|-----------------|
| Überhaupt nicht wichtig | <input type="checkbox"/> | Äußerst wichtig |
|                         | 1                        | 2                        | 3                        | 4                        | 5                        | 6                        | 7                        | 8                        | 9                        |                 |

Bewertung der Umsetzung durch alle Teilnehmenden im Mittel: **X**

Ihre persönliche Bewertung der Umsetzung: **X**

b) Wie gut ist dieser Bestandteil Ihrer Erfahrung nach derzeit in Deutschland umgesetzt?

|                           |                          |                          |                          |                          |                          |                          |                          |                          |                          |                       |
|---------------------------|--------------------------|--------------------------|--------------------------|--------------------------|--------------------------|--------------------------|--------------------------|--------------------------|--------------------------|-----------------------|
| Überhaupt nicht umgesetzt | <input type="checkbox"/> | Vollständig umgesetzt |
|                           | 1                        | 2                        | 3                        | 4                        | 5                        | 6                        | 7                        | 8                        | 9                        |                       |

### 13. Beteiligung von Familie und Freunden

Ihre Familienmitglieder und Freunde werden in dem Maß in die Behandlung einbezogen, wie Sie es sich wünschen.

Beispiele dafür sind:

- Familie und Freunde bekommen Informationen
- Familie und Freunde nehmen an Gesprächen teil
- Familie und Freunde unterstützen aktiv die Behandlung im Alltag (z.B. beim Einnehmen von Medikamenten oder Hinbringen zur Behandlung)

Bewertung der Wichtigkeit durch alle Teilnehmenden im Mittel: X

Ihre persönliche Bewertung der Wichtigkeit: X

a) Wie wichtig finden Sie diesen Bestandteil?

|               |                          |                          |                          |                          |                          |                          |                          |                          |                          |         |
|---------------|--------------------------|--------------------------|--------------------------|--------------------------|--------------------------|--------------------------|--------------------------|--------------------------|--------------------------|---------|
| Überhaupt     | <input type="checkbox"/> | Äußerst |
| nicht wichtig | 1                        | 2                        | 3                        | 4                        | 5                        | 6                        | 7                        | 8                        | 9                        | wichtig |

Bewertung der Umsetzung durch alle Teilnehmenden im Mittel: X

Ihre persönliche Bewertung der Umsetzung: X

b) Wie gut ist dieser Bestandteil Ihrer Erfahrung nach derzeit in Deutschland umgesetzt?

|                 |                          |                          |                          |                          |                          |                          |                          |                          |                          |             |
|-----------------|--------------------------|--------------------------|--------------------------|--------------------------|--------------------------|--------------------------|--------------------------|--------------------------|--------------------------|-------------|
| Überhaupt       | <input type="checkbox"/> | Vollständig |
| nicht umgesetzt | 1                        | 2                        | 3                        | 4                        | 5                        | 6                        | 7                        | 8                        | 9                        | umgesetzt   |

### 14. Aktivierung der Patientinnen und Patienten

Die Behandler/innen bestärken Sie darin, aktiv und selbstständig mit Ihrer Erkrankung und der Behandlung umzugehen. Dadurch werden Sie zu Experten Ihrer eigenen Erkrankung.

Beispiele dafür sind:

- Im Alltag gut mit den Anforderungen der Erkrankung umgehen
- Aktiv am Gespräch mit Behandler/innen teilnehmen
- Zurechtfinden im Gesundheitswesen
- Möglichkeiten zur Verbesserung der eigenen Situation suchen (z.B. mehr Sport treiben oder ein neues Hobby für sich finden)

a) Finden Sie, dass die Beschreibung mit den Veränderungen besser oder schlechter ist?

|            |                          |                          |                          |                          |                          |                          |                          |                          |                          |           |
|------------|--------------------------|--------------------------|--------------------------|--------------------------|--------------------------|--------------------------|--------------------------|--------------------------|--------------------------|-----------|
| Sehr viel  | <input type="checkbox"/> | Sehr viel |
| schlechter | 1                        | 2                        | 3                        | 4                        | 5                        | 6                        | 7                        | 8                        | 9                        | besser    |

Bewertung der Wichtigkeit durch alle Teilnehmenden im Mittel: X

Ihre persönliche Bewertung der Wichtigkeit: X

b) Wie wichtig finden Sie diesen Bestandteil?

|               |                          |                          |                          |                          |                          |                          |                          |                          |                          |         |
|---------------|--------------------------|--------------------------|--------------------------|--------------------------|--------------------------|--------------------------|--------------------------|--------------------------|--------------------------|---------|
| Überhaupt     | <input type="checkbox"/> | Äußerst |
| nicht wichtig | 1                        | 2                        | 3                        | 4                        | 5                        | 6                        | 7                        | 8                        | 9                        | wichtig |

Bewertung der Umsetzung durch alle Teilnehmenden im Mittel: X

Ihre persönliche Bewertung der Umsetzung: X

c) Wie gut ist dieser Bestandteil Ihrer Erfahrung nach derzeit in Deutschland umgesetzt?

|                 |                          |                          |                          |                          |                          |                          |                          |                          |                          |             |
|-----------------|--------------------------|--------------------------|--------------------------|--------------------------|--------------------------|--------------------------|--------------------------|--------------------------|--------------------------|-------------|
| Überhaupt       | <input type="checkbox"/> | Vollständig |
| nicht umgesetzt | 1                        | 2                        | 3                        | 4                        | 5                        | 6                        | 7                        | 8                        | 9                        | umgesetzt   |

## 15. Unterstützung des körperlichen Wohlbefindens

Die Behandler/innen kümmern sich um Ihr körperliches Wohlbefinden.

Beispiele dafür sind:

- Behandlung von Schmerzen
- Gesunde Ernährung
- Unterstützung im Alltag (z.B. durch die Verordnung von Gehhilfen **und durch Übungen, diese im Alltag richtig zu benutzen**)

a) Finden Sie, dass die Beschreibung mit den Veränderungen besser oder schlechter ist?

|                      |                          |                          |                          |                          |                          |                          |                          |                          |                          |                  |
|----------------------|--------------------------|--------------------------|--------------------------|--------------------------|--------------------------|--------------------------|--------------------------|--------------------------|--------------------------|------------------|
| Sehr viel schlechter | <input type="checkbox"/> | Sehr viel besser |
|                      | 1                        | 2                        | 3                        | 4                        | 5                        | 6                        | 7                        | 8                        | 9                        |                  |

Bewertung der Wichtigkeit durch alle Teilnehmenden im Mittel: **X**

Ihre persönliche Bewertung der Wichtigkeit: **X**

b) Wie wichtig finden Sie diesen Bestandteil?

|                         |                          |                          |                          |                          |                          |                          |                          |                          |                          |                 |
|-------------------------|--------------------------|--------------------------|--------------------------|--------------------------|--------------------------|--------------------------|--------------------------|--------------------------|--------------------------|-----------------|
| Überhaupt nicht wichtig | <input type="checkbox"/> | Äußerst wichtig |
|                         | 1                        | 2                        | 3                        | 4                        | 5                        | 6                        | 7                        | 8                        | 9                        |                 |

Bewertung der Umsetzung durch alle Teilnehmenden im Mittel: **X**

Ihre persönliche Bewertung der Umsetzung: **X**

c) Wie gut ist dieser Bestandteil Ihrer Erfahrung nach derzeit in Deutschland umgesetzt?

|                           |                          |                          |                          |                          |                          |                          |                          |                          |                          |                       |
|---------------------------|--------------------------|--------------------------|--------------------------|--------------------------|--------------------------|--------------------------|--------------------------|--------------------------|--------------------------|-----------------------|
| Überhaupt nicht umgesetzt | <input type="checkbox"/> | Vollständig umgesetzt |
|                           | 1                        | 2                        | 3                        | 4                        | 5                        | 6                        | 7                        | 8                        | 9                        |                       |

## 16. Unterstützung des psychischen Wohlbefindens

Die Behandler/innen gehen auf Ihre Gefühlslage und Ihr psychisches Befinden ein.

Beispiele dafür sind:

- Ansprechen von Sorgen und Ängsten
- Angebot psychologischer Unterstützung

Bewertung der Wichtigkeit durch alle Teilnehmenden im Mittel: **X**

Ihre persönliche Bewertung der Wichtigkeit: **X**

a) Wie wichtig finden Sie diesen Bestandteil?

|                         |                          |                          |                          |                          |                          |                          |                          |                          |                          |                 |
|-------------------------|--------------------------|--------------------------|--------------------------|--------------------------|--------------------------|--------------------------|--------------------------|--------------------------|--------------------------|-----------------|
| Überhaupt nicht wichtig | <input type="checkbox"/> | Äußerst wichtig |
|                         | 1                        | 2                        | 3                        | 4                        | 5                        | 6                        | 7                        | 8                        | 9                        |                 |

Bewertung der Umsetzung durch alle Teilnehmenden im Mittel: **X**

Ihre persönliche Bewertung der Umsetzung: **X**

b) Wie gut ist dieser Bestandteil Ihrer Erfahrung nach derzeit in Deutschland umgesetzt?

|                           |                          |                          |                          |                          |                          |                          |                          |                          |                          |                       |
|---------------------------|--------------------------|--------------------------|--------------------------|--------------------------|--------------------------|--------------------------|--------------------------|--------------------------|--------------------------|-----------------------|
| Überhaupt nicht umgesetzt | <input type="checkbox"/> | Vollständig umgesetzt |
|                           | 1                        | 2                        | 3                        | 4                        | 5                        | 6                        | 7                        | 8                        | 9                        |                       |

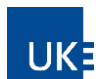

1  
2  
3  
4  
5  
6  
7  
8  
9  
10  
11  
12  
13  
14  
15  
16  
17  
18  
19  
20  
21  
22  
23  
24  
25  
26  
27  
28  
29  
30  
31  
32  
33  
34  
35  
36  
37  
38  
39  
40  
41  
42  
43  
44  
45  
46  
47  
48  
49  
50  
51  
52  
53  
54  
55  
56  
57  
58  
59  
60

Sie haben nun unsere Beschreibung zur Patientenorientierung gelesen und bewertet.

Wenn Sie finden, dass Bestandteile in unserer Beschreibung immer noch fehlen, können Sie diese hier benennen:

---

---

---

---

---

---

---

---

Haben Sie noch weitere Anmerkungen zu der Beschreibung (z.B. Verständlichkeit)?

---

---

---

---

---

---

---

---

Vielen Dank für das Ausfüllen des Fragebogens. Sie haben uns damit sehr geholfen und einen Beitrag für die Verbesserung der Versorgung geleistet!

**S1: Overview of diseases indicated by patients (online supplement)**

| <i>Name of disease</i>                            | <i>Frequency</i> |
|---------------------------------------------------|------------------|
| Addiction disorder                                | 2                |
| Allergies                                         | 1                |
| Ametropia                                         | 1                |
| Anemia                                            | 1                |
| Asthma                                            | 3                |
| Back pain                                         | 1                |
| Cataract                                          | 1                |
| Cholesterol disorder                              | 4                |
| Chronic inflammatory demyelinating polyneuropathy | 3                |
| Chronic obstipation                               | 1                |
| Chronic obstructive pulmonary disease (COPD)      | 1                |
| Chronic pain                                      | 1                |
| Diabetes                                          | 12               |
| Disorder of cardiac valves                        | 1                |
| Disorder of carotids                              | 1                |
| Disorder of cervical spine                        | 1                |
| Disorder of conjunctive tissue                    | 1                |
| Disorder of feet                                  | 1                |
| Disorder of lungs                                 | 1                |
| Disorder of stomach                               | 1                |
| Endometriosis                                     | 2                |
| Essential tremor                                  | 1                |
| Eyelids disorder                                  | 1                |
| Eyes damaged by hypertension                      | 1                |
| Focal dystopia                                    | 1                |
| Food allergy                                      | 1                |
| Gastroesophageal reflux disease                   | 1                |
| Glaucoma                                          | 1                |
| Hardness of hearing                               | 2                |
| Hashimoto's thyroiditis                           | 2                |
| Heart attack                                      | 1                |



|    |                                      |   |
|----|--------------------------------------|---|
| 1  |                                      |   |
| 2  |                                      |   |
| 3  | Heartburn                            | 1 |
| 4  |                                      |   |
| 5  | HIV infection                        | 1 |
| 6  |                                      |   |
| 7  | Hypercalciuria                       | 1 |
| 8  |                                      |   |
| 9  | Hyperuricemia                        | 1 |
| 10 |                                      |   |
| 11 | Hypothyroidism                       | 4 |
| 12 |                                      |   |
| 13 | Incontinence                         | 1 |
| 14 |                                      |   |
| 15 | Inflammation of pancreas             | 1 |
| 16 |                                      |   |
| 17 | Intestinal surgery (removal of 10cm) | 1 |
| 18 |                                      |   |
| 19 | Irritable bowel syndrome             | 1 |
| 20 |                                      |   |
| 21 | Kidney insufficiency                 | 1 |
| 22 |                                      |   |
| 23 | Migraine                             | 2 |
| 24 |                                      |   |
| 25 | Multiple sclerosis                   | 1 |
| 26 |                                      |   |
| 27 | Neural pain                          | 1 |
| 28 |                                      |   |
| 29 | Neurodermatitis                      | 1 |
| 30 |                                      |   |
| 31 | Obesity                              | 2 |
| 32 |                                      |   |
| 33 | Polycystic ovary syndrome            | 1 |
| 34 |                                      |   |
| 35 | Potassium deficiency                 | 1 |
| 36 |                                      |   |
| 37 | Schwannoma                           | 1 |
| 38 |                                      |   |
| 39 | Scleroderma                          | 1 |
| 40 |                                      |   |
| 41 | Sjögren syndrome                     | 1 |
| 42 |                                      |   |
| 43 | Skin disorder                        | 1 |
| 44 |                                      |   |
| 45 | Sleep apnea                          | 5 |
| 46 |                                      |   |
| 47 | Sleep disorder                       | 2 |
| 48 |                                      |   |
| 49 | Snoring                              | 1 |
| 50 |                                      |   |
| 51 | Somatization disorder                | 1 |
| 52 |                                      |   |
| 53 | Somnambulism                         | 1 |
| 54 |                                      |   |
| 55 | Struma multinodosa                   | 1 |
| 56 |                                      |   |
| 57 | Strumectomy                          | 1 |
| 58 |                                      |   |
| 59 | Swaying/Pendulation                  | 1 |
| 60 |                                      |   |
|    | Takotsubo cardiomyopathy             | 1 |
|    |                                      |   |
|    | Thrombosis                           | 2 |
|    |                                      |   |
|    | Thyroiditis                          | 1 |
|    |                                      |   |
|    | Trichotillomania                     | 1 |
|    |                                      |   |
|    | Vitamin D deficiency                 | 1 |

# BMJ Open

## Assessing the relevance and implementation of patient-centeredness from the patients' perspective in Germany: Results of a Delphi study

|                                 |                                                                                                                                                                                                                                                                                                                                                                                                                                           |
|---------------------------------|-------------------------------------------------------------------------------------------------------------------------------------------------------------------------------------------------------------------------------------------------------------------------------------------------------------------------------------------------------------------------------------------------------------------------------------------|
| Journal:                        | <i>BMJ Open</i>                                                                                                                                                                                                                                                                                                                                                                                                                           |
| Manuscript ID                   | bmjopen-2019-031741.R2                                                                                                                                                                                                                                                                                                                                                                                                                    |
| Article Type:                   | Original research                                                                                                                                                                                                                                                                                                                                                                                                                         |
| Date Submitted by the Author:   | 13-Nov-2019                                                                                                                                                                                                                                                                                                                                                                                                                               |
| Complete List of Authors:       | Zeh, Stefan; Universitätsklinikum Hamburg-Eppendorf, Department of Psychosocial Medicine<br>Christalle, Eva; Universitätsklinikum Hamburg Eppendorf Zentrum für Psychosoziale Medizin, Department of Medical Psychology;<br>Hahlweg, Pola; Universitätsklinikum Hamburg-Eppendorf, Department of Medical Psychology<br>Härter, Martin; Universitätsklinikum Hamburg-Eppendorf<br>Scholl, Isabelle; Universitätsklinikum Hamburg-Eppendorf |
| <b>Primary Subject Heading</b>: | Health services research                                                                                                                                                                                                                                                                                                                                                                                                                  |
| Secondary Subject Heading:      | Health policy, Patient-centred medicine                                                                                                                                                                                                                                                                                                                                                                                                   |
| Keywords:                       | patient-centeredness, chronic diseases, health care delivery, Delphi study, patient perspective                                                                                                                                                                                                                                                                                                                                           |
|                                 |                                                                                                                                                                                                                                                                                                                                                                                                                                           |

SCHOLARONE™  
Manuscripts

1  
2  
3 **Assessing the relevance and implementation of patient-centeredness from the patients'**  
4 **perspective in Germany: Results of a Delphi study**  
5  
6  
7

8 Stefan Zeh<sup>1</sup>, Eva Christalle<sup>1</sup>, Pola Hahlweg<sup>1</sup>, Martin Härter<sup>1</sup>, Isabelle Scholl<sup>1</sup>  
9

10  
11 <sup>1</sup>Department of Medical Psychology, University Medical Center Hamburg-Eppendorf,  
12 Martinistraße 52, D-20246 Hamburg, Germany  
13  
14

15  
16 Email addresses:  
17

18 Stefan Zeh, M.Sc.: [s.zeh@uke.de](mailto:s.zeh@uke.de)  
19  
20 Eva Christalle, M.Sc.: [e.christalle@uke.de](mailto:e.christalle@uke.de)  
21  
22 Pola Hahlweg, Dipl.-Psych.: [p.hahlweg@uke.de](mailto:p.hahlweg@uke.de)  
23  
24 Prof. Dr. Dr. Martin Härter, Dipl.-Psych.: [m.haerter@uke.de](mailto:m.haerter@uke.de)  
25  
26 Dr. Isabelle Scholl, Dipl.-Psych.: [i.scholl@uke.de](mailto:i.scholl@uke.de)  
27  
28  
29

30 Corresponding author:  
31

32 Stefan Zeh, M.Sc.  
33 University Medical Center Hamburg-Eppendorf  
34 Department of Medical Psychology  
35 Martinistr. 52  
36  
37 20246 Hamburg, Germany  
38  
39 Email: [s.zeh@uke.de](mailto:s.zeh@uke.de)  
40  
41 Phone: +49-(0)40-7410-52001  
42  
43  
44  
45  
46

47 Word count for the abstract: 278 (max. 300)

48 Word count for the manuscript: XXX (max. 4000)

49 Count for figures/tables: 5 (2 figures, 3 tables) (max. 5)

50 Count of online supplements: 1 table

51  
52  
53 Count for references: 32  
54  
55  
56  
57  
58  
59  
60

## 1 ABSTRACT

### 2 Objective

3 Patient-centeredness (PC) has particularly grown in relevance in health services research as well as in  
4 politics and there has been much research on its conceptualization. However, conceptual work  
5 neglected the patients' perspective. Thus, it remains unclear which dimensions of PC matter most to  
6 patients. This study aims to assess relevance and current degree of implementation of PC from the  
7 perspective of chronically ill patients in Germany.

### 8 Methods

9 We conducted a Delphi study. Patients were recruited throughout Germany using community-based  
10 strategies (e.g. newspapers and support groups). In round one, patients rated relevance and  
11 implementation of 15 dimensions of PC anonymously. In round two, patients received results of  
12 round one and were asked to re-rate their own results. Participants had to have at least one of the  
13 following chronic diseases: cancer, cardiovascular disease, mental disorder, or musculoskeletal  
14 disorder. Furthermore, patients had to be at least 18 years old and had to give informed consent  
15 prior to participation.

### 16 Results

17 226 patients participated in round one, 214 patients in round two. In both rounds, all 15 dimensions  
18 were rated highly relevant, but currently insufficiently implemented. Most relevant dimensions  
19 included "patient safety", "access to care" and "patient information". Due to small sizes of sub-  
20 samples between chronic disease groups, differences could not be computed. For the other  
21 subgroups (e.g. single disease vs. multi-morbidity), there were no major differences.

### 22 Conclusion

23 This is one of the first studies assessing patient-centeredness from patients' perspective in Germany.  
24 We showed that patients consider every dimension of PC relevant, but currently not well  
25 implemented. Our results can be used to foster patient-centered health care delivery and to develop  
26 patient-reported experience measures to assess patient-centeredness of health care in Germany.

27  
28 **Keywords:** patient-centeredness; chronic diseases; health care delivery; Delphi study; patient perspective

### 29 30 Strengths and limitations of this study:

- 31 - No rating of dimensions of patient-centeredness (PC) from the patients' perspective available yet
- 32 - Extensive inclusion of patients' perspectives within the Delphi study
- 33 - No restriction to a specific regional area through nation-wide community-based strategies
- 34 - Possibility for participants to give written feedback in order to enhance quality of given answers
- 35 - Limitation to only four chronic disease groups

## 36 INTRODUCTION

37  
38 Over the last years, the concept of patient-centeredness (PC) has been widely discussed. More and  
39 more, the terms person-centeredness [1,2] and people-centeredness [3] also appear in the literature,  
40 either being used synonymously to patient-centeredness or converging around central ideas. Its  
41 relevance in politics, research and health care practice has been growing constantly [4–6]. In  
42 Germany, the Law on Patients' Rights [5] mandates certain aspects of patient-centered care, like the  
43 right for comprehensible and comprehensive patient information. However, there is no national  
44 recommendation for the implementation of patient-centered care in Germany yet. Many studies  
45 showed a positive association of PC with relevant outcomes like patient satisfaction, well-being and  
46 adherence [7], which are especially relevant in chronic disease management. Nevertheless, there has  
47 been a lack of conceptual clarity regarding the use of the term of PC [8–13]. Scholl and colleagues  
48 [12] closed this gap by developing an integrative generic model derived from literature extracting 15  
49 dimensions of PC (see figure 1). This model was validated by assessing the views of different health  
50 care stakeholders on its relevance and clarity [14]. Although some representatives of patient  
51 organizations participated in this assessment, the perspective of the recipients of patient-centered  
52 care, the patients themselves, was underrepresented. In summary, without the patients' perspective,  
53 the conceptualization of PC is still missing its most crucial aspect: the assessment and evaluation of  
54 PC in health care from the view of patients [15–17].

56 [Insert Figure 1 here]

57 **Figure 1 Integrative model of patient-centeredness (Scholl et al., 2014)**

58  
59 There are only few international studies investigating the patients' assessment of PC [18,19], without  
60 any published studies from Germany. Thus, we don't know what patients consider relevant about PC,  
61 nor how patients view the current degree of implementation of PC in the German health care  
62 system. It is a system in which, health care coverage is universal, mandatory and offers extensive  
63 services. Government delegates decision-making powers to self-regulated organizations of payers  
64 and providers. While outpatient care is mainly delivered in one- or two-physician practices on a fee-  
65 for-service payment model, hospitals mainly deliver inpatient care on case-based payment model  
66 [20,21]. Yet, in order to foster PC in Germany, it is crucial to know what aspects of PC are relevant to  
67 patients and how well these aspects are already implemented, as it allows prioritizing aspects  
68 especially relevant or not yet implemented.  
69 Therefore, this study aims to close this gap by assessing relevance and current degree of  
70 implementation of different dimensions of PC from the patients' perspective in Germany. Assessing

1  
2  
3 71 relevance and current degree of implementation of different aspects of PC can therefore be seen as  
4 72 the first steps in achieving a more patient-centered health care.  
5  
6 73 This Delphi study was conducted as part of the study “Assessment of patient-centeredness through  
7  
8 74 patient-reported experience measures (ASPIRED)” [22]. Within the study ASPIRED, a patient-reported  
9  
10 75 experience measure will be developed to foster patient-centered care.  
11  
12 76

## 13 77 **METHODS**

### 14 78 **Study design**

15 79 We used a Delphi study, comparable to the expert validation study mentioned before [14]. A Delphi  
16 80 study consists of several rounds. In each round after the first, participants get their own ratings as  
17 81 well as the median ratings of all participants in the previous round. This procedure generates the  
18 82 possibility for participants to share their opinion from different regional locations without the threat  
19 83 of some participants dominating the discussion [23]. It aims to reach high group consensus through a  
20 84 structured and anonymous group discussion [24]. Like Zill and colleagues [14] or van Rijssen and  
21 85 colleagues [25], we planned to perform two rounds prior to conducting the first round. However, if  
22 86 we had seen major discrepancies after two rounds, we would have performed another round, if  
23 87 necessary.  
24  
25  
26  
27  
28  
29  
30  
31  
32

### 33 89 **Preparation of the Delphi study – adaptation of the model of patient-centeredness using** 34 90 **cognitive interviews**

35 91 We based our Delphi study on the integrative model of PC [12,14]. In a first step, the scientific model  
36 92 was adapted into a version comprehensible to patients (first version). Adaptation was done by group  
37 93 discussions in our research team (SZ, EC, PH, IS) in nine rounds. To make sentences easy to  
38 94 understand, we used dictionaries and recommendations on adaptation of wording and grammar  
39 95 [26]. We then tested comprehensibility of the new version through cognitive interviews with  
40 96 patients. We recruited ten patients through several community-based strategies (see below) in order  
41 97 to get a heterogeneous sample regarding demographic variables (e.g. age, first language, educational  
42 98 level). Participants had to have at least one of the following chronic diseases: cancer, cardiovascular  
43 99 disease, mental disorder, or musculoskeletal disorder. In cognitive interviews, we handed out the  
44 100 first adapted version described above. Participants were asked to read each dimension step by step  
45 101 and explain in their own words how they understood the description. All interviews were audio-  
46 102 recorded, transcribed, and analyzed independently by two researchers (SZ, EC). According to the  
47 103 results, the model was revised (second version) in subsequent group discussions (SZ, EC, IS, PH).  
48  
49  
50  
51  
52  
53  
54  
55  
56  
57  
58  
59  
60

### 106 **Delphi study**

107 Participants received the adapted integrative model of PC (second version) and were asked to rate  
108 relevance and current implementation from their perspective. For both aspects, a nine-point Likert  
109 scale (1 = *not relevant/not well implemented*; 9 = *very relevant/well implemented*) was given. In  
110 addition, we asked an open-ended question about whether any relevant aspects were missing in the  
111 model and whether they had any further comments (e.g. regarding comprehensibility of  
112 descriptions). Based on answers to those open-ended questions, we adapted the model again (third  
113 version). In the second round of the Delphi study, patients received their own ratings from the first  
114 round again. Furthermore, we gave them the median rating of other participants in comparison.  
115 Following, we then asked participants to repeat their rating. For all dimensions with adapted  
116 descriptions, participants were also asked to rate whether the description worsened or improved  
117 with the adaptation (from 1 = *much worse* to 9 = *much better*).  
118 For both rounds, participants could choose whether they wanted to participate online or via mail.  
119 Both versions were identical in terms of response format (see Appendix A1 for the mail-based  
120 version with adaptations (highlighted) made after round 1). For the online version, we used  
121 LimeSurvey [27]. The study was conducted from June 2018 to August 2018. For each round,  
122 participants had three weeks to reply and there were four weeks between the two rounds. After  
123 completion of both rounds, participants received a compensation of 25€. Conducting the Delphi  
124 study as well as reporting of methods and results were based on the recommendations of Hasson  
125 and colleagues [24] as well as of Jünger and colleagues [28].

### 126 **Study population and recruitment**

127 We aimed to include 200 patients in the study. We expected a drop-out rate of 15% between round  
128 1 and 2. Thus, we aimed to include 240 in the first round. We recruited patients through different  
129 community-based strategies: a) Notices in local stores in Hamburg, b) dissemination through national  
130 and regional patient organizations and networks, c) Facebook groups of different towns, and d) two  
131 national newspapers (ZEIT and Bild). Participants could reach out to SZ and EC with the contact  
132 information provided on the notices and in emails. Since no member of the research team had direct  
133 contact with participants, the possibility of having influenced the participants' judgements was  
134 reduced. Participants were included if they gave their informed consent by signing the informed  
135 consent letter (mail version) or by choosing „yes“ in a dropdown menu after a question whether they  
136 consent (online version) , were 18 years or older and if they reported at least one disease from one  
137 of the aforementioned chronic disease groups. In Figure 2, an overview illustrates the procedure.

138  
139 [Please insert Figure 2 around here]  
140

## 141 **Patient and Public Involvement**

142 Patients were not involved in the development of the research questions. However, during the  
143 development of the research proposal and prior to submission to the funding agency, we obtained  
144 collaboration agreements with several federal and regional patient organizations in order to secure  
145 field access and feasibility. Patient organizations were approached for that purpose. All gave us  
146 positive feedback on the study aims, acknowledging that more research is needed on patients'  
147 experiences related to patient-centered care. Thus, patient organizations supported recruitment of  
148 study participants by disseminating advertisement for study participation. No individual patient was  
149 involved in recruitment and conduct of the study. All study participants and every interested person  
150 in the public have the possibility to read and download regular project updates and study results on  
151 the project website (<http://www.ham-net.de/de/projekte/projekt-aspired.html>).

152

## 153 **Data analyses**

154 For the ratings, median, mean and standard deviation were calculated for all participants using SPSS  
155 (Version 21) [29]. Demographic data were analyzed accordingly, except for nominal items where we  
156 calculated frequencies. Consensus was examined by calculating distributions of answers per tertile  
157 (1-3; 4-6; 7-9) in comparison to Zill et al. [14]. We compared different subgroups due to potential  
158 differences in using the health care system including age groups (18-30 (young); 31-65 (middle aged);  
159 over 65 (older)), way of participation (mail vs. online) and morbidity (single disease vs. multi-  
160 morbidity). Open answers were analyzed, summarized by two researchers and the student assistant  
161 (SZ, EC, TK), and reviewed in a group discussion (SZ, EC, IS).

162

## 163 **RESULTS**

### 164 **Adaptation of the integrative model into a comprehensible version**

165 Within cognitive interviews, each participant understood generally well the patient version of  
166 patient-centeredness (first version). Some participants wanted easier terms (e.g. treatment  
167 ("Behandlung") instead of health care ("Gesundheitsversorgung")). We tested two versions: version  
168 A wasn't directed towards patients ("*Patients* can contact *their* health care provider easily"), version  
169 B was directed towards patients ("*You* can contact *your* health care provider easily"). Nine out of ten  
170 participants preferred personal pronouns (version B); thus, we adapted accordingly.

171

### 172 **Delphi study**

#### 173 **Characteristics of patients from the Delphi study**

174 262 patients, who reacted to the community-based recruitment strategies, fulfilled the inclusion  
175 criteria and were invited to participate via letter or online in the first round of the Delphi study after



176 having expressed interest in study participation. In the first round, 226 patients participated  
 177 (response rate = 86.26%), and in the second round, 214 patients participated (final response rate =  
 178 81.7%). Thus, the final sample consisted of 214 patients (drop-out rates: from invitation to first  
 179 round: n = 36 (13.7%); from invitation to second round: n = 48 (18.3%); from first to second round: n  
 180 = 12 (5.3%)). Mean age was 52 years (normally distributed), and two thirds were female. Further  
 181 information on participants' demographic and clinical characteristics is displayed in Table 1 and in  
 182 Table S1 (online supplement).

183 **Table 1**

184 Demographic and clinical characteristics of participants of the first round (N = 226)

| Characteristic                                       | Frequency              |
|------------------------------------------------------|------------------------|
| Age (in years)                                       | M = 51.79 (SD = 16.46) |
| Sex                                                  |                        |
| <i>Female</i>                                        | 149 (65.9 %)           |
| <i>Male</i>                                          | 76 (33.6 %)            |
| First language                                       |                        |
| <i>German</i>                                        | 219 (96.9 %)           |
| <i>Other</i>                                         | 5 (2.2 %)              |
| Chronic disease group<br>(multiple answers possible) |                        |
| <i>Cancer</i>                                        | 36 (15.3 %)            |
| <i>Cardiovascular disease</i>                        | 90 (39.8 %)            |
| <i>Mental disorder</i>                               | 117 (51.8 %)           |
| <i>Musculoskeletal disorder</i>                      | 114 (50.4 %)           |
| <i>Others<sup>a</sup></i>                            | 149 (67.4 %)           |
| Residence                                            |                        |
| <i>Hamburg</i>                                       | 59 (26.1 %)            |
| <i>Baden-Wuerttemberg</i>                            | 13 (5.8%)              |
| <i>North-Rhine Westphalia</i>                        | 23 (10.2%)             |
| <i>Rhineland-Palatinate</i>                          | 3 (1.3%)               |
| <i>Saarland</i>                                      | 3 (1.3%)               |
| <i>Saxony</i>                                        | 13 (5.8%)              |
| <i>Saxony-Anhalt</i>                                 | 4 (1.8%)               |
| <i>Schleswig-Holstein</i>                            | 10 (4.4%)              |
| <i>Thuringia</i>                                     | 1 (0.4%)               |

|                                      |                      |
|--------------------------------------|----------------------|
| <b>Bavaria</b>                       | 22 (9.7%)            |
| <b>Berlin</b>                        | 14 (6.2%)            |
| <b>Brandenburg</b>                   | 11 (4.9%)            |
| <b>Bremen</b>                        | 4 (1.8%)             |
| <b>Hesse</b>                         | 14 (6.2%)            |
| <b>Mecklenburg-Western Pomerania</b> | 19 (8.4%)            |
| <b>Lower Saxony</b>                  | 13 (5.8%)            |
| Health status <sup>b</sup>           | M = 2.49 (SD = 0.77) |

Note: M = Mean. SD = Standard Deviation.

*a* = Additional to one of the four groups mentioned above. Other chronic diseases included for example diabetes (*n* = 12), sleep apnea (*n* = 5) and hypothyroidism (*n* = 4). Please see the online supplement S1 for a comprehensive overview of other diseases.

*b* = Health status was assessed with the item "How would you assess your health status in general?" ranging from 1 = excellent to 5 = bad.

### Results of round 1

In Table 2, results from the first round of the ratings of relevance and degree of current implementation are shown. Regarding ratings of relevance, 13 out of 15 dimensions showed the maximum median of 9. The dimensions "patient as a unique person", "clinician-patient relationship", "clinician-patient communication", "access to care" and "physical support" showed highest means (range from 8.46 to 8.31). Consensus was defined as the degree to which patients rated dimensions in agreement and was predefined as reached if it was higher than 50%. That means that consensus was reached when at least 50% of the patients rated dimensions to be very or not very relevant (tertile from 7 to 9 or 1 to 3, respectively). Every dimension showed consensus of > 50% for tertile seven to nine (i.e. majority of patients rated within the highest tertile). Regarding the current degree of implementation, 3 out of 15 dimensions showed a median of 6 ("clinician-patient relationship", "clinician-patient communication", and "physical support"). All other dimensions showed a median of 5. The dimensions with the highest means were the same as those with the highest medians. Regarding consensus, every dimension had a rating of > 50% for the tertile from four to six. In general, every dimension of round 1 was rated as very relevant and as insufficiently implemented. Furthermore, patients were united in their rating because of the high consensus.

**Table 2**

Results for the assessment of relevance and implementation from the first round

|                                                                     | Relevance |             | Implementation |             |
|---------------------------------------------------------------------|-----------|-------------|----------------|-------------|
|                                                                     | Median    | M (SD)      | Median         | M (SD)      |
| <b>1. Patient-centered characteristics of health care providers</b> | 9         | 8.46 (0.90) | 5              | 5.30 (1.44) |
| <b>2. Trustful relationship</b>                                     | 9         | 8.41 (0.94) | 6              | 5.61 (1.72) |
| <b>3. Uniqueness of each patient</b>                                | 9         | 8.31 (1.11) | 5              | 5.21 (1.74) |
| <b>4. Consideration of personal circumstances</b>                   | 9         | 8.15 (1.23) | 5              | 4.77 (1.86) |

|                                                                        |   |             |   |             |
|------------------------------------------------------------------------|---|-------------|---|-------------|
| 5. Appropriate communication                                           | 9 | 8.31 (0.97) | 6 | 5.56 (1.74) |
| 6. Integration of additional health care elements                      | 8 | 7.34 (1.81) | 5 | 4.56 (1.99) |
| 7. Teamwork of health care providers                                   | 9 | 8.29 (1.18) | 5 | 5.08 (1.90) |
| 8. Access to care                                                      | 9 | 8.31 (0.99) | 5 | 4.88 (2.08) |
| 9. Good planning of care                                               | 9 | 8.30 (1.04) | 5 | 5.25 (1.92) |
| 10. Personally tailored information                                    | 9 | 8.27 (1.12) | 5 | 5.10 (1.87) |
| 11. Collaboration as equal partners and involvement in decision making | 9 | 8.25 (1.11) | 5 | 5.15 (2.04) |
| 12. Involvement of family and friends                                  | 7 | 6.92 (2.16) | 5 | 4.91 (2.21) |
| 13. Empowerment of patients                                            | 9 | 8.20 (1.13) | 5 | 5.23 (1.97) |
| 14. Support of physical wellbeing                                      | 9 | 8.31 (0.98) | 6 | 5.58 (1.95) |
| 15. Support of mental wellbeing                                        | 9 | 8.12 (1.35) | 5 | 4.83 (1.98) |

209

210 Sixty participants responded to the open-ended questions. Comments referred to additional aspects,  
 211 including time issues within health care (e.g. “Neither nurses, nor doctors have enough time for the  
 212 patients”), financial aspects (“without additional costs for people living in poverty”) and medication  
 213 plans (“discussing medication plans is too fast” or “more information about side effects”). We revised  
 214 descriptions after the first round according to the most frequent comments (third version). German  
 215 descriptions of dimensions used in round 2, in which changes from the second to third version are  
 216 highlighted, are listed in the appendix A1.

217 A few patients stated that patient safety could be improved by better coordination of medication  
 218 plans. Furthermore, patient safety was already depicted as part of the dimension “physical support”  
 219 in the model [14]. Due to comments, we revised the model to add “patient safety” as a separate 16<sup>th</sup>  
 220 dimension.

221

### 222 Results of round 2

223 In round 2, most ratings were very similar to the first round and medians did not change (see table  
 224 3). The added dimension of patient safety was also considered relevant but currently insufficiently  
 225 implemented. The adaptations we made based on the feedback were rated as “better than before”  
 226 (all means over 7). This time, most relevant dimensions were “patient safety”, “teamwork and team  
 227 building”, “access to care”, “patient information”, and “essential characteristics of clinicians”.  
 228 “Clinician-patient communication”, “clinician-patient relationship”, and “physical support” again  
 229 reached the best ratings regarding implementation. Additionally, the newly added dimension  
 230 “patient safety” also reached equally high ratings.

231

232 **Table 3**

233 Results for the assessment of adaptation, relevance and implementation of the second round

| Adaptation (round one to round two) |   |    | Relevance |   |    | Implementation |   |    |
|-------------------------------------|---|----|-----------|---|----|----------------|---|----|
| Median                              | M | SD | Median    | M | SD | Median         | M | SD |

|                                                                               |   |      |      |   |      |      |   |      |      |
|-------------------------------------------------------------------------------|---|------|------|---|------|------|---|------|------|
| <b>1. Patient-centered characteristics of health care providers</b>           | - | -    | -    | 9 | 8,36 | 1,30 | 5 | 5,27 | 1,38 |
| <b>2. Trustful relationship</b>                                               | 8 | 7,64 | 1,59 | 9 | 8,18 | 1,34 | 6 | 5,47 | 1,44 |
| <b>3. Uniqueness of each patient</b>                                          | - | -    | -    | 9 | 8,30 | 1,24 | 5 | 5,17 | 1,50 |
| <b>4. Consideration of personal circumstances</b>                             | 8 | 7,14 | 1,80 | 9 | 8,07 | 1,36 | 5 | 4,83 | 1,61 |
| <b>5. Appropriate communication</b>                                           | - | -    | -    | 9 | 8,33 | 1,12 | 6 | 5,62 | 1,54 |
| <b>6. Integration of additional health care elements</b>                      | - | -    | -    | 8 | 7,46 | 1,67 | 5 | 4,61 | 1,81 |
| <b>7. Teamwork of health care providers</b>                                   | - | -    | -    | 9 | 8,45 | 1,04 | 5 | 5,08 | 1,75 |
| <b>8. Access to care</b>                                                      | 8 | 7,79 | 1,59 | 9 | 8,38 | 1,09 | 5 | 4,81 | 1,83 |
| <b>9. Good planning of care</b>                                               | 8 | 7,28 | 1,82 | 9 | 8,18 | 1,28 | 5 | 5,07 | 1,73 |
| <b>10. Patient safety</b>                                                     | - | -    | -    | 9 | 8,56 | 0,94 | 6 | 5,61 | 1,64 |
| <b>11. Personally tailored information</b>                                    | 8 | 7,86 | 1,43 | 9 | 8,37 | 1,02 | 5 | 5,03 | 1,82 |
| <b>12. Collaboration as equal partners and involvement in decision making</b> | - | -    | -    | 9 | 8,32 | 1,12 | 5 | 5,25 | 1,74 |
| <b>13. Involvement of family and friends</b>                                  | - | -    | -    | 7 | 6,85 | 2,01 | 5 | 4,92 | 1,91 |
| <b>14. Empowerment of patients</b>                                            | 8 | 7,59 | 1,41 | 9 | 8,15 | 1,23 | 5 | 5,21 | 1,77 |
| <b>15. Support of physical wellbeing</b>                                      | 8 | 7,40 | 1,74 | 9 | 8,18 | 1,26 | 6 | 5,55 | 1,71 |
| <b>16. Support of mental wellbeing</b>                                        | - | -    | -    | 9 | 8,25 | 1,33 | 5 | 4,87 | 1,85 |

234

### 235 Subgroup analyses

236 In every chronic disease group, distribution of patients participating via mail or online was similar  
 237 (approx. 45:55 ratio, respectively). There was no major age difference between mail- and online-  
 238 based participation (mean age (mail): 54.83 years (SD = 17.85), mean age (online): 49.35 years (SD =  
 239 14.88)). Due to small sizes of sub-samples (e.g. only 6 patients indicated to only have cancer),  
 240 differences in ratings depending on chronic disease groups could not be analyzed (i.e. via analysis of  
 241 variance). Neither multi-morbidity (at least two chronic disease groups indicated compared to only  
 242 one), nor type of participation (mail vs. online) did affect assessment of relevance and  
 243 implementation by patients. That is, there were no differences between means bigger than 1. The  
 244 only differences of means above 1 were found within different age groups. The implementation of  
 245 "access to care" was rated lower by young patients in comparison to older patients (M = 4.37 for  
 246 young vs. M = 5.38 for older patients). Implementation of "patient information" was also rated lower  
 247 by young patients (M = 4.70 for young vs. M = 5.71 for older patients).

248

### 249 DISCUSSION

250 In our study, we have assessed relevance and current degree of implementation of different  
 251 dimensions of PC in the German health care system from the patients' perspective. The findings  
 252 show that patients consider every dimension of PC very relevant but currently only mediocly  
 253 implemented. Furthermore, there were no evident factors influencing these results (e.g. way of  
 254 participation or multi-morbidity).

1  
2  
3 255 These results point out the relevance to ask patients when investigating PC. Comparing this  
4  
5 256 assessment with the experts' ratings of the same dimensions from the same model [14], differences  
6  
7 257 between expert and patient ratings become evident. For example, experts did not rate each  
8  
9 258 dimension as very relevant but patients did (e.g. involvement of family and friends which was less  
10  
11 259 relevant to experts but patients considered it relevant). This discrepancy is relevant for development  
12  
13 260 of strategies to foster implementation of PC in Germany. If only the experts' perspective is known,  
14  
15 261 implementation efforts might not match patient needs. Consequently, a more patient-centered care  
16  
17 262 can only be achieved by taking into account patients' perspectives.  
18  
19 263 Furthermore, the study reveals that, while patients in Germany find patient-centeredness extremely  
20  
21 264 relevant, they do not find it well implemented in the German health care system. Thus, interventions  
22  
23 265 to foster dimensions of patient-centeredness on the micro level of care (e.g. tools for clinicians and  
24  
25 266 patients) could be developed and evaluated in future research. Furthermore, the results can guide  
26  
27 267 the development of patient-reported experience measures. On the federal level, the results indicate  
28  
29 268 that the German health care system could benefit from stronger health policy directives in regard to  
30  
31 269 the delivery of patient-centered care.

### 270 **Strengths and limitations**

30 271 Major strengths of this study are the diverse sample from all over Germany and the possibility to  
31  
32 272 anonymously generate a group consensus by performing a Delphi study. By doing so, ratings of each  
33  
34 273 individual weren't affected by dominant people in group discussions, and therefore, are more likely  
35  
36 274 to be unbiased. Furthermore, another strength of this study are the response rates indicating little  
37  
38 275 drop out from round one to round two. This could be ascribed to the internal motivation of  
39  
40 276 participating patients wanting to ameliorate health care services in Germany. Another explanation  
41  
42 277 could be the financial compensation which they only received after having completed both rounds.  
43  
44 278 However, although the notices were spread out widely, a participation bias (i.e. only people with a  
45  
46 279 higher interest in the topic would contact us) could have occurred by this method of recruitment.  
47  
48 280 Furthermore, there was little variation within ratings of relevance of the dimensions of PC. This could  
49  
50 281 indicate a lack of specification in the descriptions. Patients might have been unable to differentiate  
51  
52 282 between sub-aspects of a single description. Thus, they might have rated the whole dimension as  
53  
54 283 relevant even if they considered only some parts relevant enough to give a high score. Therefore,  
55  
56 284 additional qualitative approaches (e.g. by conducting semi-structured interviews) could help to  
57  
58 285 enrich findings and further explain results by specifying relevant aspects instead of broad  
59  
60 286 dimensions. Additionally, as our study focused on adding the patient perspective to the concept of  
287  
288 patient-centered care, we based our study on the integrative model of patient-centeredness, which  
289  
290 integrates over 400 definitions and models published between 1969 and 2012 [12]. We did not take  
into account further conceptual work published since (e.g. the framework developed by Santana and

1  
2  
3 290 colleagues [30]) which can be considered a limitation of this study. Furthermore, it is unclear if the  
4  
5 291 results are generalizable to other countries. Since health care systems differ substantially between  
6  
7 292 countries (e.g. role of government, coverage, organization of the delivery system, lengths of stay)  
8  
9 293 [20,31] patients' perspective on PCC might also differ. Further research is needed to evaluate the  
10  
11 294 patients' perspective in other countries. Finally, another limitation of our study was the relatively low  
12  
13 295 level of co-production with patients. As patients are recipients of PCC, this study could have  
14  
15 296 benefitted from a higher level of patient participation (e.g. [32]).

### 297 **Future studies**

16  
17 298 Regarding future studies or specific recommendations, policy makers or other stakeholders,  
18  
19 299 interested in fostering patient-centered health care, should therefore not only focus on the ratings of  
20  
21 300 relevance of experts but consider the patients rating, too. In their opinion, every dimension of  
22  
23 301 patient-centeredness is relevant. These results should not be neglected. When implementing  
24  
25 302 patient-centered care, a wholesome perspective is therefore needed.

26 303

### 27 304 **Conclusions**

28  
29 305 In summary, our study provides the patients' perspective on PC by assessing relevance and current  
30  
31 306 degree of implementation and enriches therefore current conceptualizations of PC. We showed that  
32  
33 307 patients consider every dimension of PC relevant, but currently not well implemented. Furthermore,  
34  
35 308 these results can be used for developing comprehensive questionnaires like patient-reported  
36  
37 309 experience measures regarding patient-centered care. Regarding the status quo, especially in  
38  
39 310 Germany, we therefore still need to make efforts since patients don't receive the patient-centered  
40  
41 311 health care they consider so relevant. Thus, this data can be used to deduce health care policies  
42  
43 312 which tackle the insufficient implementation of patient-centeredness from the patients' perspective.

42 313

44 314

45 315

47 316

49 317

51 318

52 319

54 320

56 321

57 322

59 323

60 324

## 325 REFERENCES

- 326 1 Louw JM, Marcus TS, Hugo JFM. Patient- or person-centred practice in medicine? - A review of  
 327 concepts. *African J Prim Heal care Fam Med* 2017;**9**:e1–7. doi:10.4102/phcfm.v9i1.1455
- 328 2 Håkansson Eklund J, Holmström IK, Kumlin T, *et al.* "Same same or different?" A review of  
 329 reviews of person-centered and patient-centered care. *Patient Educ Couns* 2019;**102**:3–11.  
 330 doi:<https://doi.org/10.1016/j.pec.2018.08.029>
- 331 3 World Health Organization (WHO). WHO Framework on integrated people-centred health  
 332 services. <https://www.who.int/servicedeliverysafety/areas/people-centred-care/en/>
- 333 4 Härter M, Dirmaier J, Scholl I, *et al.* The long way of implementing patient-centered care and  
 334 shared decision making in Germany. *Z Evid Fortbild Qual Gesundheitswes* 2017;**123–124**:46–51.  
 335 doi:10.1016/j.zefq.2017.05.006
- 336 5 Bundesrat. *Gesetzesbeschluss des deutschen Bundestages. Gesetz zur Verbesserung der*  
 337 *Rechte von Patientinnen und Patienten (Patientenrechtegesetz)*. Retrieved from  
 338 [http://www.bmjv.de/SharedDocs/Downloads/DE/pdfs/Gesetze/Gesetz\\_zur\\_Verbesserung\\_de](http://www.bmjv.de/SharedDocs/Downloads/DE/pdfs/Gesetze/Gesetz_zur_Verbesserung_der_Rechte_von_Patientinnen_und_Patienten.pdf;jsessionid=1185B669A9CD4A090FDE13ABA75890D2.1_cid297?__blob=publicationFile)  
 339 [r\\_Rechte\\_von\\_Patientinnen\\_und\\_Patienten.pdf;jsessionid=1185B669A9CD4A090FDE13ABA7](http://www.bmjv.de/SharedDocs/Downloads/DE/pdfs/Gesetze/Gesetz_zur_Verbesserung_der_Rechte_von_Patientinnen_und_Patienten.pdf;jsessionid=1185B669A9CD4A090FDE13ABA75890D2.1_cid297?__blob=publicationFile)  
 340 [5890D2.1\\_cid297?\\_\\_blob=publicationFile](http://www.bmjv.de/SharedDocs/Downloads/DE/pdfs/Gesetze/Gesetz_zur_Verbesserung_der_Rechte_von_Patientinnen_und_Patienten.pdf;jsessionid=1185B669A9CD4A090FDE13ABA75890D2.1_cid297?__blob=publicationFile) [cited 2014 04.12.2014]: 2013.
- 341 6 Baumgart J. Ambivalentes Verhältnis. *Dtsch Arztebl* 2010;**107**:2554–7.
- 342 7 Rathert C, Wyrwich MD, Boren SA. Patient-centered care and outcomes: a systematic review  
 343 of the literature. *Med care Res Rev* 2013;**70**:351–79. doi:10.1177/1077558712465774
- 344 8 Epstein RM, Franks P, Fiscella K, *et al.* Measuring patient-centered communication in patient-  
 345 physician consultations: Theoretical and practical issues. *Soc Sci Med* 2005;**61**:1516–  
 346 28.[internal-pdf://epstein\\_2005-3931253760/Epstein\\_2005.pdf](http://www.ncbi.nlm.nih.gov/entrez/query.fcgi?cmd=Retrieve&db=PubMed&dopt=Citation&list_uids=11005395)
- 347 9 Mead N, Bower P. Patient-centredness: A conceptual framework and review of the empirical  
 348 literature. *Soc Sci Med* 2000;**51**:1087–  
 349 110.[http://www.ncbi.nlm.nih.gov/entrez/query.fcgi?cmd=Retrieve&db=PubMed&dopt=Citati](http://www.ncbi.nlm.nih.gov/entrez/query.fcgi?cmd=Retrieve&db=PubMed&dopt=Citation&list_uids=11005395)  
 350 [on&list\\_uids=11005395](http://www.ncbi.nlm.nih.gov/entrez/query.fcgi?cmd=Retrieve&db=PubMed&dopt=Citation&list_uids=11005395)
- 351 10 Ouwens M, Hermens R, Hulscher M, *et al.* Development of indicators for patient-centred  
 352 cancer care. *Support Care cancer* 2010;**18**:121.
- 353 11 Stewart MA, Brown JB, Weston W, *et al.* *Patient-centered medicine - Transforming the clinical*  
 354 *method*. Abingdon: : Radcliffe Medical Press 2003.
- 355 12 Scholl I, Zill JM, Härter M, *et al.* An integrative model of patient-centeredness - A systematic  
 356 review and concept analysis. *PLoS One* 2014;**9**:e107828. doi:10.1371/journal.pone.0107828
- 357 13 van Dulmen S. Patient-centredness. *Patient Educ Couns* 2003;**51**:195–6. doi:10.1016/S0738-  
 358 3991(03)00039-9
- 359 14 Zill JM, Scholl I, Härter M, *et al.* Which Dimensions of Patient-Centeredness Matter? - Results



- 1  
2  
3 360 of a Web-Based Expert Delphi Survey. *PLoS One* 2015;**10**:e0141978.  
4  
5 361 doi:10.1371/journal.pone.0141978  
6  
7 362 15 Bensing J, Rimondini M, Visser A. What patients want. *Patient Educ Couns* 2013;**90**:287–90.  
8 363 doi:10.1016/j.pec.2013.01.005  
9  
10 364 16 Hudon C, Fortin M, Haggerty J, *et al.* Patient-centered care in chronic disease management: a  
11 365 thematic analysis of the literature in family medicine. *Patient Educ Couns* 2012;**88**:170–6.  
12 366 doi:10.1016/j.pec.2012.01.009  
13  
14 367 17 Luxford K. What does the patient know about quality? *Int J Qual Heal Care* 2012;**24**:439–40.  
15 368 doi:10.1093/intqhc/mzs053  
16  
17 369 18 Maassen EF, Schrevel SJC, Dedding CWM, *et al.* Comparing patients' perspectives of "good  
18 370 care" in Dutch outpatient psychiatric services with academic perspectives of patient-centred  
19 371 care. *J Ment Heal* 2017;**26**:84–94. doi:10.3109/09638237.2016.1167848  
20  
21 372 19 Yasein NA, Shakhathreh FM, Shroukh WA, *et al.* A Comparison between Patients' and  
22 373 Residents' Perceptions of Patient Centeredness and Communication Skills among Physicians  
23 374 Working at Jordan University Hospital. *Open J Nurs* 2017;**07**:698–706.  
24 375 doi:10.4236/ojn.2017.76052  
25  
26 376 20 Busse R, Riesberg A, World Health Organization. Health care systems in transition: Germany.  
27 377 Copenhagen: WHO Regional Office for Europe 2004.  
28  
29 378 21 Mossialos E, Djordjevic A, Osborn R, *et al.* International Profiles of Health Care Systems.  
30 379 Published Online First: 2017. doi:10.1056/NEJMp0910064  
31  
32 380 22 Christalle E, Zeh S, Hahlweg P, *et al.* Assessment of patient centredness through patient-  
33 381 reported experience measures (ASPIRED): Protocol of a mixed-methods study. *BMJ Open*  
34 382 2018;**8**:9–13. doi:10.1136/bmjopen-2018-025896  
35  
36 383 23 Boulkedid R, Abdoul H, Loustau M, *et al.* Using and reporting the delphi method for selecting  
37 384 healthcare quality indicators: A systematic review. *PLoS One* 2011;**6**:e20476.  
38 385 doi:10.1371/journal.pone.0020476  
39  
40 386 24 Hasson F, Keeney S, McKenna H. Research guidelines for the Delphi survey technique. *J Adv*  
41 387 *Nurs* 2000;**32**:1008–15.  
42  
43 388 25 van Rijssen LB, Gerritsen A, Henselmans I, *et al.* Core Set of Patient-reported Outcomes in  
44 389 Pancreatic Cancer (COPRAC): An International Delphi Study Among Patients and Health Care  
45 390 Providers. *Ann Surg* 2019;**270**:158–64. doi:10.1097/SLA.0000000000002633  
46  
47 391 26 Bundesministerium für Arbeit und Soziales. Leichte Sprache - Ein Ratgeber. 2014.  
48 392 27 Limesurvey GmbH. An Open Source survey tool /LimeSurvey GmbH, Hamburg, Germany.  
49 393 28 Jünger S, Payne SA, Brine J, *et al.* Guidance on Conducting and REporting DELphi Studies  
50 394 (CREDES) in palliative care: Recommendations based on a methodological systematic review.



1  
2  
3 395 *Palliat Med* 2017;**31**:684–706. doi:10.1177/0269216317690685  
4  
5 396 29 IBM SPSS Statistics for Windows. 2015.  
6 397 30 Santana MJ, Manalili K, Jolley RJ, *et al*. How to practice person-centred care: A conceptual  
7 398 framework. *Heal Expect* 2018;**21**:429–40. doi:10.1111/hex.12640  
8 399 31 Eurostat. Hospital discharges and length of stay for inpatient and curative care. 2018;:1–  
9 400 16.<http://appsso.eurostat.ec.europa.eu/nui/submitViewTableAction.do>  
10 401 32 Sacristan JA, Aguaron A, Avendaño C, *et al*. Patient involvement in clinical research: why,  
11 402 when, and how. *Patient Prefer Adherence* 2016;**10**:631–40. doi:10.2147/PPA.S104259  
12 403  
13 404  
14 405  
15 406  
16 407  
17 408  
18 409  
19 410  
20 411  
21 412  
22 413  
23 414  
24 415  
25 416  
26 417  
27 418  
28 419  
29 420  
30 421  
31 422  
32 423  
33 424  
34 425  
35 426  
36 427  
37 428  
38 429  
39  
40  
41  
42  
43  
44  
45  
46  
47  
48  
49  
50  
51  
52  
53  
54  
55  
56  
57  
58  
59  
60

1  
2  
3 4304  
5 431 **AUTHOR STATEMENT**

6 432 IS is the responsible principle investigator of the study. IS, PH and MH were involved in planning and  
7 433 preparation of the study. SZ and EC recruited participants and collected data, SZ analyzed the data.  
8 434 SZ, IS, EC and PH interpreted the results. SZ wrote the first draft of the manuscript. IS, EC, PH, MH  
9 435 critically revised the manuscript for relevant intellectual content. All authors gave final approval of  
10 436 the version to be published and agree to be accountable for the work.

11  
12  
13  
14  
15 43716 438 **DATA STATEMENT**

17 439 Corresponding with data transparency, data files can be made available with adaptations  
18 440 (pseudonyms and comments deleted due to data security) upon contacting the authors.

19  
20  
21  
22 44123 442 **CONFLICT OF INTERESTS**

24 443 PH gave one scientific presentation on shared decision-making during a lunch symposium, for which  
25 444 she received compensation and travel compensation from GlaxoSmithKline GmbH (pharmaceutical  
26 445 company) in 2018. The other authors declare that they have no competing interests.

27  
28  
29  
30 44631 447 **FUNDING STATEMENT**

32 448 This study is funded by the German Federal Ministry of Education and Research (Bundesministerium  
33 449 für Bildung und Forschung – BMBF) with the grant number 01GY1614. The funder had no role in  
34 450 decision to publish or preparation of the manuscript.

35  
36  
37  
38 45139 452 **ACKNOWLEDGEMENT**

40 453 We thank our student assistant Tanja Kloster and our research intern Lara Dreyer for supporting us  
41 454 preparing the manuscript and transcribing the interviews.

42  
43  
44  
45 45546 456 **ETHICS APPROVAL AND CONSENT TO PARTICIPATE**

47 457 The study was carried out according to the latest version of the Helsinki Declaration of the World  
48 458 Medical Association. Principles of good scientific practice were respected. The study had been  
49 459 approved by the Ethics Committee of the Medical Association Hamburg (study ID: PV5724) prior to  
50 460 the start of data collection. Study participation was voluntary and no foreseeable risks for  
51 461 participants resulted from the participation in this study. Participants were fully informed about the  
52 462 aims of the study, data collection, and the use of collected data. Written informed consent was  
53 463 obtained prior to participation. Preserving principles of data sensitivity, data protection, and  
54 464 confidentiality requirements were met.

1  
2  
3  
4  
5  
6  
7  
8  
9  
10  
11  
12  
13  
14  
15  
16  
17  
18  
19  
20  
21  
22  
23  
24  
25  
26  
27  
28  
29  
30  
31  
32  
33  
34  
35  
36  
37  
38  
39  
40  
41  
42  
43  
44  
45  
46  
47  
48  
49  
50  
51  
52  
53  
54  
55  
56  
57  
58  
59  
60

465  
466  
467  
468  
469  
470  
471  
472  
473  
474  
475  
476  
477  
478

**APPENDIX**

A1: Descriptions of the dimensions of PC (mail-based version)

[Insert A1 here]

S1: Overview of diseases indicated by patients (online supplement)

[Insert S1 here]

**Descriptions for figures:**

Figure 1. Integrative model of patient-centeredness

Figure 2. Flow chart for the Delphi study

For peer review only



Figure 1. Integrative model of patient-centeredness

119x142mm (300 x 300 DPI)

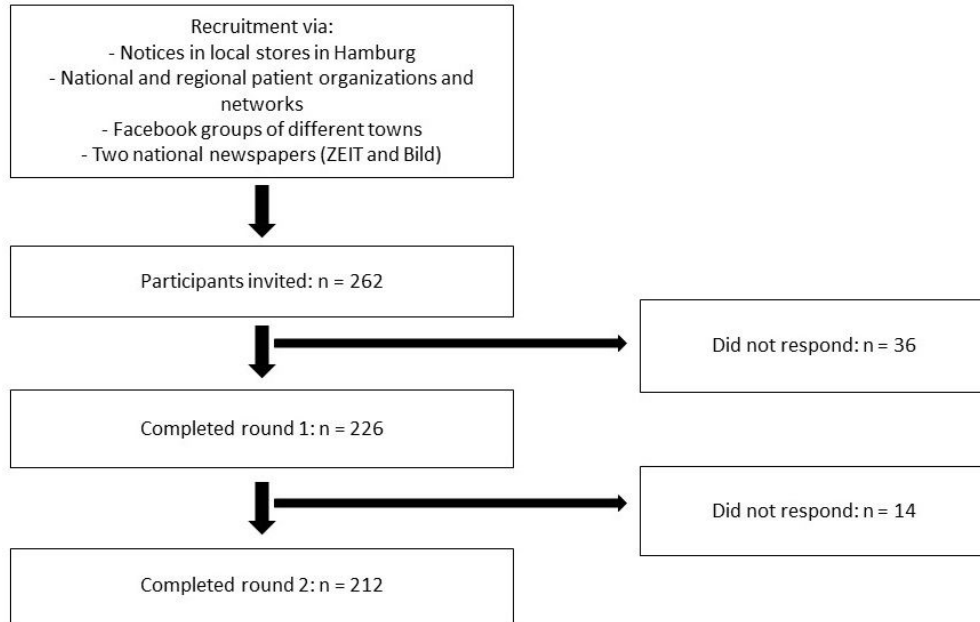

Figure 2. Flow chart for the Delphi study

74x47mm (300 x 300 DPI)

**S1: Overview of diseases indicated by patients (online supplement)**

| <i><b>Name of disease</b></i>                     | <i><b>Frequency</b></i> |
|---------------------------------------------------|-------------------------|
| Addiction disorder                                | 2                       |
| Allergies                                         | 1                       |
| Ametropia                                         | 1                       |
| Anemia                                            | 1                       |
| Asthma                                            | 3                       |
| Back pain                                         | 1                       |
| Cataract                                          | 1                       |
| Cholesterol disorder                              | 4                       |
| Chronic inflammatory demyelinating polyneuropathy | 3                       |
| Chronic obstipation                               | 1                       |
| Chronic obstructive pulmonary disease (COPD)      | 1                       |
| Chronic pain                                      | 1                       |
| Diabetes                                          | 12                      |
| Disorder of cardiac valves                        | 1                       |
| Disorder of carotids                              | 1                       |
| Disorder of cervical spine                        | 1                       |
| Disorder of conjunctive tissue                    | 1                       |
| Disorder of feet                                  | 1                       |
| Disorder of lungs                                 | 1                       |
| Disorder of stomach                               | 1                       |
| Endometriosis                                     | 2                       |
| Essential tremor                                  | 1                       |
| Eyelids disorder                                  | 1                       |
| Eyes damaged by hypertension                      | 1                       |
| Focal dystopia                                    | 1                       |
| Food allergy                                      | 1                       |
| Gastroesophageal reflux disease                   | 1                       |
| Glaucoma                                          | 1                       |
| Hardness of hearing                               | 2                       |
| Hashimoto's thyroiditis                           | 2                       |
| Heart attack                                      | 1                       |

1  
2  
3  
4  
5  
6  
7  
8  
9  
10  
11  
12  
13  
14  
15  
16  
17  
18  
19  
20  
21  
22  
23  
24  
25  
26  
27  
28  
29  
30  
31  
32  
33  
34  
35  
36  
37  
38  
39  
40  
41  
42  
43  
44  
45  
46  
47  
48  
49  
50  
51  
52  
53  
54  
55  
56  
57  
58  
59  
60

|                                      |   |
|--------------------------------------|---|
| Heartburn                            | 1 |
| HIV infection                        | 1 |
| Hypercalciuria                       | 1 |
| Hyperuricemia                        | 1 |
| Hypothyroidism                       | 4 |
| Incontinence                         | 1 |
| Inflammation of pancreas             | 1 |
| Intestinal surgery (removal of 10cm) | 1 |
| Irritable bowel syndrome             | 1 |
| Kidney insufficiency                 | 1 |
| Migraine                             | 2 |
| Multiple sclerosis                   | 1 |
| Neural pain                          | 1 |
| Neurodermatitis                      | 1 |
| Obesity                              | 2 |
| Polycystic ovary syndrome            | 1 |
| Potassium deficiency                 | 1 |
| Schwannoma                           | 1 |
| Scleroderma                          | 1 |
| Sjögren syndrome                     | 1 |
| Skin disorder                        | 1 |
| Sleep apnea                          | 5 |
| Sleep disorder                       | 2 |
| Snoring                              | 1 |
| Somatization disorder                | 1 |
| Somnambulism                         | 1 |
| Struma multinodosa                   | 1 |
| Strumectomy                          | 1 |
| Swaying/Pendulation                  | 1 |
| Takotsubo cardiomyopathy             | 1 |
| Thrombosis                           | 2 |
| Thyroiditis                          | 1 |
| Trichotillomania                     | 1 |
| Vitamin D deficiency                 | 1 |

Teilnehmercode: X

## Fragebogen für Patientinnen und Patienten

### Projekt „Patientenerfahrungen im Gesundheitswesen“

**Liebe Patientin, lieber Patient,**

Wir danken Ihnen herzlich für Ihre Antworten zu dem ersten Fragebogen. Wir haben uns Ihre Antworten durchgelesen und gemeinsam besprochen. Die häufigsten Rückmeldungen haben wir versucht einzuarbeiten. Das heißt, dass wir die Beschreibungen teilweise geändert haben. Die Änderungen haben wir jeweils **gelb** markiert. Außerdem ist ein Bestandteil, nämlich „Patientensicherheit“, neu hinzugekommen. Wir möchten Sie bitten, zu bewerten, ob Sie die Beschreibungen mit den Veränderungen besser oder schlechter finden.

Außerdem sehen Sie zu jedem Bestandteil Ihre Bewertung aus dem ersten Fragebogen sowie die Bewertung aller Teilnehmenden. Wir möchten Sie bitten, die Wichtigkeit und die Umsetzung aller Bestandteile noch einmal zu bewerten.

Wir verstehen, dass die Beschreibungen viele verschiedene Punkte beinhalten und es Ihnen deshalb manchmal schwerfällt, sie insgesamt zu bewerten. Besonders bei der Frage nach der Umsetzung kann das schwierig sein, weil Sie mit verschiedenen Behandlerinnen und Behandlern unterschiedliche Erfahrungen gemacht haben. Bitte versuchen Sie dennoch alles gemeinsam im Mittel zu bewerten.

Es gibt keine richtigen oder falschen Antworten.

Wenn Sie den Fragebogen ausgefüllt haben, stecken Sie ihn bitte in den beigegefügt Briefumschlag, verschließen ihn und versenden ihn (die Versandgebühr zahlt das Universitätsklinikum).

Wir freuen uns sehr, dass Sie an der Befragung teilnehmen. Bereits an dieser Stelle danken wir Ihnen ganz herzlich für Ihre Unterstützung.



Dr. phil. Isabelle Scholl  
(Projektleiterin)



Stefan Zeh, M.Sc.  
(Projektmitarbeiter)



Eva Christalle, M.Sc.  
(Projektmitarbeiterin)



## Überblick der Bestandteile von Patientenorientierung:

### I. Patientenorientierte Grundhaltung

1. Patientenorientierte Merkmale der Behandler/innen
2. Vertrauensvolles Miteinander
3. Einzigartigkeit jeder Patientin/ jedes Patienten
4. Berücksichtigung der Lebensumstände

### II. Rahmenbedingungen der Patientenorientierung

5. Angemessene Kommunikation
6. Einbezug ergänzender Angebote
7. Zusammenarbeit von Behandlern
8. Zugang zur Behandlung
9. Gute Planung der Behandlung

#### 10. Patientensicherheit

### III. Konkrete Handlungen und Maßnahmen

11. Persönlich angepasste Informationen
12. Gleichberechtigte Zusammenarbeit und Beteiligung bei Entscheidungen
13. Beteiligung von Familie und Freunden
14. Aktivierung der Patientinnen und Patienten
15. Unterstützung des körperlichen Wohlbefindens
16. Unterstützung des psychischen Wohlbefindens

#### **Vorbemerkung:**

Behandler/innen meint alle Berufsgruppen, die sich um Patientinnen und Patienten kümmern. Dies sind zum Beispiel Ärztinnen und Ärzte, Pflegefachkräfte, Physiotherapeutinnen und Physiotherapeuten sowie Psychologinnen und Psychologen. Da wir eine möglichst kurze Beschreibung verwenden möchten, haben wir uns für einen Sammelbegriff entschieden. In Ihrer Behandlung sind vielleicht alle genannten Berufsgruppen beteiligt, möglicherweise sogar noch mehr. Wenn Sie daher „Behandlerin“ oder „Behandler“ lesen, bitte denken Sie dabei an alle behandelnden Berufsgruppen, die an Ihrer Behandlung beteiligt sind.

## I. Patientenorientierte Grundhaltung

### 1. Patientenorientierte Merkmale der Behandler/innen

Die Behandler/innen sind:

- einfühlsam
- ehrlich
- wertschätzend

Die Behandler/innen sind sich des eigenen Verhaltens und der eigenen Gefühle bewusst. Die Behandler/innen verfügen über eine gute fachliche Kompetenz.

Bewertung der Wichtigkeit durch alle Teilnehmenden im Mittel: **X**

Ihre persönliche Bewertung der Wichtigkeit: **X**

a) Wie wichtig finden Sie diesen Bestandteil?

|               |                          |                          |                          |                          |                          |                          |                          |                          |                          |         |
|---------------|--------------------------|--------------------------|--------------------------|--------------------------|--------------------------|--------------------------|--------------------------|--------------------------|--------------------------|---------|
| Überhaupt     | <input type="checkbox"/> | Äußerst |
| nicht wichtig | 1                        | 2                        | 3                        | 4                        | 5                        | 6                        | 7                        | 8                        | 9                        | wichtig |

Bewertung der Umsetzung durch alle Teilnehmenden im Mittel: **X**

Ihre persönliche Bewertung der Umsetzung: **X**

b) Wie gut ist dieser Bestandteil Ihrer Erfahrung nach derzeit in Deutschland umgesetzt?

|                 |                          |                          |                          |                          |                          |                          |                          |                          |                          |             |
|-----------------|--------------------------|--------------------------|--------------------------|--------------------------|--------------------------|--------------------------|--------------------------|--------------------------|--------------------------|-------------|
| Überhaupt       | <input type="checkbox"/> | Vollständig |
| nicht umgesetzt | 1                        | 2                        | 3                        | 4                        | 5                        | 6                        | 7                        | 8                        | 9                        | umgesetzt   |

### 2. Vertrauensvolles Miteinander

Es besteht ein vertrauensvolles Miteinander zwischen Ihnen und der Behandlerin / dem Behandler. Wenn möglich gibt es gleichbleibende Ansprechpartner/innen. **Vor dem Gespräch informiert sich die Behandlerin / der Behandler über Ihren bisherigen Erkrankungsverlauf. Die Behandlerin / der Behandler spricht Sie auf bestehende Beschwerden und Ihr aktuelles Befinden an.**

a) Finden Sie, dass die Beschreibung mit den Veränderungen besser oder schlechter ist?

|            |                          |                          |                          |                          |                          |                          |                          |                          |                          |           |
|------------|--------------------------|--------------------------|--------------------------|--------------------------|--------------------------|--------------------------|--------------------------|--------------------------|--------------------------|-----------|
| Sehr viel  | <input type="checkbox"/> | Sehr viel |
| schlechter | 1                        | 2                        | 3                        | 4                        | 5                        | 6                        | 7                        | 8                        | 9                        | besser    |

Bewertung der Wichtigkeit durch alle Teilnehmenden im Mittel: **X**

Ihre persönliche Bewertung der Wichtigkeit: **X**

b) Wie wichtig finden Sie diesen Bestandteil?

|               |                          |                          |                          |                          |                          |                          |                          |                          |                          |         |
|---------------|--------------------------|--------------------------|--------------------------|--------------------------|--------------------------|--------------------------|--------------------------|--------------------------|--------------------------|---------|
| Überhaupt     | <input type="checkbox"/> | Äußerst |
| nicht wichtig | 1                        | 2                        | 3                        | 4                        | 5                        | 6                        | 7                        | 8                        | 9                        | wichtig |

Bewertung der Umsetzung durch alle Teilnehmenden im Mittel: **X**

Ihre persönliche Bewertung der Umsetzung: **X**

c) Wie gut ist dieser Bestandteil Ihrer Erfahrung nach derzeit in Deutschland umgesetzt?

|                 |                          |                          |                          |                          |                          |                          |                          |                          |                          |             |
|-----------------|--------------------------|--------------------------|--------------------------|--------------------------|--------------------------|--------------------------|--------------------------|--------------------------|--------------------------|-------------|
| Überhaupt       | <input type="checkbox"/> | Vollständig |
| nicht umgesetzt | 1                        | 2                        | 3                        | 4                        | 5                        | 6                        | 7                        | 8                        | 9                        | umgesetzt   |



### 3. Einzigartigkeit jeder Patientin/ jedes Patienten

Die Behandler/innen gehen ein auf:

- Bedürfnisse
- Wünsche
- Sorgen
- Erwartungen

Sie erkennen an, dass Menschen verschieden sind.

Bewertung der Wichtigkeit durch alle Teilnehmenden im Mittel: **X**

Ihre persönliche Bewertung der Wichtigkeit: **X**

a) Wie wichtig finden Sie diesen Bestandteil?

|               |                          |                          |                          |                          |                          |                          |                          |                          |                          |         |
|---------------|--------------------------|--------------------------|--------------------------|--------------------------|--------------------------|--------------------------|--------------------------|--------------------------|--------------------------|---------|
| Überhaupt     | <input type="checkbox"/> | Äußerst |
| nicht wichtig | 1                        | 2                        | 3                        | 4                        | 5                        | 6                        | 7                        | 8                        | 9                        | wichtig |

Bewertung der Umsetzung durch alle Teilnehmenden im Mittel: **X**

Ihre persönliche Bewertung der Umsetzung: **X**

b) Wie gut ist dieser Bestandteil Ihrer Erfahrung nach derzeit in Deutschland umgesetzt?

|                 |                          |                          |                          |                          |                          |                          |                          |                          |                          |             |
|-----------------|--------------------------|--------------------------|--------------------------|--------------------------|--------------------------|--------------------------|--------------------------|--------------------------|--------------------------|-------------|
| Überhaupt       | <input type="checkbox"/> | Vollständig |
| nicht umgesetzt | 1                        | 2                        | 3                        | 4                        | 5                        | 6                        | 7                        | 8                        | 9                        | umgesetzt   |

### 4. Berücksichtigung der Lebensumstände

Die Behandler/innen sehen Sie als ganze Menschen. Es werden bei der Behandlung alle Lebensbereiche einbezogen.

Beispiele dafür sind:

- Körper
- Psyche/ Seele
- Familie und Freunde
- Beruf und Freizeit

a) Finden Sie, dass die Beschreibung mit den Veränderungen besser oder schlechter ist?

|            |                          |                          |                          |                          |                          |                          |                          |                          |                          |           |
|------------|--------------------------|--------------------------|--------------------------|--------------------------|--------------------------|--------------------------|--------------------------|--------------------------|--------------------------|-----------|
| Sehr viel  | <input type="checkbox"/> | Sehr viel |
| schlechter | 1                        | 2                        | 3                        | 4                        | 5                        | 6                        | 7                        | 8                        | 9                        | besser    |

Bewertung der Wichtigkeit durch alle Teilnehmenden im Mittel: **X**

Ihre persönliche Bewertung der Wichtigkeit: **X**

b) Wie wichtig finden Sie diesen Bestandteil?

|               |                          |                          |                          |                          |                          |                          |                          |                          |                          |         |
|---------------|--------------------------|--------------------------|--------------------------|--------------------------|--------------------------|--------------------------|--------------------------|--------------------------|--------------------------|---------|
| Überhaupt     | <input type="checkbox"/> | Äußerst |
| nicht wichtig | 1                        | 2                        | 3                        | 4                        | 5                        | 6                        | 7                        | 8                        | 9                        | wichtig |

Bewertung der Umsetzung durch alle Teilnehmenden im Mittel: **X**

Ihre persönliche Bewertung der Umsetzung: **X**

c) Wie gut ist dieser Bestandteil Ihrer Erfahrung nach derzeit in Deutschland umgesetzt?

|                 |                          |                          |                          |                          |                          |                          |                          |                          |                          |             |
|-----------------|--------------------------|--------------------------|--------------------------|--------------------------|--------------------------|--------------------------|--------------------------|--------------------------|--------------------------|-------------|
| Überhaupt       | <input type="checkbox"/> | Vollständig |
| nicht umgesetzt | 1                        | 2                        | 3                        | 4                        | 5                        | 6                        | 7                        | 8                        | 9                        | umgesetzt   |

## II. Rahmenbedingungen der Patientorientierung

### 5. Angemessene Kommunikation

Die Behandler/innen kommunizieren angemessen und unterstützend mit Ihnen. Beispiele dafür sind:

- Leicht verständliche Sprache
- Fragen stellen
- Aufmerksam zuhören
- Blickkontakt halten

Bewertung der Wichtigkeit durch alle Teilnehmenden im Mittel: **X**

Ihre persönliche Bewertung der Wichtigkeit: **X**

a) Wie wichtig finden Sie diesen Bestandteil?

|               |                          |                          |                          |                          |                          |                          |                          |                          |                          |         |
|---------------|--------------------------|--------------------------|--------------------------|--------------------------|--------------------------|--------------------------|--------------------------|--------------------------|--------------------------|---------|
| Überhaupt     | <input type="checkbox"/> | Äußerst |
| nicht wichtig | 1                        | 2                        | 3                        | 4                        | 5                        | 6                        | 7                        | 8                        | 9                        | wichtig |

Bewertung der Umsetzung durch alle Teilnehmenden im Mittel: **X**

Ihre persönliche Bewertung der Umsetzung: **X**

b) Wie gut ist dieser Bestandteil Ihrer Erfahrung nach derzeit in Deutschland umgesetzt?

|                 |                          |                          |                          |                          |                          |                          |                          |                          |                          |             |
|-----------------|--------------------------|--------------------------|--------------------------|--------------------------|--------------------------|--------------------------|--------------------------|--------------------------|--------------------------|-------------|
| Überhaupt       | <input type="checkbox"/> | Vollständig |
| nicht umgesetzt | 1                        | 2                        | 3                        | 4                        | 5                        | 6                        | 7                        | 8                        | 9                        | umgesetzt   |

### 6. Einbezug ergänzender Angebote

Ergänzende Angebote werden anerkannt und in die Behandlung einbezogen, falls Sie sich das wünschen.

Beispiele dafür sind:

- Selbsthilfegruppen
- Alternativmedizin / Komplementärmedizin (z.B. Homöopathie, Osteopathie, Akupunktur und Naturheilkunde)
- Spirituelle Unterstützung / Seelsorge

Bewertung der Wichtigkeit durch alle Teilnehmenden im Mittel: **X**

Ihre persönliche Bewertung der Wichtigkeit: **X**

a) Wie wichtig finden Sie diesen Bestandteil?

|               |                          |                          |                          |                          |                          |                          |                          |                          |                          |         |
|---------------|--------------------------|--------------------------|--------------------------|--------------------------|--------------------------|--------------------------|--------------------------|--------------------------|--------------------------|---------|
| Überhaupt     | <input type="checkbox"/> | Äußerst |
| nicht wichtig | 1                        | 2                        | 3                        | 4                        | 5                        | 6                        | 7                        | 8                        | 9                        | wichtig |

Bewertung der Umsetzung durch alle Teilnehmenden im Mittel: **X**

Ihre persönliche Bewertung der Umsetzung: **X**

b) Wie gut ist dieser Bestandteil Ihrer Erfahrung nach derzeit in Deutschland umgesetzt?

|                 |                          |                          |                          |                          |                          |                          |                          |                          |                          |             |
|-----------------|--------------------------|--------------------------|--------------------------|--------------------------|--------------------------|--------------------------|--------------------------|--------------------------|--------------------------|-------------|
| Überhaupt       | <input type="checkbox"/> | Vollständig |
| nicht umgesetzt | 1                        | 2                        | 3                        | 4                        | 5                        | 6                        | 7                        | 8                        | 9                        | umgesetzt   |



## 7. Zusammenarbeit von Behandlern

Innerhalb einer großen Praxis oder eines Krankenhauses hat die Zusammenarbeit einen hohen Stellenwert. Behandler/innen aus verschiedenen medizinischen Fachbereichen und Berufsgruppen arbeiten gut als Team zusammen. Die Zusammenarbeit ist geprägt von:

- Guten Absprachen
- Respekt
- Vertrauen
- Gemeinsamer Verantwortung

Die Leitungsebene fördert diese Teamarbeit.

Bewertung der Wichtigkeit durch alle Teilnehmenden im Mittel: **X**

Ihre persönliche Bewertung der Wichtigkeit: **X**

a) Wie wichtig finden Sie diesen Bestandteil?

|               |                          |                          |                          |                          |                          |                          |                          |                          |                          |         |
|---------------|--------------------------|--------------------------|--------------------------|--------------------------|--------------------------|--------------------------|--------------------------|--------------------------|--------------------------|---------|
| Überhaupt     | <input type="checkbox"/> | Äußerst |
| nicht wichtig | 1                        | 2                        | 3                        | 4                        | 5                        | 6                        | 7                        | 8                        | 9                        | wichtig |

Bewertung der Umsetzung durch alle Teilnehmenden im Mittel: **X**

Ihre persönliche Bewertung der Umsetzung: **X**

b) Wie gut ist dieser Bestandteil Ihrer Erfahrung nach derzeit in Deutschland umgesetzt?

|                 |                          |                          |                          |                          |                          |                          |                          |                          |                          |             |
|-----------------|--------------------------|--------------------------|--------------------------|--------------------------|--------------------------|--------------------------|--------------------------|--------------------------|--------------------------|-------------|
| Überhaupt       | <input type="checkbox"/> | Vollständig |
| nicht umgesetzt | 1                        | 2                        | 3                        | 4                        | 5                        | 6                        | 7                        | 8                        | 9                        | umgesetzt   |

## 8. Zugang zur Behandlung

Sie erreichen Behandler/innen leicht und ohne Hindernisse.

Beispiele hierfür sind:

- Krankenhäuser und Arztpraxen in der Nähe des Wohnortes (auch auf dem Land)
- Guter Zugang zur Behandlung auch bei möglichen Hindernissen (z.B. Behinderung oder mangelnden Deutschkenntnissen)
- Möglichst geringe Zuzahlungen bei Kassenleistungen **unter Berücksichtigung Ihrer finanziellen Möglichkeiten**
- **Gute Terminvergabe: Sie erhalten Termine rechtzeitig (auch Facharzttermine) und flexibel (z.B. auch telefonisch oder per Mail). Es wird ausreichend Zeit für den Termin eingeplant**
- **Bei einem Notfall erhalten Sie eine Behandlung auch außerhalb der üblichen Praxiszeiten (z.B. Bereitschaftsdienst oder Hausbesuche).**
- **Sie erhalten leicht Informationen darüber, welche Behandler/innen welche Behandlungen und Spezialisierungen anbieten.**

a) Finden Sie, dass die Beschreibung mit den Veränderungen besser oder schlechter ist?

|                      |                          |                          |                          |                          |                          |                          |                          |                          |                          |                          |                  |
|----------------------|--------------------------|--------------------------|--------------------------|--------------------------|--------------------------|--------------------------|--------------------------|--------------------------|--------------------------|--------------------------|------------------|
| Sehr viel schlechter | <input type="checkbox"/> | Sehr viel besser |
|                      | 1                        | 2                        | 3                        | 4                        | 5                        | 6                        | 7                        | 8                        | 9                        |                          |                  |

Bewertung der Wichtigkeit durch alle Teilnehmenden im Mittel: **X**

Ihre persönliche Bewertung der Wichtigkeit: **X**

b) Wie wichtig finden Sie diesen Bestandteil?

|                         |                          |                          |                          |                          |                          |                          |                          |                          |                          |                          |                 |
|-------------------------|--------------------------|--------------------------|--------------------------|--------------------------|--------------------------|--------------------------|--------------------------|--------------------------|--------------------------|--------------------------|-----------------|
| Überhaupt nicht wichtig | <input type="checkbox"/> | Äußerst wichtig |
|                         | 1                        | 2                        | 3                        | 4                        | 5                        | 6                        | 7                        | 8                        | 9                        |                          |                 |

Bewertung der Umsetzung durch alle Teilnehmenden im Mittel: **X**

Ihre persönliche Bewertung der Umsetzung: **X**

c) Wie gut ist dieser Bestandteil Ihrer Erfahrung nach derzeit in Deutschland umgesetzt?

|                           |                          |                          |                          |                          |                          |                          |                          |                          |                          |                          |                       |
|---------------------------|--------------------------|--------------------------|--------------------------|--------------------------|--------------------------|--------------------------|--------------------------|--------------------------|--------------------------|--------------------------|-----------------------|
| Überhaupt nicht umgesetzt | <input type="checkbox"/> | Vollständig umgesetzt |
|                           | 1                        | 2                        | 3                        | 4                        | 5                        | 6                        | 7                        | 8                        | 9                        |                          |                       |



## 9. Gute Planung der Behandlung

Es wird eine aufeinander abgestimmte und fortlaufende Behandlung sichergestellt.

Das bedeutet:

- Aufeinanderfolgende Behandlungen werden abgesprochen und geplant
- Termine zur Kontrolle und Nachsorge werden vereinbart
- Gute Absprachen beim Wechsel zwischen Krankenhäusern und Arztpraxen

Sie erhalten auf Wunsch Unterstützung durch einen festen Ansprechpartner im Gesundheitswesen, der Ihnen dabei hilft, die Behandlungen und Termine zu organisieren.

a) Finden Sie, dass die Beschreibung mit den Veränderungen besser oder schlechter ist?

|                      |                          |                          |                          |                          |                          |                          |                          |                          |                          |                  |
|----------------------|--------------------------|--------------------------|--------------------------|--------------------------|--------------------------|--------------------------|--------------------------|--------------------------|--------------------------|------------------|
| Sehr viel schlechter | <input type="checkbox"/> | Sehr viel besser |
|                      | 1                        | 2                        | 3                        | 4                        | 5                        | 6                        | 7                        | 8                        | 9                        |                  |

Bewertung der Wichtigkeit durch alle Teilnehmenden im Mittel: X

Ihre persönliche Bewertung der Wichtigkeit: X

b) Wie wichtig finden Sie diesen Bestandteil?

|                         |                          |                          |                          |                          |                          |                          |                          |                          |                          |                 |
|-------------------------|--------------------------|--------------------------|--------------------------|--------------------------|--------------------------|--------------------------|--------------------------|--------------------------|--------------------------|-----------------|
| Überhaupt nicht wichtig | <input type="checkbox"/> | Äußerst wichtig |
|                         | 1                        | 2                        | 3                        | 4                        | 5                        | 6                        | 7                        | 8                        | 9                        |                 |

Bewertung der Umsetzung durch alle Teilnehmenden im Mittel: X

Ihre persönliche Bewertung der Umsetzung: X

c) Wie gut ist dieser Bestandteil Ihrer Erfahrung nach derzeit in Deutschland umgesetzt?

|                           |                          |                          |                          |                          |                          |                          |                          |                          |                          |                       |
|---------------------------|--------------------------|--------------------------|--------------------------|--------------------------|--------------------------|--------------------------|--------------------------|--------------------------|--------------------------|-----------------------|
| Überhaupt nicht umgesetzt | <input type="checkbox"/> | Vollständig umgesetzt |
|                           | 1                        | 2                        | 3                        | 4                        | 5                        | 6                        | 7                        | 8                        | 9                        |                       |

## 10. Patientensicherheit

Die Behandlung wird so gestaltet, dass Ihr Risiko für negative Folgen und Fehler in der Behandlung möglichst gering ist.

Beispiele hierfür sind:

- Sauberkeit der Einrichtungen und der medizinischen Instrumente
- Aktuelle wissenschaftliche Ergebnisse werden bei der Behandlung berücksichtigt
- Wechselwirkungen zwischen verschiedenen Medikamenten werden beachtet
- Gründliche Aufzeichnung des Behandlungsverlaufs

a) Finden Sie, dass die Beschreibung mit den Veränderungen besser oder schlechter ist?

|                      |                          |                          |                          |                          |                          |                          |                          |                          |                          |                  |
|----------------------|--------------------------|--------------------------|--------------------------|--------------------------|--------------------------|--------------------------|--------------------------|--------------------------|--------------------------|------------------|
| Sehr viel schlechter | <input type="checkbox"/> | Sehr viel besser |
|                      | 1                        | 2                        | 3                        | 4                        | 5                        | 6                        | 7                        | 8                        | 9                        |                  |

Bewertung der Wichtigkeit durch alle Teilnehmenden im Mittel: **X**

Ihre persönliche Bewertung der Wichtigkeit: **X**

b) Wie wichtig finden Sie diesen Bestandteil?

|                         |                          |                          |                          |                          |                          |                          |                          |                          |                          |                 |
|-------------------------|--------------------------|--------------------------|--------------------------|--------------------------|--------------------------|--------------------------|--------------------------|--------------------------|--------------------------|-----------------|
| Überhaupt nicht wichtig | <input type="checkbox"/> | Äußerst wichtig |
|                         | 1                        | 2                        | 3                        | 4                        | 5                        | 6                        | 7                        | 8                        | 9                        |                 |

Bewertung der Umsetzung durch alle Teilnehmenden im Mittel: **X**

Ihre persönliche Bewertung der Umsetzung: **X**

c) Wie gut ist dieser Bestandteil Ihrer Erfahrung nach derzeit in Deutschland umgesetzt?

|                           |                          |                          |                          |                          |                          |                          |                          |                          |                          |                       |
|---------------------------|--------------------------|--------------------------|--------------------------|--------------------------|--------------------------|--------------------------|--------------------------|--------------------------|--------------------------|-----------------------|
| Überhaupt nicht umgesetzt | <input type="checkbox"/> | Vollständig umgesetzt |
|                           | 1                        | 2                        | 3                        | 4                        | 5                        | 6                        | 7                        | 8                        | 9                        |                       |



### III. Konkrete Handlungen und Maßnahmen

#### 11. Persönlich angepasste Informationen

Die Behandler/innen geben Ihnen Informationen über Ihre Vorsorge, Erkrankung und die Behandlungsmöglichkeiten **und deren mögliche Kosten in Form von Zuzahlungen**. Diese Informationen sind angepasst an Ihre persönlichen Wünsche und Bedürfnisse. Sie werden ermutigt, Ihr eigenes Wissen mit den Behandler/innen zu teilen. **Wenn Sie Medikamente verschrieben bekommen, erhalten Sie eine schriftliche Übersicht über die Einnahme und die möglichen Nebenwirkungen (Medikamentenplan).**

a) Finden Sie, dass die Beschreibung mit den Veränderungen besser oder schlechter ist?

|                      |                          |                          |                          |                          |                          |                          |                          |                          |                          |                  |
|----------------------|--------------------------|--------------------------|--------------------------|--------------------------|--------------------------|--------------------------|--------------------------|--------------------------|--------------------------|------------------|
| Sehr viel schlechter | <input type="checkbox"/> | Sehr viel besser |
|                      | 1                        | 2                        | 3                        | 4                        | 5                        | 6                        | 7                        | 8                        | 9                        |                  |

Bewertung der Wichtigkeit durch alle Teilnehmenden im Mittel: **X**

Ihre persönliche Bewertung der Wichtigkeit: **X**

b) Wie wichtig finden Sie diesen Bestandteil?

|                         |                          |                          |                          |                          |                          |                          |                          |                          |                          |                 |
|-------------------------|--------------------------|--------------------------|--------------------------|--------------------------|--------------------------|--------------------------|--------------------------|--------------------------|--------------------------|-----------------|
| Überhaupt nicht wichtig | <input type="checkbox"/> | Äußerst wichtig |
|                         | 1                        | 2                        | 3                        | 4                        | 5                        | 6                        | 7                        | 8                        | 9                        |                 |

Bewertung der Umsetzung durch alle Teilnehmenden im Mittel: **X**

Ihre persönliche Bewertung der Umsetzung: **X**

c) Wie gut ist dieser Bestandteil Ihrer Erfahrung nach derzeit in Deutschland umgesetzt?

|                           |                          |                          |                          |                          |                          |                          |                          |                          |                          |                       |
|---------------------------|--------------------------|--------------------------|--------------------------|--------------------------|--------------------------|--------------------------|--------------------------|--------------------------|--------------------------|-----------------------|
| Überhaupt nicht umgesetzt | <input type="checkbox"/> | Vollständig umgesetzt |
|                           | 1                        | 2                        | 3                        | 4                        | 5                        | 6                        | 7                        | 8                        | 9                        |                       |

#### 12. Gleichberechtigte Zusammenarbeit und Beteiligung bei Entscheidungen

Es wird eine gleichberechtigte Zusammenarbeit zwischen Ihnen und den Behandler/innen angestrebt. Entscheidungen zur Behandlung werden gemeinsam getroffen, falls Sie sich das wünschen. Dabei bringen Sie aktiv Ihre eigene Sicht, Wünsche und Ziele mit ein.

Bewertung der Wichtigkeit durch alle Teilnehmenden im Mittel: **X**

Ihre persönliche Bewertung der Wichtigkeit: **X**

a) Wie wichtig finden Sie diesen Bestandteil?

|                         |                          |                          |                          |                          |                          |                          |                          |                          |                          |                 |
|-------------------------|--------------------------|--------------------------|--------------------------|--------------------------|--------------------------|--------------------------|--------------------------|--------------------------|--------------------------|-----------------|
| Überhaupt nicht wichtig | <input type="checkbox"/> | Äußerst wichtig |
|                         | 1                        | 2                        | 3                        | 4                        | 5                        | 6                        | 7                        | 8                        | 9                        |                 |

Bewertung der Umsetzung durch alle Teilnehmenden im Mittel: **X**

Ihre persönliche Bewertung der Umsetzung: **X**

b) Wie gut ist dieser Bestandteil Ihrer Erfahrung nach derzeit in Deutschland umgesetzt?

|                           |                          |                          |                          |                          |                          |                          |                          |                          |                          |                       |
|---------------------------|--------------------------|--------------------------|--------------------------|--------------------------|--------------------------|--------------------------|--------------------------|--------------------------|--------------------------|-----------------------|
| Überhaupt nicht umgesetzt | <input type="checkbox"/> | Vollständig umgesetzt |
|                           | 1                        | 2                        | 3                        | 4                        | 5                        | 6                        | 7                        | 8                        | 9                        |                       |

**13. Beteiligung von Familie und Freunden**

Ihre Familienmitglieder und Freunde werden in dem Maß in die Behandlung einbezogen, wie Sie es sich wünschen.

Beispiele dafür sind:

- Familie und Freunde bekommen Informationen
- Familie und Freunde nehmen an Gesprächen teil
- Familie und Freunde unterstützen aktiv die Behandlung im Alltag (z.B. beim Einnehmen von Medikamenten oder Hinbringen zur Behandlung)

Bewertung der Wichtigkeit durch alle Teilnehmenden im Mittel: **X**  
Ihre persönliche Bewertung der Wichtigkeit: **X**

a) Wie wichtig finden Sie diesen Bestandteil?

|               |                          |                          |                          |                          |                          |                          |                          |                          |                          |         |
|---------------|--------------------------|--------------------------|--------------------------|--------------------------|--------------------------|--------------------------|--------------------------|--------------------------|--------------------------|---------|
| Überhaupt     | <input type="checkbox"/> | Äußerst |
| nicht wichtig | 1                        | 2                        | 3                        | 4                        | 5                        | 6                        | 7                        | 8                        | 9                        | wichtig |

Bewertung der Umsetzung durch alle Teilnehmenden im Mittel: **X**  
Ihre persönliche Bewertung der Umsetzung: **X**

b) Wie gut ist dieser Bestandteil Ihrer Erfahrung nach derzeit in Deutschland umgesetzt?

|                 |                          |                          |                          |                          |                          |                          |                          |                          |                          |             |
|-----------------|--------------------------|--------------------------|--------------------------|--------------------------|--------------------------|--------------------------|--------------------------|--------------------------|--------------------------|-------------|
| Überhaupt       | <input type="checkbox"/> | Vollständig |
| nicht umgesetzt | 1                        | 2                        | 3                        | 4                        | 5                        | 6                        | 7                        | 8                        | 9                        | umgesetzt   |

**14. Aktivierung der Patientinnen und Patienten**

Die Behandler/innen bestärken Sie darin, aktiv und selbstständig mit Ihrer Erkrankung und der Behandlung umzugehen. Dadurch werden Sie zu Experten Ihrer eigenen Erkrankung.

Beispiele dafür sind:

- Im Alltag gut mit den Anforderungen der Erkrankung umgehen
- Aktiv am Gespräch mit Behandler/innen teilnehmen
- Zurechtfinden im Gesundheitswesen
- Möglichkeiten zur Verbesserung der eigenen Situation suchen (z.B. mehr Sport treiben oder ein neues Hobby für sich finden)

a) Finden Sie, dass die Beschreibung mit den Veränderungen besser oder schlechter ist?

|            |                          |                          |                          |                          |                          |                          |                          |                          |                          |           |
|------------|--------------------------|--------------------------|--------------------------|--------------------------|--------------------------|--------------------------|--------------------------|--------------------------|--------------------------|-----------|
| Sehr viel  | <input type="checkbox"/> | Sehr viel |
| schlechter | 1                        | 2                        | 3                        | 4                        | 5                        | 6                        | 7                        | 8                        | 9                        | besser    |

Bewertung der Wichtigkeit durch alle Teilnehmenden im Mittel: **X**  
Ihre persönliche Bewertung der Wichtigkeit: **X**

b) Wie wichtig finden Sie diesen Bestandteil?

|               |                          |                          |                          |                          |                          |                          |                          |                          |                          |         |
|---------------|--------------------------|--------------------------|--------------------------|--------------------------|--------------------------|--------------------------|--------------------------|--------------------------|--------------------------|---------|
| Überhaupt     | <input type="checkbox"/> | Äußerst |
| nicht wichtig | 1                        | 2                        | 3                        | 4                        | 5                        | 6                        | 7                        | 8                        | 9                        | wichtig |

Bewertung der Umsetzung durch alle Teilnehmenden im Mittel: **X**  
Ihre persönliche Bewertung der Umsetzung: **X**

c) Wie gut ist dieser Bestandteil Ihrer Erfahrung nach derzeit in Deutschland umgesetzt?

|                 |                          |                          |                          |                          |                          |                          |                          |                          |                          |             |
|-----------------|--------------------------|--------------------------|--------------------------|--------------------------|--------------------------|--------------------------|--------------------------|--------------------------|--------------------------|-------------|
| Überhaupt       | <input type="checkbox"/> | Vollständig |
| nicht umgesetzt | 1                        | 2                        | 3                        | 4                        | 5                        | 6                        | 7                        | 8                        | 9                        | umgesetzt   |

## 15. Unterstützung des körperlichen Wohlbefindens

Die Behandler/innen kümmern sich um Ihr körperliches Wohlbefinden.

Beispiele dafür sind:

- Behandlung von Schmerzen
- Gesunde Ernährung
- Unterstützung im Alltag (z.B. durch die Verordnung von Gehhilfen **und durch Übungen, diese im Alltag richtig zu benutzen**)

a) Finden Sie, dass die Beschreibung mit den Veränderungen besser oder schlechter ist?

|                      |                          |                          |                          |                          |                          |                          |                          |                          |                          |                  |
|----------------------|--------------------------|--------------------------|--------------------------|--------------------------|--------------------------|--------------------------|--------------------------|--------------------------|--------------------------|------------------|
| Sehr viel schlechter | <input type="checkbox"/> | Sehr viel besser |
|                      | 1                        | 2                        | 3                        | 4                        | 5                        | 6                        | 7                        | 8                        | 9                        |                  |

Bewertung der Wichtigkeit durch alle Teilnehmenden im Mittel: **X**

Ihre persönliche Bewertung der Wichtigkeit: **X**

b) Wie wichtig finden Sie diesen Bestandteil?

|                         |                          |                          |                          |                          |                          |                          |                          |                          |                          |                 |
|-------------------------|--------------------------|--------------------------|--------------------------|--------------------------|--------------------------|--------------------------|--------------------------|--------------------------|--------------------------|-----------------|
| Überhaupt nicht wichtig | <input type="checkbox"/> | Äußerst wichtig |
|                         | 1                        | 2                        | 3                        | 4                        | 5                        | 6                        | 7                        | 8                        | 9                        |                 |

Bewertung der Umsetzung durch alle Teilnehmenden im Mittel: **X**

Ihre persönliche Bewertung der Umsetzung: **X**

c) Wie gut ist dieser Bestandteil Ihrer Erfahrung nach derzeit in Deutschland umgesetzt?

|                           |                          |                          |                          |                          |                          |                          |                          |                          |                          |                       |
|---------------------------|--------------------------|--------------------------|--------------------------|--------------------------|--------------------------|--------------------------|--------------------------|--------------------------|--------------------------|-----------------------|
| Überhaupt nicht umgesetzt | <input type="checkbox"/> | Vollständig umgesetzt |
|                           | 1                        | 2                        | 3                        | 4                        | 5                        | 6                        | 7                        | 8                        | 9                        |                       |

## 16. Unterstützung des psychischen Wohlbefindens

Die Behandler/innen gehen auf Ihre Gefühlslage und Ihr psychisches Befinden ein.

Beispiele dafür sind:

- Ansprechen von Sorgen und Ängsten
- Angebot psychologischer Unterstützung

Bewertung der Wichtigkeit durch alle Teilnehmenden im Mittel: **X**

Ihre persönliche Bewertung der Wichtigkeit: **X**

a) Wie wichtig finden Sie diesen Bestandteil?

|                         |                          |                          |                          |                          |                          |                          |                          |                          |                          |                 |
|-------------------------|--------------------------|--------------------------|--------------------------|--------------------------|--------------------------|--------------------------|--------------------------|--------------------------|--------------------------|-----------------|
| Überhaupt nicht wichtig | <input type="checkbox"/> | Äußerst wichtig |
|                         | 1                        | 2                        | 3                        | 4                        | 5                        | 6                        | 7                        | 8                        | 9                        |                 |

Bewertung der Umsetzung durch alle Teilnehmenden im Mittel: **X**

Ihre persönliche Bewertung der Umsetzung: **X**

b) Wie gut ist dieser Bestandteil Ihrer Erfahrung nach derzeit in Deutschland umgesetzt?

|                           |                          |                          |                          |                          |                          |                          |                          |                          |                          |                       |
|---------------------------|--------------------------|--------------------------|--------------------------|--------------------------|--------------------------|--------------------------|--------------------------|--------------------------|--------------------------|-----------------------|
| Überhaupt nicht umgesetzt | <input type="checkbox"/> | Vollständig umgesetzt |
|                           | 1                        | 2                        | 3                        | 4                        | 5                        | 6                        | 7                        | 8                        | 9                        |                       |



Sie haben nun unsere Beschreibung zur Patientenorientierung gelesen und bewertet.

Wenn Sie finden, dass Bestandteile in unserer Beschreibung immer noch fehlen, können Sie diese hier benennen:

---

---

---

---

---

---

---

---

---

---

Haben Sie noch weitere Anmerkungen zu der Beschreibung (z.B. Verständlichkeit)?

---

---

---

---

---

---

---

---

Vielen Dank für das Ausfüllen des Fragebogens. Sie haben uns damit sehr geholfen und einen Beitrag für die Verbesserung der Versorgung geleistet!
