# Supplementary material for: Assessing the relevance and implementation of patient-centredness from the patients’ perspective in Germany: results of a Delphi study
Source: PubMed Central journal article supplement — BMJ Open. 2019 Dec 23;9(12):e031741. doi: 10.1136/bmjopen-2019-031741 (PMC7008421; doi:10.1136/bmjopen-2019-031741), 2019-12-23
Supplement: bmjopen-2019-031741supp001.pdf [file bmjopen-2019-031741supp001.pdf]

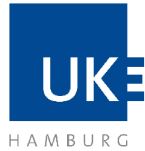

Institut und Poliklinik für Medizinische Psychologie

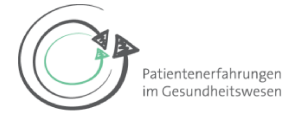

Teilnehmercode: X

## Fragebogen für Patientinnen und Patienten

### Projekt „Patientenerfahrungen im Gesundheitswesen“

#### Liebe Patientin, lieber Patient,

Wir danken Ihnen herzlich für Ihre Antworten zu dem ersten Fragebogen. Wir haben uns Ihre Antworten durchgelesen und gemeinsam besprochen. Die häufigsten Rückmeldungen haben wir versucht einzuarbeiten. Das heißt, dass wir die Beschreibungen teilweise geändert haben. Die Änderungen haben wir jeweils **gelb** markiert. Außerdem ist ein Bestandteil, nämlich „Patientensicherheit“, neu hinzugekommen. Wir möchten Sie bitten, zu bewerten, ob Sie die Beschreibungen mit den Veränderungen besser oder schlechter finden.

Außerdem sehen Sie zu jedem Bestandteil Ihre Bewertung aus dem ersten Fragebogen sowie die Bewertung aller Teilnehmenden. Wir möchten Sie bitten, die Wichtigkeit und die Umsetzung aller Bestandteile noch einmal zu bewerten.

Wir verstehen, dass die Beschreibungen viele verschiedene Punkte beinhalten und es Ihnen deshalb manchmal schwerfällt, sie insgesamt zu bewerten. Besonders bei der Frage nach der Umsetzung kann das schwierig sein, weil Sie mit verschiedenen Behandlerinnen und Behandlern unterschiedliche Erfahrungen gemacht haben. Bitte versuchen Sie dennoch alles gemeinsam im Mittel zu bewerten.

Es gibt keine richtigen oder falschen Antworten.

Wenn Sie den Fragebogen ausgefüllt haben, stecken Sie ihn bitte in den beigegefügt Briefumschlag, verschließen ihn und versenden ihn (die Versandgebühr zahlt das Universitätsklinikum).

Wir freuen uns sehr, dass Sie an der Befragung teilnehmen. Bereits an dieser Stelle danken wir Ihnen ganz herzlich für Ihre Unterstützung.

Dr. phil. Isabelle Scholl  
(Projektleiterin)

Stefan Zeh, M.Sc.  
(Projektmitarbeiter)

Eva Christalle, M.Sc.  
(Projektmitarbeiterin)

Institutsdirektor: Prof. Dr. med. Dr. phil. Martin Härter  
Projektleitung: Dr. phil. Isabelle Scholl, Dipl. Psych.  
Martinistraße 52, 20246 Hamburg  
Tel.: 040/410 57135, Email: i.scholl@uke.de

Universitätsklinikum Hamburg-Eppendorf

## Überblick der Bestandteile von Patientenorientierung:

- I. Patientenorientierte Grundhaltung
  1. Patientenorientierte Merkmale der Behandler/innen
  2. Vertrauensvolles Miteinander
  3. Einzigartigkeit jeder Patientin/ jedes Patienten
  4. Berücksichtigung der Lebensumstände
- II. Rahmenbedingungen der Patientenorientierung
  5. Angemessene Kommunikation
  6. Einbezug ergänzender Angebote
  7. Zusammenarbeit von Behandlern
  8. Zugang zur Behandlung
  9. Gute Planung der Behandlung
  10. Patientensicherheit
- III. Konkrete Handlungen und Maßnahmen
  11. Persönlich angepasste Informationen
  12. Gleichberechtigte Zusammenarbeit und Beteiligung bei Entscheidungen
  13. Beteiligung von Familie und Freunden
  14. Aktivierung der Patientinnen und Patienten
  15. Unterstützung des körperlichen Wohlbefindens
  16. Unterstützung des psychischen Wohlbefindens

### **Vorbemerkung:**

*Behandler/innen meint alle Berufsgruppen, die sich um Patientinnen und Patienten kümmern. Dies sind zum Beispiel Ärztinnen und Ärzte, Pflegefachkräfte, Physiotherapeutinnen und Physiotherapeuten sowie Psychologinnen und Psychologen. Da wir eine möglichst kurze Beschreibung verwenden möchten, haben wir uns für einen Sammelbegriff entschieden. In Ihrer Behandlung sind vielleicht alle genannten Berufsgruppen beteiligt, möglicherweise sogar noch mehr. Wenn Sie daher „Behandlerin“ oder „Behandler“ lesen, bitte denken Sie dabei an alle behandelnden Berufsgruppen, die an Ihrer Behandlung beteiligt sind.*

## I. Patientenorientierte Grundhaltung

### 1. Patientenorientierte Merkmale der Behandler/innen

Die Behandler/innen sind:

- einfühlsam
- ehrlich
- wertschätzend

Die Behandler/innen sind sich des eigenen Verhaltens und der eigenen Gefühle bewusst. Die Behandler/innen verfügen über eine gute fachliche Kompetenz.

Bewertung der Wichtigkeit durch alle Teilnehmenden im Mittel: **X**  
Ihre persönliche Bewertung der Wichtigkeit: **X**

a) Wie wichtig finden Sie diesen Bestandteil?

|               |                          |                          |                          |                          |                          |                          |                          |                          |                          |                          |         |
|---------------|--------------------------|--------------------------|--------------------------|--------------------------|--------------------------|--------------------------|--------------------------|--------------------------|--------------------------|--------------------------|---------|
| Überhaupt     | <input type="checkbox"/> | Äußerst |
| nicht wichtig | 1                        | 2                        | 3                        | 4                        | 5                        | 6                        | 7                        | 8                        | 9                        |                          | wichtig |

Bewertung der Umsetzung durch alle Teilnehmenden im Mittel: **X**  
Ihre persönliche Bewertung der Umsetzung: **X**

b) Wie gut ist dieser Bestandteil Ihrer Erfahrung nach derzeit in Deutschland umgesetzt?

|                 |                          |                          |                          |                          |                          |                          |                          |                          |                          |             |
|-----------------|--------------------------|--------------------------|--------------------------|--------------------------|--------------------------|--------------------------|--------------------------|--------------------------|--------------------------|-------------|
| Überhaupt       | <input type="checkbox"/> | Vollständig |
| nicht umgesetzt | 1                        | 2                        | 3                        | 4                        | 5                        | 6                        | 7                        | 8                        | 9                        | umgesetzt   |

### 2. Vertrauensvolles Miteinander

Es besteht ein vertrauensvolles Miteinander zwischen Ihnen und der Behandlerin / dem Behandler. Wenn möglich gibt es gleichbleibende Ansprechpartner/innen. **Vor dem Gespräch informiert sich die Behandlerin / der Behandler über Ihren bisherigen Erkrankungsverlauf. Die Behandlerin / der Behandler spricht Sie auf bestehende Beschwerden und Ihr aktuelles Befinden an.**

a) Finden Sie, dass die Beschreibung mit den Veränderungen besser oder schlechter ist?

|            |                          |                          |                          |                          |                          |                          |                          |                          |                          |           |
|------------|--------------------------|--------------------------|--------------------------|--------------------------|--------------------------|--------------------------|--------------------------|--------------------------|--------------------------|-----------|
| Sehr viel  | <input type="checkbox"/> | Sehr viel |
| schlechter | 1                        | 2                        | 3                        | 4                        | 5                        | 6                        | 7                        | 8                        | 9                        | besser    |

Bewertung der Wichtigkeit durch alle Teilnehmenden im Mittel: **X**  
Ihre persönliche Bewertung der Wichtigkeit: **X**

b) Wie wichtig finden Sie diesen Bestandteil?

|               |                          |                          |                          |                          |                          |                          |                          |                          |                          |         |
|---------------|--------------------------|--------------------------|--------------------------|--------------------------|--------------------------|--------------------------|--------------------------|--------------------------|--------------------------|---------|
| Überhaupt     | <input type="checkbox"/> | Äußerst |
| nicht wichtig | 1                        | 2                        | 3                        | 4                        | 5                        | 6                        | 7                        | 8                        | 9                        | wichtig |

Bewertung der Umsetzung durch alle Teilnehmenden im Mittel: **X**  
Ihre persönliche Bewertung der Umsetzung: **X**

c) Wie gut ist dieser Bestandteil Ihrer Erfahrung nach derzeit in Deutschland umgesetzt?

|                 |                          |                          |                          |                          |                          |                          |                          |                          |                          |             |
|-----------------|--------------------------|--------------------------|--------------------------|--------------------------|--------------------------|--------------------------|--------------------------|--------------------------|--------------------------|-------------|
| Überhaupt       | <input type="checkbox"/> | Vollständig |
| nicht umgesetzt | 1                        | 2                        | 3                        | 4                        | 5                        | 6                        | 7                        | 8                        | 9                        | umgesetzt   |

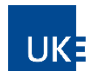

### 3. Einzigartigkeit jeder Patientin/ jedes Patienten

Die Behandler/innen gehen ein auf:

- Bedürfnisse
- Wünsche
- Sorgen
- Erwartungen

Sie erkennen an, dass Menschen verschieden sind.

Bewertung der Wichtigkeit durch alle Teilnehmenden im Mittel: **X**

Ihre persönliche Bewertung der Wichtigkeit: **X**

a) Wie wichtig finden Sie diesen Bestandteil?

|               |                          |                          |                          |                          |                          |                          |                          |                          |                          |         |
|---------------|--------------------------|--------------------------|--------------------------|--------------------------|--------------------------|--------------------------|--------------------------|--------------------------|--------------------------|---------|
| Überhaupt     | <input type="checkbox"/> | Äußerst |
| nicht wichtig | 1                        | 2                        | 3                        | 4                        | 5                        | 6                        | 7                        | 8                        | 9                        | wichtig |

Bewertung der Umsetzung durch alle Teilnehmenden im Mittel: **X**

Ihre persönliche Bewertung der Umsetzung: **X**

b) Wie gut ist dieser Bestandteil Ihrer Erfahrung nach derzeit in Deutschland umgesetzt?

|                 |                          |                          |                          |                          |                          |                          |                          |                          |                          |             |
|-----------------|--------------------------|--------------------------|--------------------------|--------------------------|--------------------------|--------------------------|--------------------------|--------------------------|--------------------------|-------------|
| Überhaupt       | <input type="checkbox"/> | Vollständig |
| nicht umgesetzt | 1                        | 2                        | 3                        | 4                        | 5                        | 6                        | 7                        | 8                        | 9                        | umgesetzt   |

### 4. Berücksichtigung der Lebensumstände

Die Behandler/innen sehen Sie als ganze Menschen. Es werden bei der Behandlung alle Lebensbereiche einbezogen.

Beispiele dafür sind:

- Körper
- Psyche/ Seele
- Familie und Freunde
- Beruf und Freizeit

a) Finden Sie, dass die Beschreibung mit den Veränderungen besser oder schlechter ist?

|            |                          |                          |                          |                          |                          |                          |                          |                          |                          |           |
|------------|--------------------------|--------------------------|--------------------------|--------------------------|--------------------------|--------------------------|--------------------------|--------------------------|--------------------------|-----------|
| Sehr viel  | <input type="checkbox"/> | Sehr viel |
| schlechter | 1                        | 2                        | 3                        | 4                        | 5                        | 6                        | 7                        | 8                        | 9                        | besser    |

Bewertung der Wichtigkeit durch alle Teilnehmenden im Mittel: **X**

Ihre persönliche Bewertung der Wichtigkeit: **X**

b) Wie wichtig finden Sie diesen Bestandteil?

|               |                          |                          |                          |                          |                          |                          |                          |                          |                          |         |
|---------------|--------------------------|--------------------------|--------------------------|--------------------------|--------------------------|--------------------------|--------------------------|--------------------------|--------------------------|---------|
| Überhaupt     | <input type="checkbox"/> | Äußerst |
| nicht wichtig | 1                        | 2                        | 3                        | 4                        | 5                        | 6                        | 7                        | 8                        | 9                        | wichtig |

Bewertung der Umsetzung durch alle Teilnehmenden im Mittel: **X**

Ihre persönliche Bewertung der Umsetzung: **X**

c) Wie gut ist dieser Bestandteil Ihrer Erfahrung nach derzeit in Deutschland umgesetzt?

|                 |                          |                          |                          |                          |                          |                          |                          |                          |                          |             |
|-----------------|--------------------------|--------------------------|--------------------------|--------------------------|--------------------------|--------------------------|--------------------------|--------------------------|--------------------------|-------------|
| Überhaupt       | <input type="checkbox"/> | Vollständig |
| nicht umgesetzt | 1                        | 2                        | 3                        | 4                        | 5                        | 6                        | 7                        | 8                        | 9                        | umgesetzt   |

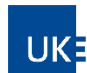

## II. Rahmenbedingungen der Patientorientierung

### 5. Angemessene Kommunikation

Die Behandler/innen kommunizieren angemessen und unterstützend mit Ihnen. Beispiele dafür sind:

- Leicht verständliche Sprache
- Fragen stellen
- Aufmerksam zuhören
- Blickkontakt halten

Bewertung der Wichtigkeit durch alle Teilnehmenden im Mittel: **X**

Ihre persönliche Bewertung der Wichtigkeit: **X**

a) Wie wichtig finden Sie diesen Bestandteil?

Überhaupt           Äußerst  
nicht wichtig 1 2 3 4 5 6 7 8 9 wichtig

Bewertung der Umsetzung durch alle Teilnehmenden im Mittel: **X**

Ihre persönliche Bewertung der Umsetzung: **X**

b) Wie gut ist dieser Bestandteil Ihrer Erfahrung nach derzeit in Deutschland umgesetzt?

Überhaupt           Vollständig  
nicht umgesetzt 1 2 3 4 5 6 7 8 9 umgesetzt

### 6. Einbezug ergänzender Angebote

Ergänzende Angebote werden anerkannt und in die Behandlung einbezogen, falls Sie sich das wünschen.

Beispiele dafür sind:

- Selbsthilfegruppen
- Alternativmedizin / Komplementärmedizin (z.B. Homöopathie, Osteopathie, Akupunktur und Naturheilkunde)
- Spirituelle Unterstützung / Seelsorge

Bewertung der Wichtigkeit durch alle Teilnehmenden im Mittel: **X**

Ihre persönliche Bewertung der Wichtigkeit: **X**

a) Wie wichtig finden Sie diesen Bestandteil?

Überhaupt           Äußerst  
nicht wichtig 1 2 3 4 5 6 7 8 9 wichtig

Bewertung der Umsetzung durch alle Teilnehmenden im Mittel: **X**

Ihre persönliche Bewertung der Umsetzung: **X**

b) Wie gut ist dieser Bestandteil Ihrer Erfahrung nach derzeit in Deutschland umgesetzt?

Überhaupt           Vollständig  
nicht umgesetzt 1 2 3 4 5 6 7 8 9 umgesetzt

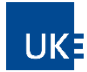

## 7. Zusammenarbeit von Behandlern

Innerhalb einer großen Praxis oder eines Krankenhauses hat die Zusammenarbeit einen hohen Stellenwert. Behandler/innen aus verschiedenen medizinischen Fachbereichen und Berufsgruppen arbeiten gut als Team zusammen. Die Zusammenarbeit ist geprägt von:

- Guten Absprachen
- Respekt
- Vertrauen
- Gemeinsamer Verantwortung

Die Leitungsebene fördert diese Teamarbeit.

Bewertung der Wichtigkeit durch alle Teilnehmenden im Mittel: **X**

Ihre persönliche Bewertung der Wichtigkeit: **X**

a) Wie wichtig finden Sie diesen Bestandteil?

|               |                          |                          |                          |                          |                          |                          |                          |                          |                          |         |
|---------------|--------------------------|--------------------------|--------------------------|--------------------------|--------------------------|--------------------------|--------------------------|--------------------------|--------------------------|---------|
| Überhaupt     | <input type="checkbox"/> | Äußerst |
| nicht wichtig | 1                        | 2                        | 3                        | 4                        | 5                        | 6                        | 7                        | 8                        | 9                        | wichtig |

Bewertung der Umsetzung durch alle Teilnehmenden im Mittel: **X**

Ihre persönliche Bewertung der Umsetzung: **X**

b) Wie gut ist dieser Bestandteil Ihrer Erfahrung nach derzeit in Deutschland umgesetzt?

|                 |                          |                          |                          |                          |                          |                          |                          |                          |                          |             |
|-----------------|--------------------------|--------------------------|--------------------------|--------------------------|--------------------------|--------------------------|--------------------------|--------------------------|--------------------------|-------------|
| Überhaupt       | <input type="checkbox"/> | Vollständig |
| nicht umgesetzt | 1                        | 2                        | 3                        | 4                        | 5                        | 6                        | 7                        | 8                        | 9                        | umgesetzt   |

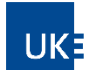

## 8. Zugang zur Behandlung

Sie erreichen Behandler/innen leicht und ohne Hindernisse.

Beispiele hierfür sind:

- Krankenhäuser und Arztpraxen in der Nähe des Wohnortes (auch auf dem Land)
- Guter Zugang zur Behandlung auch bei möglichen Hindernissen (z.B. Behinderung oder mangelnden Deutschkenntnissen)
- Möglichst geringe Zuzahlungen bei Kassenleistungen **unter Berücksichtigung Ihrer finanziellen Möglichkeiten**
- **Gute Terminvergabe: Sie erhalten Termine rechtzeitig (auch Facharzttermine) und flexibel (z.B. auch telefonisch oder per Mail). Es wird ausreichend Zeit für den Termin eingeplant**
- **Bei einem Notfall erhalten Sie eine Behandlung auch außerhalb der üblichen Praxiszeiten (z.B. Bereitschaftsdienst oder Hausbesuche).**
- **Sie erhalten leicht Informationen darüber, welche Behandler/innen welche Behandlungen und Spezialisierungen anbieten.**

a) Finden Sie, dass die Beschreibung mit den Veränderungen besser oder schlechter ist?

|                      |                          |                          |                          |                          |                          |                          |                          |                          |                          |                          |                  |
|----------------------|--------------------------|--------------------------|--------------------------|--------------------------|--------------------------|--------------------------|--------------------------|--------------------------|--------------------------|--------------------------|------------------|
| Sehr viel schlechter | <input type="checkbox"/> | Sehr viel besser |
|                      | 1                        | 2                        | 3                        | 4                        | 5                        | 6                        | 7                        | 8                        | 9                        |                          |                  |

Bewertung der Wichtigkeit durch alle Teilnehmenden im Mittel: **X**

Ihre persönliche Bewertung der Wichtigkeit: **X**

b) Wie wichtig finden Sie diesen Bestandteil?

|                         |                          |                          |                          |                          |                          |                          |                          |                          |                          |                 |
|-------------------------|--------------------------|--------------------------|--------------------------|--------------------------|--------------------------|--------------------------|--------------------------|--------------------------|--------------------------|-----------------|
| Überhaupt nicht wichtig | <input type="checkbox"/> | Äußerst wichtig |
|                         | 1                        | 2                        | 3                        | 4                        | 5                        | 6                        | 7                        | 8                        | 9                        |                 |

Bewertung der Umsetzung durch alle Teilnehmenden im Mittel: **X**

Ihre persönliche Bewertung der Umsetzung: **X**

c) Wie gut ist dieser Bestandteil Ihrer Erfahrung nach derzeit in Deutschland umgesetzt?

|                           |                          |                          |                          |                          |                          |                          |                          |                          |                          |                       |
|---------------------------|--------------------------|--------------------------|--------------------------|--------------------------|--------------------------|--------------------------|--------------------------|--------------------------|--------------------------|-----------------------|
| Überhaupt nicht umgesetzt | <input type="checkbox"/> | Vollständig umgesetzt |
|                           | 1                        | 2                        | 3                        | 4                        | 5                        | 6                        | 7                        | 8                        | 9                        |                       |



## 9. Gute Planung der Behandlung

Es wird eine aufeinander abgestimmte und fortlaufende Behandlung sichergestellt.

Das bedeutet:

- Aufeinanderfolgende Behandlungen werden abgesprochen und geplant
- Termine zur Kontrolle und Nachsorge werden vereinbart
- Gute Absprachen beim Wechsel zwischen Krankenhäusern und Arztpraxen

Sie erhalten auf Wunsch Unterstützung durch einen festen Ansprechpartner im Gesundheitswesen, der Ihnen dabei hilft, die Behandlungen und Termine zu organisieren.

a) Finden Sie, dass die Beschreibung mit den Veränderungen besser oder schlechter ist?

|                      |                          |                          |                          |                          |                          |                          |                          |                          |                          |                  |
|----------------------|--------------------------|--------------------------|--------------------------|--------------------------|--------------------------|--------------------------|--------------------------|--------------------------|--------------------------|------------------|
| Sehr viel schlechter | <input type="checkbox"/> | Sehr viel besser |
|                      | 1                        | 2                        | 3                        | 4                        | 5                        | 6                        | 7                        | 8                        | 9                        |                  |

|                                                                        |
|------------------------------------------------------------------------|
| Bewertung der Wichtigkeit durch alle Teilnehmenden im Mittel: <b>X</b> |
|------------------------------------------------------------------------|

|                                                      |
|------------------------------------------------------|
| Ihre persönliche Bewertung der Wichtigkeit: <b>X</b> |
|------------------------------------------------------|

b) Wie wichtig finden Sie diesen Bestandteil?

|                         |                          |                          |                          |                          |                          |                          |                          |                          |                          |                 |
|-------------------------|--------------------------|--------------------------|--------------------------|--------------------------|--------------------------|--------------------------|--------------------------|--------------------------|--------------------------|-----------------|
| Überhaupt nicht wichtig | <input type="checkbox"/> | Äußerst wichtig |
|                         | 1                        | 2                        | 3                        | 4                        | 5                        | 6                        | 7                        | 8                        | 9                        |                 |

|                                                                      |
|----------------------------------------------------------------------|
| Bewertung der Umsetzung durch alle Teilnehmenden im Mittel: <b>X</b> |
|----------------------------------------------------------------------|

|                                                    |
|----------------------------------------------------|
| Ihre persönliche Bewertung der Umsetzung: <b>X</b> |
|----------------------------------------------------|

c) Wie gut ist dieser Bestandteil Ihrer Erfahrung nach derzeit in Deutschland umgesetzt?

|                           |                          |                          |                          |                          |                          |                          |                          |                          |                          |                       |
|---------------------------|--------------------------|--------------------------|--------------------------|--------------------------|--------------------------|--------------------------|--------------------------|--------------------------|--------------------------|-----------------------|
| Überhaupt nicht umgesetzt | <input type="checkbox"/> | Vollständig umgesetzt |
|                           | 1                        | 2                        | 3                        | 4                        | 5                        | 6                        | 7                        | 8                        | 9                        |                       |



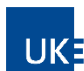

## 10. Patientensicherheit

Die Behandlung wird so gestaltet, dass Ihr Risiko für negative Folgen und Fehler in der Behandlung möglichst gering ist.

Beispiele hierfür sind:

- Sauberkeit der Einrichtungen und der medizinischen Instrumente
- Aktuelle wissenschaftliche Ergebnisse werden bei der Behandlung berücksichtigt
- Wechselwirkungen zwischen verschiedenen Medikamenten werden beachtet
- Gründliche Aufzeichnung des Behandlungsverlaufs

a) Finden Sie, dass die Beschreibung mit den Veränderungen besser oder schlechter ist?

|                      |                          |                          |                          |                          |                          |                          |                          |                          |                          |                  |
|----------------------|--------------------------|--------------------------|--------------------------|--------------------------|--------------------------|--------------------------|--------------------------|--------------------------|--------------------------|------------------|
| Sehr viel schlechter | <input type="checkbox"/> | Sehr viel besser |
|                      | 1                        | 2                        | 3                        | 4                        | 5                        | 6                        | 7                        | 8                        | 9                        |                  |

Bewertung der Wichtigkeit durch alle Teilnehmenden im Mittel: **X**

Ihre persönliche Bewertung der Wichtigkeit: **X**

b) Wie wichtig finden Sie diesen Bestandteil?

|                         |                          |                          |                          |                          |                          |                          |                          |                          |                          |                 |
|-------------------------|--------------------------|--------------------------|--------------------------|--------------------------|--------------------------|--------------------------|--------------------------|--------------------------|--------------------------|-----------------|
| Überhaupt nicht wichtig | <input type="checkbox"/> | Äußerst wichtig |
|                         | 1                        | 2                        | 3                        | 4                        | 5                        | 6                        | 7                        | 8                        | 9                        |                 |

Bewertung der Umsetzung durch alle Teilnehmenden im Mittel: **X**

Ihre persönliche Bewertung der Umsetzung: **X**

c) Wie gut ist dieser Bestandteil Ihrer Erfahrung nach derzeit in Deutschland umgesetzt?

|                           |                          |                          |                          |                          |                          |                          |                          |                          |                          |                       |
|---------------------------|--------------------------|--------------------------|--------------------------|--------------------------|--------------------------|--------------------------|--------------------------|--------------------------|--------------------------|-----------------------|
| Überhaupt nicht umgesetzt | <input type="checkbox"/> | Vollständig umgesetzt |
|                           | 1                        | 2                        | 3                        | 4                        | 5                        | 6                        | 7                        | 8                        | 9                        |                       |

### III. Konkrete Handlungen und Maßnahmen

#### 11. Persönlich angepasste Informationen

Die Behandler/innen geben Ihnen Informationen über Ihre Vorsorge, Erkrankung und die Behandlungsmöglichkeiten **und deren mögliche Kosten in Form von Zuzahlungen**. Diese Informationen sind angepasst an Ihre persönlichen Wünsche und Bedürfnisse. Sie werden ermutigt, Ihr eigenes Wissen mit den Behandler/innen zu teilen. **Wenn Sie Medikamente verschrieben bekommen, erhalten Sie eine schriftliche Übersicht über die Einnahme und die möglichen Nebenwirkungen (Medikamentenplan).**

a) Finden Sie, dass die Beschreibung mit den Veränderungen besser oder schlechter ist?

Sehr viel schlechter  1  2  3  4  5  6  7  8  9 Sehr viel besser

Bewertung der Wichtigkeit durch alle Teilnehmenden im Mittel: **X**

Ihre persönliche Bewertung der Wichtigkeit: **X**

b) Wie wichtig finden Sie diesen Bestandteil?

Überhaupt nicht wichtig  1  2  3  4  5  6  7  8  9 Äußerst wichtig

Bewertung der Umsetzung durch alle Teilnehmenden im Mittel: **X**

Ihre persönliche Bewertung der Umsetzung: **X**

c) Wie gut ist dieser Bestandteil Ihrer Erfahrung nach derzeit in Deutschland umgesetzt?

Überhaupt nicht umgesetzt  1  2  3  4  5  6  7  8  9 Vollständig umgesetzt

#### 12. Gleichberechtigte Zusammenarbeit und Beteiligung bei Entscheidungen

Es wird eine gleichberechtigte Zusammenarbeit zwischen Ihnen und den Behandler/innen angestrebt. Entscheidungen zur Behandlung werden gemeinsam getroffen, falls Sie sich das wünschen. Dabei bringen Sie aktiv Ihre eigene Sicht, Wünsche und Ziele mit ein.

Bewertung der Wichtigkeit durch alle Teilnehmenden im Mittel: **X**

Ihre persönliche Bewertung der Wichtigkeit: **X**

a) Wie wichtig finden Sie diesen Bestandteil?

Überhaupt nicht wichtig  1  2  3  4  5  6  7  8  9 Äußerst wichtig

Bewertung der Umsetzung durch alle Teilnehmenden im Mittel: **X**

Ihre persönliche Bewertung der Umsetzung: **X**

b) Wie gut ist dieser Bestandteil Ihrer Erfahrung nach derzeit in Deutschland umgesetzt?

Überhaupt nicht umgesetzt  1  2  3  4  5  6  7  8  9 Vollständig umgesetzt



### 13. Beteiligung von Familie und Freunden

Ihre Familienmitglieder und Freunde werden in dem Maß in die Behandlung einbezogen, wie Sie es sich wünschen.

Beispiele dafür sind:

- Familie und Freunde bekommen Informationen
- Familie und Freunde nehmen an Gesprächen teil
- Familie und Freunde unterstützen aktiv die Behandlung im Alltag (z.B. beim Einnehmen von Medikamenten oder Hinbringen zur Behandlung)

Bewertung der Wichtigkeit durch alle Teilnehmenden im Mittel: **X**

Ihre persönliche Bewertung der Wichtigkeit: **X**

a) Wie wichtig finden Sie diesen Bestandteil?

Überhaupt           Äußerst  
nicht wichtig 1 2 3 4 5 6 7 8 9 wichtig

Bewertung der Umsetzung durch alle Teilnehmenden im Mittel: **X**

Ihre persönliche Bewertung der Umsetzung: **X**

b) Wie gut ist dieser Bestandteil Ihrer Erfahrung nach derzeit in Deutschland umgesetzt?

Überhaupt          Vollständig  
nicht umgesetzt 1 2 3 4 5 6 7 8 9 umgesetzt

### 14. Aktivierung der Patientinnen und Patienten

Die Behandler/innen bestärken Sie darin, aktiv und selbstständig mit Ihrer Erkrankung und der Behandlung umzugehen. Dadurch werden Sie zu Experten Ihrer eigenen Erkrankung.

Beispiele dafür sind:

- Im Alltag gut mit den Anforderungen der Erkrankung umgehen
- Aktiv am Gespräch mit Behandler/innen teilnehmen
- Zurechtfinden im Gesundheitswesen
- **Möglichkeiten zur Verbesserung der eigenen Situation suchen (z.B. mehr Sport treiben oder ein neues Hobby für sich finden)**

a) Finden Sie, dass die Beschreibung mit den Veränderungen besser oder schlechter ist?

Sehr viel           Sehr viel  
schlechter 1 2 3 4 5 6 7 8 9 besser

Bewertung der Wichtigkeit durch alle Teilnehmenden im Mittel: **X**

Ihre persönliche Bewertung der Wichtigkeit: **X**

b) Wie wichtig finden Sie diesen Bestandteil?

Überhaupt           Äußerst  
nicht wichtig 1 2 3 4 5 6 7 8 9 wichtig

Bewertung der Umsetzung durch alle Teilnehmenden im Mittel: **X**

Ihre persönliche Bewertung der Umsetzung: **X**

c) Wie gut ist dieser Bestandteil Ihrer Erfahrung nach derzeit in Deutschland umgesetzt?

Überhaupt          Vollständig  
nicht umgesetzt 1 2 3 4 5 6 7 8 9 umgesetzt



### 15. Unterstützung des körperlichen Wohlbefindens

Die Behandler/innen kümmern sich um Ihr körperliches Wohlbefinden.

Beispiele dafür sind:

- Behandlung von Schmerzen
- Gesunde Ernährung
- Unterstützung im Alltag (z.B. durch die Verordnung von Gehhilfen **und durch Übungen, diese im Alltag richtig zu benutzen**)

a) Finden Sie, dass die Beschreibung mit den Veränderungen besser oder schlechter ist?

Sehr viel schlechter  1  2  3  4  5  6  7  8  9 Sehr viel besser

Bewertung der Wichtigkeit durch alle Teilnehmenden im Mittel: **X**

Ihre persönliche Bewertung der Wichtigkeit: **X**

b) Wie wichtig finden Sie diesen Bestandteil?

Überhaupt nicht wichtig  1  2  3  4  5  6  7  8  9 Äußerst wichtig

Bewertung der Umsetzung durch alle Teilnehmenden im Mittel: **X**

Ihre persönliche Bewertung der Umsetzung: **X**

c) Wie gut ist dieser Bestandteil Ihrer Erfahrung nach derzeit in Deutschland umgesetzt?

Überhaupt nicht umgesetzt  1  2  3  4  5  6  7  8  9 Vollständig umgesetzt

### 16. Unterstützung des psychischen Wohlbefindens

Die Behandler/innen gehen auf Ihre Gefühlslage und Ihr psychisches Befinden ein.

Beispiele dafür sind:

- Ansprechen von Sorgen und Ängsten
- Angebot psychologischer Unterstützung

Bewertung der Wichtigkeit durch alle Teilnehmenden im Mittel: **X**

Ihre persönliche Bewertung der Wichtigkeit: **X**

a) Wie wichtig finden Sie diesen Bestandteil?

Überhaupt nicht wichtig  1  2  3  4  5  6  7  8  9 Äußerst wichtig

Bewertung der Umsetzung durch alle Teilnehmenden im Mittel: **X**

Ihre persönliche Bewertung der Umsetzung: **X**

b) Wie gut ist dieser Bestandteil Ihrer Erfahrung nach derzeit in Deutschland umgesetzt?

Überhaupt nicht umgesetzt  1  2  3  4  5  6  7  8  9 Vollständig umgesetzt

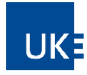

Universitätsklinikum Hamburg-Eppendorf

Teilnehmercode: X

Seite 13/13

Sie haben nun unsere Beschreibung zur Patientenorientierung gelesen und bewertet.

Wenn Sie finden, dass Bestandteile in unserer Beschreibung immer noch fehlen, können Sie diese hier benennen:

---

---

---

---

---

---

---

---

Haben Sie noch weitere Anmerkungen zu der Beschreibung (z.B. Verständlichkeit)?

---

---

---

---

---

---

---

---

Vielen Dank für das Ausfüllen des Fragebogens. Sie haben uns damit sehr geholfen und einen Beitrag für die Verbesserung der Versorgung geleistet!
