# Supplementary material for: Assessing the relevance and implementation of patient-centredness from the patients’ perspective in Germany: results of a Delphi study
Source: PubMed Central journal article supplement — BMJ Open. 2019 Dec 23;9(12):e031741. doi: 10.1136/bmjopen-2019-031741 (PMC7008421; doi:10.1136/bmjopen-2019-031741), 2019-12-23
Supplement: bmjopen-2019-031741supp002.pdf [file bmjopen-2019-031741supp002.pdf]

**S1: Overview of diseases indicated by patients (online supplement)**

| <b><i>Name of disease</i></b>                     | <b><i>Frequency</i></b> |
|---------------------------------------------------|-------------------------|
| Addiction disorder                                | 2                       |
| Allergies                                         | 1                       |
| Ametropia                                         | 1                       |
| Anemia                                            | 1                       |
| Asthma                                            | 3                       |
| Back pain                                         | 1                       |
| Cataract                                          | 1                       |
| Cholesterol disorder                              | 4                       |
| Chronic inflammatory demyelinating polyneuropathy | 3                       |
| Chronic obstipation                               | 1                       |
| Chronic obstructive pulmonary disease (COPD)      | 1                       |
| Chronic pain                                      | 1                       |
| Diabetes                                          | 12                      |
| Disorder of cardiac valves                        | 1                       |
| Disorder of carotids                              | 1                       |
| Disorder of cervical spine                        | 1                       |
| Disorder of conjunctive tissue                    | 1                       |
| Disorder of feet                                  | 1                       |
| Disorder of lungs                                 | 1                       |
| Disorder of stomach                               | 1                       |
| Endometriosis                                     | 2                       |
| Essential tremor                                  | 1                       |
| Eyelids disorder                                  | 1                       |
| Eyes damaged by hypertension                      | 1                       |
| Focal dystopia                                    | 1                       |
| Food allergy                                      | 1                       |
| Gastroesophageal reflux disease                   | 1                       |
| Glaucoma                                          | 1                       |
| Hardness of hearing                               | 2                       |
| Hashimoto's thyroiditis                           | 2                       |
| Heart attack                                      | 1                       |

|                                      |   |
|--------------------------------------|---|
| Heartburn                            | 1 |
| HIV infection                        | 1 |
| Hypercalciuria                       | 1 |
| Hyperuricemia                        | 1 |
| Hypothyroidism                       | 4 |
| Incontinence                         | 1 |
| Inflammation of pancreas             | 1 |
| Intestinal surgery (removal of 10cm) | 1 |
| Irritable bowel syndrome             | 1 |
| Kidney insufficiency                 | 1 |
| Migraine                             | 2 |
| Multiple sclerosis                   | 1 |
| Neural pain                          | 1 |
| Neurodermatitis                      | 1 |
| Obesity                              | 2 |
| Polycystic ovary syndrome            | 1 |
| Potassium deficiency                 | 1 |
| Schwannoma                           | 1 |
| Scleroderma                          | 1 |
| Sjögren syndrome                     | 1 |
| Skin disorder                        | 1 |
| Sleep apnea                          | 5 |
| Sleep disorder                       | 2 |
| Snoring                              | 1 |
| Somatization disorder                | 1 |
| Somnambulism                         | 1 |
| Struma multinodosa                   | 1 |
| Strumectomy                          | 1 |
| Swaying/Pendulation                  | 1 |
| Takotsubo cardiomyopathy             | 1 |
| Thrombosis                           | 2 |
| Thyroiditis                          | 1 |
| Trichotillomania                     | 1 |
| Vitamin D deficiency                 | 1 |
